# Supplementary material
Source: publisher figshare collection journal article supplement (https://geolsoc.figshare.com/articles/dataset/_/3453224)
Supplement: Supplementary file 1 [file 1]

## Supplementary Data

## Seismic Reflection Data





## Supplementary Data

### U-Pb LA-ICP-MS Data

| Sample_<br>Grain # | Pb207/<br>Pb206 | ± 1σ    | Pb208/<br>Th232 | ± 1σ    | Pb207/<br>U235 | ± 1σ    | Pb206/<br>U238 | ± 1σ    | rho      | Conc.<br>(%) | Pb207/P<br>b206 | ± 1σ   | Pb206/U<br>238 | ± 1σ  | Pb207/<br>U235 | ± 1σ  | Pb208/T<br>h232 | ± 1σ   | Age    |
|--------------------|-----------------|---------|-----------------|---------|----------------|---------|----------------|---------|----------|--------------|-----------------|--------|----------------|-------|----------------|-------|-----------------|--------|--------|
| 74317_01           | 0.05193         | 0.00249 | 0.01404         | 0.00091 | 0.28885        | 0.01354 | 0.04034        | 0.00082 | 0.433642 | 101          | 282.5           | 106.18 | 255            | 5.06  | 257.7          | 10.67 | 281.9           | 18.1   | 255    |
| 74317_02           | 0.05533         | 0.00193 | 0.02123         | 0.00121 | 0.48116        | 0.01669 | 0.06307        | 0.00112 | 0.511951 | 101          | 425.5           | 75.66  | 394.3          | 6.78  | 398.9          | 11.44 | 424.6           | 24     | 394.3  |
| 74317_03           | 0.04979         | 0.01354 | 0.00597         | 0.00109 | 0.1462         | 0.03855 | 0.0213         | 0.00148 | 0.263515 | 102          | 185.2           | 534    | 135.9          | 9.34  | 138.6          | 34.15 | 120.3           | 21.91  | 135.9  |
| 74317_04           | 0.05264         | 0.00286 | 0.01633         | 0.00113 | 0.36102        | 0.0191  | 0.04974        | 0.00106 | 0.402808 | 100          | 313.4           | 118.74 | 312.9          | 6.54  | 313            | 14.25 | 327.3           | 22.49  | 312.9  |
| 74317_05           | 0.06231         | 0.00311 | 0.0331          | 0.00227 | 0.94483        | 0.0457  | 0.10999        | 0.00241 | 0.453003 | 100          | 684.7           | 102.98 | 672.7          | 13.97 | 675.4          | 23.86 | 658.1           | 44.44  | 672.7  |
| 74317_06           | 0.05591         | 0.00217 | 0.01115         | 0.00067 | 0.25372        | 0.00969 | 0.03292        | 0.00061 | 0.485178 | 110          | 448.5           | 83.73  | 208.8          | 3.82  | 229.6          | 7.85  | 224.2           | 13.38  | 208.8  |
| 74317_07           | 0.07808         | 0.00196 | 0.06642         | 0.00419 | 2.02596        | 0.05231 | 0.18821        | 0.00311 | 0.639976 | 97           | 1148.9          | 49.06  | 1111.7         | 16.89 | 1124.3         | 17.55 | 1299.9          | 79.34  | 1148.9 |
| 74317_08           | 0.0569          | 0.00222 | 0.03159         | 0.00239 | 0.64844        | 0.02497 | 0.08267        | 0.00156 | 0.490036 | 99           | 486.9           | 84.57  | 512            | 9.27  | 507.5          | 15.38 | 628.6           | 46.81  | 512    |
| 74317_09           | 0.05608         | 0.0024  | 0.02928         | 0.00224 | 0.66111        | 0.02777 | 0.08551        | 0.00168 | 0.467725 | 97           | 455.1           | 92.65  | 528.9          | 9.99  | 515.3          | 16.98 | 583.4           | 43.99  | 528.9  |
| 74317_10           | 0.05519         | 0.00206 | 0.01432         | 0.00108 | 0.29942        | 0.01108 | 0.03935        | 0.00072 | 0.494457 | 107          | 419.8           | 81.04  | 248.8          | 4.47  | 265.9          | 8.66  | 287.3           | 21.53  | 248.8  |
| 74317_11           | 0.0577          | 0.00492 | 0.0076          | 0.00165 | 0.35548        | 0.0291  | 0.04469        | 0.00136 | 0.37175  | 110          | 518             | 177.37 | 281.8          | 8.39  | 308.8          | 21.8  | 153.1           | 33.09  | 281.8  |
| 74317_12           | 0.05664         | 0.00322 | 0.01562         | 0.00138 | 0.35858        | 0.01971 | 0.04592        | 0.00105 | 0.415994 | 108          | 477             | 121.54 | 289.4          | 6.49  | 311.2          | 14.73 | 313.2           | 27.43  | 289.4  |
| 74317_13           | 0.05968         | 0.00152 | 0.02553         | 0.00225 | 0.70808        | 0.01869 | 0.08607        | 0.0014  | 0.616239 | 102          | 591.8           | 54.41  | 532.2          | 8.3   | 543.6          | 11.11 | 509.6           | 44.25  | 532.2  |
| 74317_14           | 0.05939         | 0.00252 | 0.02762         | 0.00259 | 0.65953        | 0.02747 | 0.08055        | 0.0016  | 0.476903 | 103          | 581.4           | 89.67  | 499.4          | 9.53  | 514.3          | 16.81 | 550.6           | 50.92  | 499.4  |
| 74317_15           | 0.05227         | 0.00172 | 0.0215          | 0.00201 | 0.42134        | 0.01394 | 0.05847        | 0.00102 | 0.527275 | 97           | 297.2           | 73.36  | 366.3          | 6.23  | 357            | 9.96  | 430             | 39.81  | 366.3  |
| 74317_16           | 0.05164         | 0.00519 | 0.00975         | 0.00079 | 0.17741        | 0.01724 | 0.02492        | 0.00079 | 0.326227 | 104          | 269.3           | 214.92 | 158.7          | 4.94  | 165.8          | 14.86 | 196.1           | 15.86  | 158.7  |
| 74317_17           | 0.09865         | 0.00347 | 0.09558         | 0.00664 | 3.30906        | 0.11402 | 0.24327        | 0.00486 | 0.579791 | 88           | 1598.7          | 64.3   | 1403.7         | 25.22 | 1483.2         | 26.87 | 1845.1          | 122.54 | 1598.7 |
| 74317_18           | 0.05913         | 0.00154 | 0.03416         | 0.00223 | 0.76444        | 0.02042 | 0.09375        | 0.00151 | 0.602967 | 100          | 571.9           | 55.51  | 577.7          | 8.87  | 576.6          | 11.75 | 679             | 43.5   | 577.7  |
| 74317_19           | 0.05146         | 0.00604 | 0.0156          | 0.00192 | 0.35063        | 0.03951 | 0.04942        | 0.00187 | 0.3358   | 98           | 261.3           | 248.75 | 310.9          | 11.49 | 305.2          | 29.7  | 312.8           | 38.3   | 310.9  |
| 74317_20           | 0.05111         | 0.00328 | 0.01302         | 0.00111 | 0.25663        | 0.01597 | 0.03641        | 0.00085 | 0.375146 | 101          | 246             | 141.19 | 230.5          | 5.28  | 231.9          | 12.9  | 261.5           | 22.1   | 230.5  |
| 74317_21           | 0.04983         | 0.00217 | 0.01332         | 0.00107 | 0.27253        | 0.01165 | 0.03966        | 0.00075 | 0.442381 | 98           | 187.1           | 98.22  | 250.7          | 4.67  | 244.7          | 9.3   | 267.4           | 21.36  | 250.7  |
| 74317_22           | 0.0527          | 0.00303 | 0.00762         | 0.00063 | 0.17229        | 0.0096  | 0.02371        | 0.00053 | 0.401174 | 107          | 315.9           | 125.32 | 151            | 3.32  | 161.4          | 8.31  | 153.4           | 12.59  | 151    |
| 74317_23           | 0.05124         | 0.0035  | 0.01013         | 0.00095 | 0.23574        | 0.01558 | 0.03336        | 0.00082 | 0.371924 | 102          | 251.7           | 150.12 | 211.6          | 5.15  | 214.9          | 12.8  | 203.6           | 19.08  | 211.6  |
| 74317_24           | 0.05333         | 0.00829 | 0.00472         | 0.0007  | 0.11902        | 0.01782 | 0.01619        | 0.00074 | 0.305279 | 110          | 342.6           | 318.1  | 103.5          | 4.67  | 114.2          | 16.17 | 95.2            | 14.03  | 103.5  |
| 74317_25           | 0.05152         | 0.00258 | 0.01557         | 0.00141 | 0.32251        | 0.01574 | 0.0454         | 0.00093 | 0.419726 | 99           | 263.9           | 110.81 | 286.2          | 5.73  | 283.8          | 12.08 | 312.3           | 28.06  | 286.2  |
| 74317_26           | 0.11543         | 0.00326 | 0.08649         | 0.00786 | 4.24276        | 0.12075 | 0.26655        | 0.00454 | 0.598465 | 81           | 1886.6          | 50.03  | 1523.3         | 23.09 | 1682.3         | 23.39 | 1676.7          | 146.28 | 1886.6 |
| 74317_27           | 0.05941         | 0.00188 | 0.02574         | 0.00251 | 0.67866        | 0.02151 | 0.08285        | 0.0014  | 0.533147 | 103          | 582             | 67.31  | 513.1          | 8.35  | 526            | 13.01 | 513.6           | 49.55  | 513.1  |
| 74317_28           | 0.05265         | 0.00246 | 0.00983         | 0.00098 | 0.21893        | 0.00998 | 0.03015        | 0.0006  | 0.436555 | 105          | 313.9           | 102.84 | 191.5          | 3.73  | 201            | 8.32  | 197.7           | 19.52  | 191.5  |
| 74317_29           | 0.20753         | 0.00713 | 0.07964         | 0.00886 | 7.18946        | 0.23847 | 0.25127        | 0.00506 | 0.607117 | 50           | 2886.3          | 54.7   | 1445           | 26.08 | 2135.2         | 29.57 | 1548.9          | 165.89 | 2886.3 |
| 74317_30           | 0.06072         | 0.00306 | 0.03057         | 0.00327 | 0.82838        | 0.04043 | 0.09895        | 0.00211 | 0.436911 | 101          | 629.3           | 104.94 | 608.3          | 12.4  | 612.7          | 22.45 | 608.7           | 64.19  | 608.3  |
| 74317_31           | 0.04807         | 0.00561 | 0.00713         | 0.00065 | 0.13268        | 0.0149  | 0.02001        | 0.00074 | 0.329309 | 99           | 102.9           | 254.89 | 127.7          | 4.65  | 126.5          | 13.36 | 143.5           | 13     | 127.7  |

|          |         |         |         |         |         |         |         |         |          |     |        |        |        |       |        |       |        |        |               |
|----------|---------|---------|---------|---------|---------|---------|---------|---------|----------|-----|--------|--------|--------|-------|--------|-------|--------|--------|---------------|
| 74317_32 | 0.05525 | 0.00575 | 0.00922 | 0.00094 | 0.1964  | 0.01952 | 0.02577 | 0.00093 | 0.363103 | 111 | 422.3  | 217.06 | 164    | 5.82  | 182.1  | 16.57 | 185.4  | 18.75  | <b>164</b>    |
| 74317_33 | 0.05865 | 0.00151 | 0.0246  | 0.00191 | 0.66311 | 0.01762 | 0.08198 | 0.00134 | 0.615144 | 102 | 554.3  | 55.09  | 507.9  | 7.98  | 516.5  | 10.76 | 491.1  | 37.77  | <b>507.9</b>  |
| 74317_34 | 0.05081 | 0.00293 | 0.01329 | 0.00099 | 0.28257 | 0.01583 | 0.04032 | 0.00092 | 0.407298 | 99  | 232.2  | 127.85 | 254.8  | 5.68  | 252.7  | 12.53 | 266.9  | 19.67  | <b>254.8</b>  |
| 74317_35 | 0.06006 | 0.00244 | 0.02799 | 0.00233 | 0.80105 | 0.03205 | 0.0967  | 0.0019  | 0.491087 | 100 | 605.9  | 85.55  | 595    | 11.16 | 597.4  | 18.07 | 557.9  | 45.78  | <b>595</b>    |
| 74317_36 | 0.05345 | 0.00316 | 0.01225 | 0.00097 | 0.26567 | 0.01522 | 0.03604 | 0.00084 | 0.406839 | 105 | 347.8  | 127.67 | 228.2  | 5.23  | 239.2  | 12.21 | 246.1  | 19.39  | <b>228.2</b>  |
| 74317_37 | 0.08162 | 0.00691 | 0.05823 | 0.00603 | 2.41578 | 0.19405 | 0.21461 | 0.00783 | 0.454209 | 101 | 1236.3 | 157.69 | 1253.4 | 41.55 | 1247.3 | 57.68 | 1143.9 | 115.15 | <b>1236.3</b> |
| 74317_38 | 0.05141 | 0.00257 | 0.01434 | 0.00126 | 0.34627 | 0.01697 | 0.04884 | 0.00104 | 0.434501 | 98  | 259.1  | 111    | 307.4  | 6.38  | 301.9  | 12.8  | 287.9  | 25.02  | <b>307.4</b>  |
| 74317_39 | 0.05682 | 0.00244 | 0.02909 | 0.00258 | 0.72235 | 0.03059 | 0.09218 | 0.00186 | 0.47648  | 97  | 484    | 92.8   | 568.4  | 10.98 | 552.1  | 18.03 | 579.6  | 50.75  | <b>568.4</b>  |
| 74317_40 | 0.05514 | 0.00379 | 0.0302  | 0.00292 | 0.73113 | 0.04867 | 0.09615 | 0.00254 | 0.396842 | 94  | 417.7  | 146.87 | 591.8  | 14.94 | 557.2  | 28.55 | 601.4  | 57.37  | <b>591.8</b>  |
| 74317_41 | 0.05814 | 0.00226 | 0.01293 | 0.0045  | 0.71862 | 0.02776 | 0.08963 | 0.00175 | 0.505434 | 99  | 534.5  | 83.3   | 553.3  | 10.33 | 549.9  | 16.4  | 259.6  | 89.72  | <b>553.3</b>  |
| 74317_42 | 0.06329 | 0.00316 | 0.03338 | 0.00361 | 0.98034 | 0.04775 | 0.11232 | 0.00254 | 0.46428  | 101 | 718    | 102.52 | 686.2  | 14.71 | 693.8  | 24.48 | 663.7  | 70.56  | <b>686.2</b>  |
| 74317_43 | 0.0458  | 0.00287 | 0.01615 | 0.00172 | 0.31712 | 0.01942 | 0.05021 | 0.0012  | 0.39027  | 89  | 0.1    | 132.09 | 315.8  | 7.37  | 279.7  | 14.97 | 323.9  | 34.21  | <b>315.8</b>  |
| 74317_44 | 0.05417 | 0.00312 | 0.00858 | 0.00174 | 0.28747 | 0.01613 | 0.03848 | 0.00091 | 0.421468 | 105 | 378.1  | 124.12 | 243.4  | 5.63  | 256.6  | 12.72 | 172.7  | 34.96  | <b>243.4</b>  |
| 74317_45 | 0.05042 | 0.00228 | 0.01429 | 0.00159 | 0.3618  | 0.01627 | 0.05204 | 0.00108 | 0.461496 | 96  | 214.5  | 101.59 | 327    | 6.61  | 313.6  | 12.13 | 286.8  | 31.61  | <b>327</b>    |
| 74317_46 | 0.04985 | 0.00202 | 0.00796 | 0.00058 | 0.1719  | 0.0069  | 0.02503 | 0.00046 | 0.457851 | 101 | 187.9  | 91.84  | 159.3  | 2.88  | 161.1  | 5.98  | 160.3  | 11.59  | <b>159.3</b>  |
| 74317_47 | 0.04911 | 0.00583 | 0.00646 | 0.00059 | 0.14695 | 0.01675 | 0.02171 | 0.00083 | 0.335408 | 101 | 153.2  | 256.72 | 138.5  | 5.22  | 139.2  | 14.82 | 130.2  | 11.86  | <b>138.5</b>  |
| 74317_48 | 0.05203 | 0.00281 | 0.01351 | 0.0011  | 0.30268 | 0.01592 | 0.04222 | 0.00091 | 0.409792 | 101 | 286.5  | 119    | 266.6  | 5.61  | 268.5  | 12.41 | 271.2  | 21.88  | <b>266.6</b>  |
| 74317_49 | 0.04849 | 0.00853 | 0.00878 | 0.00161 | 0.22652 | 0.03836 | 0.0339  | 0.00174 | 0.303094 | 96  | 123.3  | 368.28 | 214.9  | 10.87 | 207.3  | 31.76 | 176.8  | 32.26  | <b>214.9</b>  |
| 74317_50 | 0.05687 | 0.00177 | 0.02849 | 0.0034  | 0.69281 | 0.02178 | 0.08842 | 0.00146 | 0.525241 | 98  | 485.9  | 67.85  | 546.2  | 8.66  | 534.5  | 13.07 | 567.8  | 66.73  | <b>546.2</b>  |
| 74317_51 | 0.05073 | 0.00171 | 0.01511 | 0.00142 | 0.33589 | 0.01135 | 0.04806 | 0.00081 | 0.498772 | 97  | 228.5  | 76.04  | 302.6  | 4.96  | 294    | 8.63  | 303    | 28.21  | <b>302.6</b>  |
| 74317_52 | 0.05862 | 0.00326 | 0.0277  | 0.00334 | 0.65789 | 0.03544 | 0.08146 | 0.00184 | 0.419308 | 102 | 553    | 117.12 | 504.8  | 11    | 513.3  | 21.71 | 552.2  | 65.76  | <b>504.8</b>  |
| 74317_53 | 0.13717 | 0.00426 | 0.11228 | 0.01211 | 7.37948 | 0.22872 | 0.39047 | 0.00681 | 0.562705 | 97  | 2191.7 | 52.97  | 2125   | 31.58 | 2158.5 | 27.72 | 2150.9 | 219.99 | <b>2191.7</b> |
| 74317_54 | 0.09625 | 0.003   | 0.07412 | 0.00855 | 3.15717 | 0.0983  | 0.23807 | 0.00396 | 0.534238 | 89  | 1552.6 | 57.49  | 1376.6 | 20.62 | 1446.8 | 24.01 | 1445.2 | 160.94 | <b>1552.6</b> |
| 74317_55 | 0.05603 | 0.00302 | 0.01189 | 0.00147 | 0.27519 | 0.01431 | 0.03564 | 0.00077 | 0.415476 | 109 | 453.3  | 115.77 | 225.8  | 4.79  | 246.8  | 11.4  | 238.8  | 29.35  | <b>225.8</b>  |
| 74317_56 | 0.05981 | 0.00211 | 0.02995 | 0.00383 | 0.75549 | 0.02617 | 0.09166 | 0.00156 | 0.491326 | 101 | 596.8  | 74.81  | 565.3  | 9.23  | 571.4  | 15.14 | 596.5  | 75.11  | <b>565.3</b>  |
| 74317_57 | 0.04973 | 0.00327 | 0.01304 | 0.00184 | 0.26525 | 0.01674 | 0.0387  | 0.00092 | 0.376684 | 98  | 182.5  | 146.21 | 244.8  | 5.72  | 238.9  | 13.44 | 262    | 36.65  | <b>244.8</b>  |
| 74317_58 | 0.04916 | 0.0033  | 0.01342 | 0.00198 | 0.25481 | 0.0164  | 0.0376  | 0.00092 | 0.380165 | 97  | 155.6  | 150.22 | 237.9  | 5.69  | 230.5  | 13.27 | 269.5  | 39.45  | <b>237.9</b>  |
| 74317_59 | 0.04922 | 0.0033  | 0.01299 | 0.00195 | 0.24543 | 0.01573 | 0.03617 | 0.00088 | 0.379606 | 97  | 158.1  | 149.95 | 229.1  | 5.46  | 222.9  | 12.82 | 260.9  | 38.92  | <b>229.1</b>  |
| 74317_60 | 0.04785 | 0.00392 | 0.00743 | 0.0012  | 0.14617 | 0.0114  | 0.02215 | 0.00062 | 0.358898 | 98  | 90.8   | 184.25 | 141.3  | 3.9   | 138.5  | 10.1  | 149.7  | 24.08  | <b>141.3</b>  |
| 74317_71 | 0.15994 | 0.00905 | 0.11671 | 0.03011 | 9.65061 | 0.53084 | 0.4377  | 0.01047 | 0.434872 | 95  | 2455   | 92.63  | 2340.3 | 46.95 | 2402   | 50.61 | 2231.2 | 545.05 | <b>2455</b>   |
| 74317_72 | 0.08154 | 0.00731 | 0.07351 | 0.01932 | 2.19548 | 0.18748 | 0.1953  | 0.00709 | 0.425127 | 93  | 1234.6 | 166.46 | 1150   | 38.23 | 1179.6 | 59.57 | 1433.8 | 363.68 | <b>1234.6</b> |
| 74317_73 | 0.06008 | 0.00386 | 0.03406 | 0.00895 | 0.7314  | 0.04543 | 0.0883  | 0.00229 | 0.417529 | 102 | 606.5  | 133.35 | 545.5  | 13.55 | 557.4  | 26.65 | 677    | 174.95 | <b>545.5</b>  |
| 74317_74 | 0.09869 | 0.00647 | 0.09978 | 0.02648 | 3.66213 | 0.23097 | 0.26917 | 0.00738 | 0.434718 | 96  | 1599.5 | 117.69 | 1536.6 | 37.47 | 1563.2 | 50.3  | 1922.3 | 486.7  | <b>1599.5</b> |



|                 |         |         |         |         |         |         |         |         |          |     |        |        |        |       |        |       |        |        |               |
|-----------------|---------|---------|---------|---------|---------|---------|---------|---------|----------|-----|--------|--------|--------|-------|--------|-------|--------|--------|---------------|
| <b>74317_75</b> | 0.07514 | 0.00466 | 0.06704 | 0.01787 | 1.93943 | 0.11608 | 0.18723 | 0.00474 | 0.42298  | 103 | 1072.2 | 119.81 | 1106.4 | 25.74 | 1094.8 | 40.1  | 1311.6 | 338.58 | <b>1072.2</b> |
| <b>74317_76</b> | 0.09358 | 0.00584 | 0.08301 | 0.0223  | 2.76186 | 0.16624 | 0.21408 | 0.00544 | 0.422172 | 83  | 1499.6 | 113.68 | 1250.5 | 28.87 | 1345.3 | 44.87 | 1611.8 | 416.15 | <b>1499.6</b> |
| <b>74317_77</b> | 0.07256 | 0.00518 | 0.05052 | 0.01384 | 1.6069  | 0.10998 | 0.16065 | 0.00456 | 0.414724 | 101 | 1001.6 | 138.59 | 960.4  | 25.31 | 972.9  | 42.84 | 996.1  | 266.2  | <b>960.4</b>  |
| <b>74317_78</b> | 0.11515 | 0.00765 | 0.09952 | 0.02715 | 4.58138 | 0.29183 | 0.2886  | 0.00779 | 0.423748 | 87  | 1882.2 | 115.08 | 1634.5 | 38.95 | 1745.9 | 53.09 | 1917.6 | 499.18 | <b>1882.2</b> |
| <b>74317_79</b> | 0.05368 | 0.00397 | 0.01657 | 0.00456 | 0.37661 | 0.02669 | 0.05089 | 0.00144 | 0.399276 | 101 | 357.6  | 158.67 | 320    | 8.81  | 324.5  | 19.69 | 332.2  | 90.59  | <b>320</b>    |
| <b>74317_80</b> | 0.05405 | 0.0044  | 0.01442 | 0.00404 | 0.29413 | 0.02292 | 0.03947 | 0.00119 | 0.386905 | 105 | 373    | 173.82 | 249.6  | 7.38  | 261.8  | 17.98 | 289.4  | 80.51  | <b>249.6</b>  |
| <b>74318_01</b> | 0.06082 | 0.00361 | 0.00929 | 0.0007  | 0.27115 | 0.0155  | 0.03228 | 0.00075 | 0.406449 | 119 | 633    | 122.93 | 204.8  | 4.67  | 243.6  | 12.38 | 186.9  | 14.08  | <b>204.8</b>  |
| <b>74318_02</b> | 0.05432 | 0.00239 | 0.01266 | 0.00069 | 0.31493 | 0.0136  | 0.04202 | 0.00074 | 0.407803 | 105 | 384.4  | 95.3   | 265.3  | 4.56  | 278    | 10.5  | 254.3  | 13.77  | <b>265.3</b>  |
| <b>74318_03</b> | 0.05253 | 0.00129 | 0.01572 | 0.00081 | 0.37466 | 0.00938 | 0.0517  | 0.00075 | 0.579436 | 99  | 308.5  | 54.88  | 325    | 4.59  | 323.1  | 6.93  | 315.3  | 16.05  | <b>325</b>    |
| <b>74318_04</b> | 0.06119 | 0.00533 | 0.00505 | 0.00046 | 0.12455 | 0.01048 | 0.01474 | 0.00041 | 0.330574 | 126 | 646.1  | 176.76 | 94.3   | 2.62  | 119.2  | 9.46  | 101.9  | 9.35   | <b>94.3</b>   |
| <b>74318_05</b> | 0.06404 | 0.00161 | 0.01378 | 0.00094 | 0.58962 | 0.01522 | 0.06669 | 0.00103 | 0.598321 | 113 | 742.8  | 52.31  | 416.2  | 6.24  | 470.6  | 9.72  | 276.7  | 18.82  | <b>416.2</b>  |
| <b>74318_06</b> | 0.05119 | 0.00142 | 0.01193 | 0.00065 | 0.27476 | 0.00772 | 0.0389  | 0.00059 | 0.539807 | 100 | 249.4  | 62.52  | 246    | 3.64  | 246.5  | 6.15  | 239.8  | 13.08  | <b>246</b>    |
| <b>74318_07</b> | 0.04402 | 0.00336 | 0.00461 | 0.00033 | 0.09388 | 0.00708 | 0.01546 | 0.00031 | 0.265884 | 92  | 0.1    | 67.78  | 98.9   | 1.99  | 91.1   | 6.57  | 93     | 6.65   | <b>98.9</b>   |
| <b>74318_08</b> | 0.07592 | 0.00221 | 0.04894 | 0.0047  | 1.80496 | 0.05403 | 0.17222 | 0.00296 | 0.57417  | 94  | 1092.9 | 57.35  | 1024.3 | 16.27 | 1047.3 | 19.56 | 965.8  | 90.55  | <b>1092.9</b> |
| <b>74318_09</b> | 0.06432 | 0.00233 | 0.0239  | 0.00208 | 0.78884 | 0.02843 | 0.08885 | 0.00159 | 0.496537 | 108 | 752.3  | 74.81  | 548.7  | 9.4   | 590.5  | 16.14 | 477.3  | 40.96  | <b>548.7</b>  |
| <b>74318_10</b> | 0.0635  | 0.0013  | 0.04694 | 0.00354 | 0.71467 | 0.0159  | 0.08156 | 0.00122 | 0.672343 | 108 | 724.9  | 42.96  | 505.4  | 7.3   | 547.5  | 9.41  | 927.2  | 68.31  | <b>505.4</b>  |
| <b>74318_11</b> | 0.10303 | 0.00345 | 0.01388 | 0.00093 | 0.48353 | 0.01588 | 0.03402 | 0.00061 | 0.54597  | 186 | 1679.5 | 60.45  | 215.6  | 3.78  | 400.5  | 10.87 | 278.6  | 18.57  | <b>215.6</b>  |
| <b>74318_12</b> | 0.05305 | 0.00184 | 0.01222 | 0.00086 | 0.2936  | 0.01026 | 0.04011 | 0.00066 | 0.470869 | 103 | 331    | 76.9   | 253.5  | 4.12  | 261.4  | 8.05  | 245.5  | 17.13  | <b>253.5</b>  |
| <b>74318_13</b> | 0.05348 | 0.00248 | 0.01243 | 0.00136 | 0.36635 | 0.0167  | 0.04964 | 0.00094 | 0.415409 | 101 | 349    | 101.2  | 312.3  | 5.79  | 316.9  | 12.41 | 249.6  | 27.05  | <b>312.3</b>  |
| <b>74318_14</b> | 0.05684 | 0.00297 | 0.00561 | 0.00055 | 0.13673 | 0.00704 | 0.01744 | 0.00036 | 0.40091  | 117 | 484.5  | 112.14 | 111.5  | 2.29  | 130.1  | 6.29  | 113    | 11.13  | <b>111.5</b>  |
| <b>74318_15</b> | 0.05431 | 0.00203 | 0.01785 | 0.00203 | 0.44026 | 0.01627 | 0.0588  | 0.00107 | 0.492411 | 101 | 383.9  | 81.28  | 368.3  | 6.49  | 370.4  | 11.47 | 357.6  | 40.39  | <b>368.3</b>  |
| <b>74318_16</b> | 0.0631  | 0.00252 | 0.00746 | 0.00092 | 0.21166 | 0.0083  | 0.02433 | 0.00046 | 0.482144 | 126 | 711.6  | 82.67  | 155    | 2.9   | 194.9  | 6.95  | 150.2  | 18.52  | <b>155</b>    |
| <b>74318_17</b> | 0.09392 | 0.00302 | 0.06981 | 0.00818 | 3.25254 | 0.10409 | 0.25119 | 0.00443 | 0.55108  | 96  | 1506.6 | 59.49  | 1444.6 | 22.83 | 1469.8 | 24.85 | 1363.9 | 154.59 | <b>1506.6</b> |
| <b>74318_18</b> | 0.05303 | 0.0032  | 0.01545 | 0.00273 | 0.32855 | 0.01916 | 0.04494 | 0.00106 | 0.404463 | 102 | 329.8  | 130.5  | 283.4  | 6.55  | 288.5  | 14.65 | 309.9  | 54.25  | <b>283.4</b>  |
| <b>74318_19</b> | 0.11053 | 0.00434 | 0.08235 | 0.01252 | 4.71976 | 0.1824  | 0.30973 | 0.00607 | 0.507108 | 96  | 1808.1 | 69.71  | 1739.4 | 29.86 | 1770.8 | 32.38 | 1599.5 | 233.9  | <b>1808.1</b> |
| <b>74318_20</b> | 0.05015 | 0.00198 | 0.00519 | 0.00053 | 0.11873 | 0.00462 | 0.01717 | 0.0003  | 0.449024 | 104 | 202    | 89.01  | 109.7  | 1.88  | 113.9  | 4.19  | 104.6  | 10.68  | <b>109.7</b>  |
| <b>74318_21</b> | 0.05032 | 0.00194 | 0.01195 | 0.00168 | 0.28243 | 0.01074 | 0.04072 | 0.00076 | 0.490809 | 98  | 209.7  | 86.92  | 257.3  | 4.7   | 252.6  | 8.5   | 240.1  | 33.63  | <b>257.3</b>  |
| <b>74318_22</b> | 0.05081 | 0.00584 | 0.01221 | 0.00287 | 0.28699 | 0.03174 | 0.04096 | 0.00152 | 0.335539 | 99  | 232.2  | 244.86 | 258.8  | 9.39  | 256.2  | 25.04 | 245.3  | 57.25  | <b>258.8</b>  |
| <b>74318_23</b> | 0.04863 | 0.002   | 0.00549 | 0.00071 | 0.11581 | 0.00467 | 0.01727 | 0.00032 | 0.459501 | 101 | 130.2  | 93.75  | 110.4  | 2.03  | 111.3  | 4.25  | 110.6  | 14.3   | <b>110.4</b>  |
| <b>74318_24</b> | 0.05777 | 0.00221 | 0.00545 | 0.00058 | 0.13222 | 0.00497 | 0.0166  | 0.00029 | 0.464762 | 119 | 521    | 82.01  | 106.1  | 1.84  | 126.1  | 4.45  | 109.9  | 11.56  | <b>106.1</b>  |
| <b>74318_25</b> | 0.05715 | 0.0045  | 0.01175 | 0.00258 | 0.34658 | 0.02623 | 0.04401 | 0.00129 | 0.387296 | 109 | 496.8  | 165.07 | 277.6  | 7.97  | 302.1  | 19.78 | 236.1  | 51.63  | <b>277.6</b>  |
| <b>74318_26</b> | 0.05884 | 0.00276 | 0.02969 | 0.00336 | 0.75109 | 0.03437 | 0.09257 | 0.00176 | 0.415485 | 100 | 561.3  | 98.91  | 570.7  | 10.39 | 568.9  | 19.93 | 591.4  | 65.95  | <b>570.7</b>  |
| <b>74318_27</b> | 0.08066 | 0.00259 | 0.05661 | 0.00622 | 2.16234 | 0.06865 | 0.19441 | 0.00329 | 0.533041 | 94  | 1213.2 | 61.79  | 1145.2 | 17.77 | 1169   | 22.04 | 1113.1 | 119    | <b>1213.2</b> |

|          |         |         |         |         |         |         |         |         |          |     |        |        |        |       |        |       |        |        |               |
|----------|---------|---------|---------|---------|---------|---------|---------|---------|----------|-----|--------|--------|--------|-------|--------|-------|--------|--------|---------------|
| 74318_28 | 0.05205 | 0.00195 | 0.01564 | 0.00178 | 0.36555 | 0.01347 | 0.05094 | 0.00088 | 0.468817 | 99  | 287.5  | 83.32  | 320.3  | 5.37  | 316.3  | 10.02 | 313.7  | 35.38  | <b>320.3</b>  |
| 74318_29 | 0.06845 | 0.00474 | 0.03064 | 0.00742 | 1.03189 | 0.069   | 0.10938 | 0.003   | 0.410174 | 108 | 882.2  | 137.11 | 669.1  | 17.43 | 719.9  | 34.48 | 610    | 145.47 | <b>669.1</b>  |
| 74318_30 | 0.11992 | 0.00635 | 0.08918 | 0.01995 | 4.93885 | 0.25517 | 0.29865 | 0.00682 | 0.441996 | 86  | 1955   | 91.62  | 1684.6 | 33.85 | 1808.9 | 43.63 | 1726.6 | 370.23 | <b>1955</b>   |
| 74318_31 | 0.0628  | 0.00394 | 0.03073 | 0.00851 | 0.89983 | 0.05486 | 0.10391 | 0.0026  | 0.410413 | 102 | 701.6  | 128.23 | 637.3  | 15.19 | 651.6  | 29.32 | 611.7  | 166.79 | <b>637.3</b>  |
| 74318_32 | 0.0572  | 0.0028  | 0.02367 | 0.00498 | 0.62122 | 0.0298  | 0.07877 | 0.00164 | 0.434022 | 100 | 498.9  | 105.01 | 488.8  | 9.83  | 490.6  | 18.66 | 472.9  | 98.42  | <b>488.8</b>  |
| 74318_33 | 0.05142 | 0.00333 | 0.00607 | 0.00133 | 0.14661 | 0.00925 | 0.02068 | 0.00048 | 0.367885 | 105 | 259.7  | 142.43 | 132    | 3.05  | 138.9  | 8.19  | 122.3  | 26.64  | <b>132</b>    |
| 74318_34 | 0.05658 | 0.00328 | 0.02309 | 0.00532 | 0.58411 | 0.03292 | 0.07488 | 0.00171 | 0.405196 | 100 | 474.6  | 124.12 | 465.5  | 10.26 | 467.1  | 21.1  | 461.4  | 105.07 | <b>465.5</b>  |
| 74318_35 | 0.05128 | 0.00273 | 0.01202 | 0.00262 | 0.281   | 0.01455 | 0.03974 | 0.00086 | 0.41794  | 100 | 253.5  | 117.81 | 251.2  | 5.35  | 251.5  | 11.53 | 241.4  | 52.41  | <b>251.2</b>  |
| 74318_36 | 0.05354 | 0.00332 | 0.01752 | 0.00408 | 0.41714 | 0.02507 | 0.05651 | 0.00132 | 0.388666 | 100 | 351.6  | 133.68 | 354.4  | 8.08  | 354    | 17.96 | 351    | 81.08  | <b>354.4</b>  |
| 74318_37 | 0.07641 | 0.00414 | 0.05113 | 0.01213 | 1.8146  | 0.09537 | 0.17225 | 0.00381 | 0.420857 | 93  | 1105.8 | 104.68 | 1024.5 | 20.95 | 1050.7 | 34.41 | 1007.8 | 233.25 | <b>1105.8</b> |
| 74318_38 | 0.07856 | 0.00416 | 0.05474 | 0.01289 | 1.81054 | 0.093   | 0.16716 | 0.00362 | 0.421601 | 105 | 1161.1 | 101.56 | 996.5  | 20.02 | 1049.3 | 33.6  | 1077.2 | 247.07 | <b>996.5</b>  |
| 74318_39 | 0.05976 | 0.0031  | 0.02983 | 0.00666 | 0.83538 | 0.04207 | 0.10139 | 0.00218 | 0.426946 | 99  | 594.7  | 108.99 | 622.5  | 12.75 | 616.6  | 23.27 | 594.2  | 130.69 | <b>622.5</b>  |
| 74318_40 | 0.05878 | 0.00308 | 0.02657 | 0.00588 | 0.72905 | 0.03706 | 0.08997 | 0.00194 | 0.424186 | 100 | 559    | 110.41 | 555.3  | 11.49 | 556    | 21.76 | 530    | 115.84 | <b>555.3</b>  |
| 74318_41 | 0.05117 | 0.00281 | 0.01332 | 0.00304 | 0.3042  | 0.01615 | 0.04312 | 0.00095 | 0.414984 | 99  | 248.3  | 121.48 | 272.2  | 5.87  | 269.7  | 12.58 | 267.4  | 60.67  | <b>272.2</b>  |
| 74318_42 | 0.07671 | 0.00211 | 0.04443 | 0.00216 | 1.80238 | 0.0483  | 0.17053 | 0.00283 | 0.619277 | 91  | 1113.6 | 53.85  | 1015   | 15.58 | 1046.3 | 17.5  | 878.7  | 41.87  | <b>1113.6</b> |
| 74318_43 | 0.05953 | 0.00103 | 0.02838 | 0.00131 | 0.8022  | 0.0146  | 0.09779 | 0.00134 | 0.752905 | 99  | 586.5  | 37.09  | 601.4  | 7.88  | 598.1  | 8.22  | 565.6  | 25.67  | <b>601.4</b>  |
| 74318_44 | 0.1654  | 0.00289 | 0.05114 | 0.00297 | 4.15331 | 0.07749 | 0.18221 | 0.00265 | 0.779511 | 43  | 2511.7 | 29.05  | 1079.1 | 14.44 | 1664.9 | 15.27 | 1008.1 | 57.15  | <b>2511.7</b> |
| 74318_45 | 0.07763 | 0.00143 | 0.03725 | 0.0022  | 1.72423 | 0.03387 | 0.16116 | 0.00236 | 0.745478 | 106 | 1137.5 | 36.28  | 963.2  | 13.1  | 1017.6 | 12.63 | 739.2  | 42.93  | <b>963.2</b>  |
| 74318_46 | 0.05782 | 0.0021  | 0.03343 | 0.002   | 0.60323 | 0.02101 | 0.0757  | 0.00139 | 0.5272   | 102 | 522.6  | 77.84  | 470.4  | 8.34  | 479.3  | 13.31 | 664.7  | 39.1   | <b>470.4</b>  |
| 74318_47 | 0.06333 | 0.00298 | 0.01131 | 0.00084 | 0.30903 | 0.01381 | 0.0354  | 0.00079 | 0.49938  | 122 | 719.2  | 96.9   | 224.3  | 4.93  | 273.4  | 10.72 | 227.4  | 16.84  | <b>224.3</b>  |
| 74318_49 | 0.05185 | 0.00182 | 0.0122  | 0.00075 | 0.29307 | 0.01005 | 0.041   | 0.00072 | 0.512099 | 101 | 278.9  | 78.47  | 259    | 4.43  | 261    | 7.89  | 245    | 14.92  | <b>259</b>    |
| 74318_50 | 0.10566 | 0.00352 | 0.06397 | 0.00724 | 3.65315 | 0.12136 | 0.25079 | 0.00503 | 0.60374  | 84  | 1725.9 | 59.92  | 1442.5 | 25.9  | 1561.2 | 26.48 | 1253.3 | 137.51 | <b>1725.9</b> |
| 74318_51 | 0.05988 | 0.00219 | 0.02443 | 0.00185 | 0.68522 | 0.02442 | 0.083   | 0.00158 | 0.53415  | 103 | 599.2  | 77.34  | 514    | 9.4   | 529.9  | 14.71 | 487.9  | 36.42  | <b>514</b>    |
| 74318_52 | 0.05654 | 0.00154 | 0.016   | 0.00117 | 0.39375 | 0.01075 | 0.05051 | 0.00083 | 0.601884 | 106 | 472.7  | 59.54  | 317.7  | 5.09  | 337.1  | 7.83  | 320.7  | 23.24  | <b>317.7</b>  |
| 74318_53 | 0.06804 | 0.00168 | 0.03561 | 0.00308 | 1.11533 | 0.0285  | 0.11889 | 0.00196 | 0.645163 | 105 | 869.7  | 50.46  | 724.2  | 11.32 | 760.7  | 13.68 | 707.2  | 60.06  | <b>724.2</b>  |
| 74318_54 | 0.05154 | 0.00154 | 0.01132 | 0.00121 | 0.28819 | 0.00844 | 0.04055 | 0.00068 | 0.572604 | 100 | 264.9  | 67.34  | 256.2  | 4.22  | 257.1  | 6.66  | 227.6  | 24.15  | <b>256.2</b>  |
| 74318_55 | 0.05265 | 0.0023  | 0.01058 | 0.00139 | 0.2994  | 0.01256 | 0.04122 | 0.00086 | 0.497339 | 102 | 313.9  | 96.46  | 260.4  | 5.34  | 265.9  | 9.81  | 212.7  | 27.88  | <b>260.4</b>  |
| 74318_56 | 0.08643 | 0.00383 | 0.05142 | 0.00799 | 2.2841  | 0.09607 | 0.19161 | 0.00436 | 0.540998 | 84  | 1347.7 | 83.18  | 1130.1 | 23.57 | 1207.4 | 29.7  | 1013.4 | 153.63 | <b>1347.7</b> |
| 74318_57 | 0.06057 | 0.00184 | 0.02229 | 0.00277 | 0.76408 | 0.02263 | 0.09147 | 0.00159 | 0.586912 | 102 | 624.1  | 64.14  | 564.2  | 9.39  | 576.4  | 13.02 | 445.6  | 54.67  | <b>564.2</b>  |
| 74318_58 | 0.07806 | 0.00219 | 0.05298 | 0.0062  | 2.0803  | 0.05694 | 0.19329 | 0.00319 | 0.602962 | 99  | 1148.3 | 54.8   | 1139.2 | 17.25 | 1142.3 | 18.77 | 1043.5 | 119.01 | <b>1148.3</b> |
| 74318_59 | 0.15733 | 0.00714 | 0.0828  | 0.01437 | 6.29646 | 0.27081 | 0.2902  | 0.00661 | 0.529585 | 68  | 2427.2 | 74.96  | 1642.5 | 33.02 | 2018   | 37.69 | 1608   | 268.19 | <b>2427.2</b> |
| 74318_60 | 0.07468 | 0.00217 | 0.04758 | 0.00588 | 1.78745 | 0.05047 | 0.17359 | 0.00291 | 0.593703 | 97  | 1059.9 | 57.47  | 1031.8 | 15.96 | 1040.9 | 18.39 | 939.6  | 113.44 | <b>1059.9</b> |
| 74318_61 | 0.06638 | 0.00317 | 0.01207 | 0.00158 | 0.36684 | 0.01656 | 0.04008 | 0.0009  | 0.497429 | 125 | 818.5  | 96.81  | 253.3  | 5.56  | 317.3  | 12.3  | 242.5  | 31.62  | <b>253.3</b>  |

|                 |         |         |         |         |         |         |         |         |          |     |        |        |        |       |        |       |        |        |               |
|-----------------|---------|---------|---------|---------|---------|---------|---------|---------|----------|-----|--------|--------|--------|-------|--------|-------|--------|--------|---------------|
| <b>74318_62</b> | 0.04808 | 0.002   | 0.00539 | 0.00065 | 0.13122 | 0.00524 | 0.0198  | 0.00038 | 0.480604 | 99  | 103    | 95.47  | 126.4  | 2.4   | 125.2  | 4.71  | 108.6  | 13.08  | <b>126.4</b>  |
| <b>74318_63</b> | 0.05487 | 0.00209 | 0.02311 | 0.00282 | 0.63466 | 0.02319 | 0.08389 | 0.00157 | 0.512189 | 96  | 406.8  | 82.44  | 519.3  | 9.37  | 499    | 14.4  | 461.9  | 55.73  | <b>519.3</b>  |
| <b>74318_64</b> | 0.04744 | 0.00297 | 0.00912 | 0.00127 | 0.21976 | 0.01321 | 0.0336  | 0.0008  | 0.396092 | 95  | 70.8   | 143.3  | 213    | 5     | 201.7  | 10.99 | 183.5  | 25.34  | <b>213</b>    |
| <b>74318_65</b> | 0.05477 | 0.00326 | 0.01156 | 0.00198 | 0.35874 | 0.02005 | 0.0475  | 0.00124 | 0.467082 | 104 | 403    | 127.68 | 299.1  | 7.66  | 311.3  | 14.99 | 232.3  | 39.51  | <b>299.1</b>  |
| <b>74318_66</b> | 0.14255 | 0.00536 | 0.05644 | 0.0083  | 3.82301 | 0.13629 | 0.19448 | 0.00382 | 0.550972 | 51  | 2258.5 | 63.49  | 1145.6 | 20.62 | 1597.6 | 28.69 | 1109.8 | 158.88 | <b>2258.5</b> |
| <b>74318_67</b> | 0.05855 | 0.00271 | 0.03544 | 0.00731 | 0.67451 | 0.02966 | 0.08353 | 0.00186 | 0.506393 | 101 | 550.4  | 98.12  | 517.2  | 11.05 | 523.4  | 17.99 | 704    | 142.71 | <b>517.2</b>  |
| <b>74318_68</b> | 0.07984 | 0.00481 | 0.03022 | 0.00708 | 1.81261 | 0.10191 | 0.16457 | 0.00448 | 0.484189 | 107 | 1193   | 114.35 | 982.1  | 24.81 | 1050   | 36.79 | 601.8  | 138.88 | <b>982.1</b>  |
| <b>74318_70</b> | 0.05985 | 0.00707 | 0.02326 | 0.01023 | 0.67246 | 0.07364 | 0.08149 | 0.00397 | 0.444876 | 103 | 598.2  | 237.12 | 505    | 23.69 | 522.2  | 44.71 | 464.7  | 202.09 | <b>505</b>    |
| <b>74318_71</b> | 0.0694  | 0.00403 | 0.00875 | 0.00178 | 0.25798 | 0.01408 | 0.02695 | 0.0007  | 0.475908 | 136 | 910.7  | 115.15 | 171.5  | 4.38  | 233    | 11.36 | 176.1  | 35.73  | <b>171.5</b>  |
| <b>74318_72</b> | 0.17222 | 0.00747 | 0.10247 | 0.0186  | 7.50304 | 0.30812 | 0.31593 | 0.00671 | 0.517189 | 69  | 2579.4 | 70.72  | 1769.8 | 32.89 | 2173.4 | 36.79 | 1971.8 | 341.02 | <b>2579.4</b> |
| <b>74318_73</b> | 0.05986 | 0.00589 | 0.0054  | 0.00116 | 0.12938 | 0.01214 | 0.01567 | 0.00053 | 0.360459 | 123 | 598.6  | 199.93 | 100.2  | 3.38  | 123.5  | 10.91 | 108.9  | 23.31  | <b>100.2</b>  |
| <b>74318_74</b> | 0.05985 | 0.00497 | 0.01266 | 0.00361 | 0.30385 | 0.02356 | 0.03681 | 0.00128 | 0.448465 | 116 | 598    | 170.31 | 233    | 7.93  | 269.4  | 18.35 | 254.2  | 72     | <b>233</b>    |
| <b>74318_75</b> | 0.12386 | 0.00578 | 0.06806 | 0.01293 | 4.71517 | 0.20714 | 0.27607 | 0.00605 | 0.49885  | 78  | 2012.6 | 80.49  | 1571.6 | 30.54 | 1769.9 | 36.8  | 1330.8 | 244.6  | <b>2012.6</b> |
| <b>74318_76</b> | 0.05724 | 0.00371 | 0.00721 | 0.00142 | 0.19141 | 0.01169 | 0.02425 | 0.00064 | 0.432134 | 115 | 500.3  | 137.04 | 154.5  | 4.02  | 177.8  | 9.96  | 145.3  | 28.45  | <b>154.5</b>  |
| <b>74318_77</b> | 0.06552 | 0.00337 | 0.03382 | 0.00623 | 1.14951 | 0.05563 | 0.12726 | 0.00297 | 0.482246 | 101 | 791    | 104.33 | 772.2  | 16.99 | 777    | 26.28 | 672.3  | 121.77 | <b>772.2</b>  |
| <b>74318_78</b> | 0.10733 | 0.00643 | 0.01425 | 0.00283 | 0.46209 | 0.02553 | 0.03122 | 0.00086 | 0.498587 | 195 | 1754.6 | 105.75 | 198.2  | 5.39  | 385.7  | 17.73 | 286.1  | 56.39  | <b>198.2</b>  |
| <b>74318_79</b> | 0.0656  | 0.00435 | 0.03038 | 0.00793 | 0.92862 | 0.05767 | 0.10264 | 0.00296 | 0.464369 | 106 | 793.7  | 133.37 | 629.9  | 17.3  | 666.9  | 30.36 | 605    | 155.47 | <b>629.9</b>  |
| <b>74318_80</b> | 0.05293 | 0.00326 | 0.01189 | 0.00242 | 0.30561 | 0.01759 | 0.04188 | 0.00109 | 0.452191 | 102 | 325.6  | 133.32 | 264.5  | 6.74  | 270.8  | 13.68 | 238.8  | 48.33  | <b>264.5</b>  |
| <b>74319_01</b> | 0.0513  | 0.00274 | 0.00581 | 0.00032 | 0.14228 | 0.0074  | 0.02012 | 0.00036 | 0.344022 | 105 | 254.3  | 118.08 | 128.4  | 2.29  | 135.1  | 6.58  | 117.1  | 6.34   | <b>128.4</b>  |
| <b>74319_02</b> | 0.05983 | 0.00146 | 0.02651 | 0.00146 | 0.76767 | 0.01859 | 0.09307 | 0.00129 | 0.572368 | 101 | 597.3  | 51.83  | 573.7  | 7.62  | 578.4  | 10.68 | 528.9  | 28.79  | <b>573.7</b>  |
| <b>74319_03</b> | 0.05743 | 0.00313 | 0.00595 | 0.00037 | 0.15832 | 0.00838 | 0.02    | 0.00038 | 0.358959 | 117 | 507.6  | 116.05 | 127.6  | 2.41  | 149.2  | 7.35  | 120    | 7.47   | <b>127.6</b>  |
| <b>74319_04</b> | 0.04944 | 0.00525 | 0.0076  | 0.00071 | 0.16243 | 0.01677 | 0.02383 | 0.00068 | 0.276387 | 101 | 168.6  | 231.47 | 151.8  | 4.27  | 152.8  | 14.64 | 153    | 14.23  | <b>151.8</b>  |
| <b>74319_05</b> | 0.05386 | 0.00195 | 0.00619 | 0.00037 | 0.14732 | 0.00521 | 0.01984 | 0.00031 | 0.441819 | 110 | 365    | 79.32  | 126.6  | 1.95  | 139.5  | 4.61  | 124.7  | 7.41   | <b>126.6</b>  |
| <b>74319_06</b> | 0.0622  | 0.00155 | 0.02805 | 0.00171 | 0.84086 | 0.02072 | 0.09804 | 0.00137 | 0.567089 | 103 | 681    | 52.24  | 602.9  | 8.02  | 619.6  | 11.43 | 559.2  | 33.55  | <b>602.9</b>  |
| <b>74319_07</b> | 0.05652 | 0.00122 | 0.02531 | 0.00162 | 0.66421 | 0.01451 | 0.08524 | 0.00114 | 0.612209 | 98  | 472    | 47.75  | 527.3  | 6.8   | 517.2  | 8.85  | 505.2  | 31.95  | <b>527.3</b>  |
| <b>74319_08</b> | 0.05118 | 0.00218 | 0.00626 | 0.00044 | 0.14457 | 0.00603 | 0.02049 | 0.00034 | 0.39783  | 105 | 248.8  | 95.34  | 130.7  | 2.12  | 137.1  | 5.35  | 126.1  | 8.88   | <b>130.7</b>  |
| <b>74319_09</b> | 0.05476 | 0.0033  | 0.00553 | 0.00063 | 0.12746 | 0.00733 | 0.01688 | 0.00037 | 0.381153 | 113 | 402.6  | 129.01 | 107.9  | 2.32  | 121.8  | 6.6   | 111.5  | 12.65  | <b>107.9</b>  |
| <b>74319_10</b> | 0.06032 | 0.00155 | 0.02921 | 0.00209 | 0.78171 | 0.01995 | 0.09398 | 0.00134 | 0.558692 | 101 | 615.2  | 54.53  | 579    | 7.91  | 586.5  | 11.37 | 581.9  | 41.09  | <b>579</b>    |
| <b>74319_11</b> | 0.04855 | 0.00475 | 0.00568 | 0.00064 | 0.12045 | 0.01143 | 0.01799 | 0.00048 | 0.281171 | 100 | 126.4  | 215.3  | 115    | 3.06  | 115.5  | 10.36 | 114.4  | 12.84  | <b>115</b>    |
| <b>74319_12</b> | 0.05297 | 0.00137 | 0.01714 | 0.00135 | 0.39028 | 0.01    | 0.05343 | 0.00075 | 0.547838 | 100 | 327.6  | 57.66  | 335.6  | 4.57  | 334.6  | 7.3   | 343.5  | 26.74  | <b>335.6</b>  |
| <b>74319_13</b> | 0.0766  | 0.00247 | 0.05679 | 0.00647 | 1.97111 | 0.06217 | 0.18662 | 0.00303 | 0.379584 | 99  | 1110.8 | 63.19  | 1103.1 | 16.46 | 1105.7 | 21.25 | 1116.4 | 123.73 | <b>1110.8</b> |
| <b>74319_14</b> | 0.05552 | 0.00423 | 0.00701 | 0.0013  | 0.19031 | 0.01391 | 0.02487 | 0.00069 | 0.416448 | 112 | 432.9  | 161.35 | 158.4  | 4.33  | 176.9  | 11.87 | 141.2  | 26.18  | <b>158.4</b>  |
| <b>74319_15</b> | 0.05212 | 0.00233 | 0.01638 | 0.00199 | 0.35844 | 0.01553 | 0.04988 | 0.0009  | 0.493743 | 99  | 290.7  | 98.82  | 313.8  | 5.53  | 311.1  | 11.61 | 328.4  | 39.52  | <b>313.8</b>  |



|                 |         |         |         |         |          |         |         |         |          |     |        |        |        |       |        |       |        |        |               |
|-----------------|---------|---------|---------|---------|----------|---------|---------|---------|----------|-----|--------|--------|--------|-------|--------|-------|--------|--------|---------------|
| <b>74319_16</b> | 0.05887 | 0.00192 | 0.0284  | 0.00347 | 0.71645  | 0.02285 | 0.08827 | 0.00139 | 0.420294 | 101 | 562.3  | 69.4   | 545.3  | 8.24  | 548.6  | 13.52 | 566    | 68.17  | <b>545.3</b>  |
| <b>74319_17</b> | 0.05962 | 0.00323 | 0.05327 | 0.01151 | 0.73854  | 0.03871 | 0.08988 | 0.00198 | 0.448838 | 101 | 589.8  | 113.51 | 554.8  | 11.7  | 561.6  | 22.61 | 1049.1 | 220.84 | <b>554.8</b>  |
| <b>74319_18</b> | 0.06197 | 0.00269 | 0.02705 | 0.00395 | 0.79341  | 0.0335  | 0.09287 | 0.00176 | 0.466721 | 104 | 672.9  | 90.38  | 572.5  | 10.38 | 593.1  | 18.96 | 539.4  | 77.68  | <b>572.5</b>  |
| <b>74319_19</b> | 0.14898 | 0.00542 | 0.08057 | 0.01294 | 6.00537  | 0.21168 | 0.29238 | 0.00481 | 0.393187 | 71  | 2334.2 | 61.04  | 1653.4 | 24.01 | 1976.6 | 30.68 | 1566.2 | 242.12 | <b>2334.2</b> |
| <b>74319_20</b> | 0.06014 | 0.00314 | 0.02686 | 0.00369 | 0.75088  | 0.03795 | 0.09058 | 0.0018  | 0.482028 | 102 | 608.8  | 109.06 | 558.9  | 10.66 | 568.7  | 22.01 | 535.8  | 72.58  | <b>558.9</b>  |
| <b>74319_21</b> | 0.08093 | 0.00284 | 0.05964 | 0.00872 | 2.19543  | 0.07498 | 0.19681 | 0.00324 | 0.491476 | 95  | 1219.8 | 67.45  | 1158.1 | 17.44 | 1179.6 | 23.82 | 1170.8 | 166.34 | <b>1219.8</b> |
| <b>74319_22</b> | 0.06824 | 0.00237 | 0.04462 | 0.00659 | 1.41542  | 0.04805 | 0.15044 | 0.00251 | 0.503585 | 99  | 875.8  | 70.28  | 903.4  | 14.08 | 895.4  | 20.2  | 882.4  | 127.57 | <b>903.4</b>  |
| <b>74319_23</b> | 0.07273 | 0.00238 | 0.04942 | 0.00692 | 1.61363  | 0.05156 | 0.16096 | 0.00259 | 0.473022 | 101 | 1006.4 | 64.93  | 962.1  | 14.36 | 975.5  | 20.03 | 975.1  | 133.21 | <b>962.1</b>  |
| <b>74319_24</b> | 0.10125 | 0.00466 | 0.07972 | 0.01313 | 3.83896  | 0.16994 | 0.27508 | 0.00576 | 0.481401 | 95  | 1647.1 | 83.04  | 1566.5 | 29.11 | 1601   | 35.66 | 1550.4 | 245.73 | <b>1647.1</b> |
| <b>74319_25</b> | 0.05002 | 0.00167 | 0.01135 | 0.00058 | 0.24871  | 0.00836 | 0.03607 | 0.00061 | 0.503119 | 99  | 195.9  | 75.95  | 228.4  | 3.8   | 225.5  | 6.8   | 228.1  | 11.61  | <b>228.4</b>  |
| <b>74319_26</b> | 0.0644  | 0.00107 | 0.04195 | 0.00193 | 0.99955  | 0.01839 | 0.11261 | 0.00159 | 0.767437 | 102 | 754.7  | 34.7   | 687.9  | 9.23  | 703.6  | 9.34  | 830.6  | 37.49  | <b>687.9</b>  |
| <b>74319_27</b> | 0.0598  | 0.0012  | 0.02669 | 0.0011  | 0.77735  | 0.0166  | 0.09431 | 0.00139 | 0.690185 | 101 | 596.4  | 42.75  | 581    | 8.18  | 584    | 9.49  | 532.5  | 21.64  | <b>581</b>    |
| <b>74319_28</b> | 0.1186  | 0.00172 | 0.09118 | 0.00402 | 5.60156  | 0.09403 | 0.34267 | 0.00481 | 0.836203 | 98  | 1935.2 | 25.73  | 1899.5 | 23.08 | 1916.3 | 14.46 | 1763.7 | 74.41  | <b>1935.2</b> |
| <b>74319_29</b> | 0.05282 | 0.0011  | 0.01288 | 0.00064 | 0.31997  | 0.00705 | 0.04394 | 0.00064 | 0.661059 | 102 | 321.2  | 46.42  | 277.2  | 3.98  | 281.9  | 5.42  | 258.6  | 12.72  | <b>277.2</b>  |
| <b>74319_30</b> | 0.05497 | 0.00164 | 0.01298 | 0.00068 | 0.35287  | 0.01066 | 0.04657 | 0.00076 | 0.540213 | 105 | 410.8  | 64.7   | 293.4  | 4.7   | 306.9  | 8     | 260.7  | 13.67  | <b>293.4</b>  |
| <b>74319_31</b> | 0.16475 | 0.00733 | 0.06049 | 0.00579 | 1.70601  | 0.07005 | 0.07514 | 0.00183 | 0.593135 | 216 | 2505   | 72.97  | 467    | 10.97 | 1010.8 | 26.29 | 1187   | 110.32 | <b>467</b>    |
| <b>74319_32</b> | 0.05108 | 0.00159 | 0.00885 | 0.00068 | 0.25147  | 0.00798 | 0.03572 | 0.00062 | 0.54697  | 101 | 244.2  | 70.11  | 226.2  | 3.85  | 227.8  | 6.47  | 178    | 13.53  | <b>226.2</b>  |
| <b>74319_33</b> | 0.06016 | 0.00287 | 0.01482 | 0.00112 | 0.40109  | 0.01863 | 0.04836 | 0.00097 | 0.431832 | 112 | 609.4  | 100    | 304.4  | 5.95  | 342.4  | 13.5  | 297.4  | 22.33  | <b>304.4</b>  |
| <b>74319_34</b> | 0.05935 | 0.0029  | 0.00694 | 0.00052 | 0.19351  | 0.00921 | 0.02365 | 0.0005  | 0.444204 | 119 | 580.1  | 102.76 | 150.7  | 3.17  | 179.6  | 7.84  | 139.9  | 10.48  | <b>150.7</b>  |
| <b>74319_35</b> | 0.04942 | 0.00225 | 0.00721 | 0.00044 | 0.17296  | 0.00781 | 0.02539 | 0.00046 | 0.401227 | 100 | 168    | 102.9  | 161.6  | 2.87  | 162    | 6.76  | 145.2  | 8.82   | <b>161.6</b>  |
| <b>74319_36</b> | 0.08945 | 0.00219 | 0.05338 | 0.00414 | 2.74785  | 0.07095 | 0.22284 | 0.0037  | 0.643057 | 92  | 1413.7 | 46.05  | 1296.8 | 19.5  | 1341.5 | 19.22 | 1051   | 79.49  | <b>1413.7</b> |
| <b>74319_37</b> | 0.05223 | 0.00164 | 0.00816 | 0.00071 | 0.22348  | 0.00721 | 0.03103 | 0.00054 | 0.539406 | 104 | 295.7  | 70.16  | 197    | 3.39  | 204.8  | 5.98  | 164.2  | 14.17  | <b>197</b>    |
| <b>74319_38</b> | 0.06699 | 0.00361 | 0.00564 | 0.00087 | 0.16128  | 0.00835 | 0.01746 | 0.00039 | 0.431434 | 136 | 837.3  | 108.37 | 111.6  | 2.46  | 151.8  | 7.3   | 113.6  | 17.39  | <b>111.6</b>  |
| <b>74319_39</b> | 0.04946 | 0.00278 | 0.00504 | 0.00068 | 0.13262  | 0.00726 | 0.01945 | 0.00044 | 0.413243 | 102 | 169.9  | 126.03 | 124.2  | 2.75  | 126.5  | 6.51  | 101.6  | 13.66  | <b>124.2</b>  |
| <b>74319_40</b> | 0.20382 | 0.00481 | 0.14225 | 0.01352 | 15.68809 | 0.38686 | 0.55833 | 0.00885 | 0.642789 | 100 | 2857   | 37.92  | 2859.7 | 36.6  | 2858   | 23.54 | 2688.1 | 239.25 | <b>2857</b>   |
| <b>74319_41</b> | 0.04859 | 0.00345 | 0.00539 | 0.00087 | 0.11261  | 0.00779 | 0.01681 | 0.00042 | 0.361178 | 101 | 128.1  | 159.2  | 107.5  | 2.65  | 108.4  | 7.11  | 108.6  | 17.57  | <b>107.5</b>  |
| <b>74319_42</b> | 0.07961 | 0.00226 | 0.05264 | 0.00508 | 2.14913  | 0.06204 | 0.19582 | 0.00329 | 0.582009 | 97  | 1187.4 | 55.15  | 1152.8 | 17.71 | 1164.8 | 20    | 1036.9 | 97.5   | <b>1187.4</b> |
| <b>74319_43</b> | 0.05898 | 0.00395 | 0.00568 | 0.00087 | 0.14141  | 0.00914 | 0.01739 | 0.00044 | 0.39146  | 121 | 566.4  | 139.44 | 111.1  | 2.82  | 134.3  | 8.13  | 114.4  | 17.56  | <b>111.1</b>  |
| <b>74319_44</b> | 0.06873 | 0.00454 | 0.01137 | 0.00186 | 0.36181  | 0.023   | 0.03819 | 0.00101 | 0.41603  | 130 | 890.6  | 130.84 | 241.6  | 6.27  | 313.6  | 17.15 | 228.4  | 37.14  | <b>241.6</b>  |
| <b>74319_45</b> | 0.06563 | 0.00245 | 0.03745 | 0.00551 | 1.17971  | 0.04376 | 0.1304  | 0.00247 | 0.510643 | 100 | 794.6  | 76.34  | 790.1  | 14.11 | 791.2  | 20.39 | 743.2  | 107.34 | <b>790.1</b>  |
| <b>74319_46</b> | 0.06124 | 0.00658 | 0.00474 | 0.00081 | 0.14676  | 0.01526 | 0.01738 | 0.00058 | 0.320946 | 125 | 647.8  | 215.46 | 111.1  | 3.66  | 139    | 13.51 | 95.6   | 16.24  | <b>111.1</b>  |
| <b>74319_47</b> | 0.05086 | 0.00324 | 0.0051  | 0.0007  | 0.12211  | 0.00757 | 0.01741 | 0.0004  | 0.37061  | 105 | 234.6  | 140.38 | 111.3  | 2.56  | 117    | 6.85  | 102.9  | 14.14  | <b>111.3</b>  |
| <b>74319_48</b> | 0.05309 | 0.00186 | 0.01341 | 0.00159 | 0.32762  | 0.01146 | 0.04476 | 0.00078 | 0.498185 | 102 | 332.8  | 77.58  | 282.3  | 4.8   | 287.7  | 8.76  | 269.3  | 31.71  | <b>282.3</b>  |

|                 |         |         |         |         |          |         |         |         |          |     |        |        |        |       |        |       |        |        |               |
|-----------------|---------|---------|---------|---------|----------|---------|---------|---------|----------|-----|--------|--------|--------|-------|--------|-------|--------|--------|---------------|
| <b>74319_49</b> | 0.05354 | 0.00292 | 0.0114  | 0.0017  | 0.28596  | 0.01519 | 0.03875 | 0.00082 | 0.398373 | 104 | 351.6  | 117.99 | 245.1  | 5.08  | 255.4  | 11.99 | 229.1  | 33.89  | <b>245.1</b>  |
| <b>74319_50</b> | 0.05111 | 0.0034  | 0.00524 | 0.00079 | 0.11081  | 0.00718 | 0.01573 | 0.00037 | 0.363017 | 106 | 245.6  | 146.32 | 100.6  | 2.35  | 106.7  | 6.56  | 105.6  | 15.83  | <b>100.6</b>  |
| <b>74319_51</b> | 0.05685 | 0.00195 | 0.02287 | 0.00278 | 0.57576  | 0.01974 | 0.07347 | 0.00129 | 0.512123 | 101 | 484.9  | 74.74  | 457    | 7.78  | 461.7  | 12.72 | 457    | 54.92  | <b>457</b>    |
| <b>74319_52</b> | 0.28376 | 0.01652 | 0.06871 | 0.01704 | 11.35074 | 0.64137 | 0.29015 | 0.00703 | 0.01704  | 49  | 3383.7 | 87.95  | 1642.3 | 35.13 | 2552.4 | 52.73 | 1343.2 | 322.23 | <b>3383.7</b> |
| <b>74319_53</b> | 0.08169 | 0.0036  | 0.05911 | 0.01044 | 2.15084  | 0.09265 | 0.19098 | 0.00389 | 0.01044  | 91  | 1238.1 | 84     | 1126.7 | 21.07 | 1165.3 | 29.86 | 1160.8 | 199.14 | <b>1238.1</b> |
| <b>74319_54</b> | 0.06475 | 0.00273 | 0.03351 | 0.00587 | 0.97519  | 0.04037 | 0.10924 | 0.00214 | 0.00587  | 103 | 766.3  | 86.48  | 668.3  | 12.44 | 691.1  | 20.75 | 666.2  | 114.79 | <b>668.3</b>  |
| <b>74319_55</b> | 0.05952 | 0.00249 | 0.02986 | 0.0053  | 0.81329  | 0.03337 | 0.09912 | 0.00193 | 0.0053   | 99  | 586    | 88.19  | 609.2  | 11.3  | 604.3  | 18.69 | 594.7  | 104.03 | <b>609.2</b>  |
| <b>74319_56</b> | 0.04865 | 0.00354 | 0.00557 | 0.00109 | 0.11559  | 0.00813 | 0.01723 | 0.00044 | 0.00109  | 101 | 131.1  | 162.51 | 110.1  | 2.77  | 111.1  | 7.4   | 112.2  | 21.94  | <b>110.1</b>  |
| <b>74319_57</b> | 0.17444 | 0.00727 | 0.0833  | 0.01509 | 6.94145  | 0.28343 | 0.28864 | 0.00565 | 0.01509  | 63  | 2600.7 | 67.84  | 1634.7 | 28.28 | 2104   | 36.24 | 1617.2 | 281.48 | <b>2600.7</b> |
| <b>74319_58</b> | 0.08368 | 0.00529 | 0.05671 | 0.01369 | 2.26867  | 0.13811 | 0.19664 | 0.00513 | 0.01369  | 90  | 1285   | 118.51 | 1157.3 | 27.63 | 1202.6 | 42.9  | 1114.9 | 261.83 | <b>1285</b>   |
| <b>74319_59</b> | 0.05841 | 0.00277 | 0.02935 | 0.00551 | 0.78967  | 0.03647 | 0.09807 | 0.00203 | 0.00551  | 98  | 545.2  | 100.41 | 603.1  | 11.93 | 591    | 20.69 | 584.7  | 108.19 | <b>603.1</b>  |
| <b>74319_60</b> | 0.0506  | 0.00237 | 0.01261 | 0.00231 | 0.29666  | 0.01353 | 0.04252 | 0.00087 | 0.00231  | 98  | 222.7  | 104.64 | 268.5  | 5.38  | 263.8  | 10.59 | 253.2  | 46.05  | <b>268.5</b>  |
| <b>74319_61</b> | 0.03973 | 0.00363 | 0.00488 | 0.00096 | 0.0932   | 0.00831 | 0.01702 | 0.00046 | 0.00096  | 83  | 0.1    | 0      | 108.8  | 2.93  | 90.5   | 7.71  | 98.5   | 19.35  | <b>108.8</b>  |
| <b>74319_62</b> | 0.08839 | 0.00433 | 0.01107 | 0.00215 | 0.36216  | 0.01717 | 0.02972 | 0.00064 | 0.00215  | 166 | 1391.1 | 91.1   | 188.8  | 3.98  | 313.8  | 12.8  | 222.5  | 42.91  | <b>188.8</b>  |
| <b>74319_63</b> | 0.06131 | 0.00303 | 0.02831 | 0.00531 | 0.82536  | 0.03956 | 0.09764 | 0.00208 | 0.00531  | 102 | 650.2  | 102.59 | 600.6  | 12.2  | 611    | 22.01 | 564.2  | 104.3  | <b>600.6</b>  |
| <b>74319_64</b> | 0.07448 | 0.00334 | 0.04937 | 0.00916 | 1.83767  | 0.08031 | 0.17898 | 0.00361 | 0.00916  | 101 | 1054.1 | 88.09  | 1061.4 | 19.74 | 1059   | 28.74 | 974    | 176.38 | <b>1054.1</b> |
| <b>74319_65</b> | 0.05387 | 0.00339 | 0.01091 | 0.00238 | 0.26586  | 0.01626 | 0.0358  | 0.00085 | 0.388211 | 106 | 365.3  | 135.47 | 226.8  | 5.31  | 239.4  | 13.04 | 219.3  | 47.56  | <b>226.8</b>  |
| <b>74319_66</b> | 0.10083 | 0.00651 | 0.07804 | 0.02122 | 3.74695  | 0.23375 | 0.2696  | 0.00704 | 0.418581 | 94  | 1639.5 | 115.25 | 1538.8 | 35.74 | 1581.5 | 50    | 1518.8 | 397.8  | <b>1639.5</b> |
| <b>74319_67</b> | 0.10674 | 0.01184 | 0.01039 | 0.00374 | 0.38665  | 0.04029 | 0.02627 | 0.00116 | 0.423759 | 199 | 1744.4 | 190.43 | 167.2  | 7.27  | 331.9  | 29.5  | 208.9  | 74.77  | <b>167.2</b>  |
| <b>74319_68</b> | 0.04978 | 0.00422 | 0.00506 | 0.00114 | 0.1157   | 0.00957 | 0.01686 | 0.00045 | 0.322683 | 103 | 184.6  | 186.3  | 107.8  | 2.83  | 111.2  | 8.71  | 102    | 22.86  | <b>107.8</b>  |
| <b>74319_69</b> | 0.07686 | 0.00431 | 0.05667 | 0.01175 | 2.07179  | 0.11262 | 0.19553 | 0.00459 | 0.431847 | 103 | 1117.7 | 107.99 | 1151.3 | 24.76 | 1139.5 | 37.23 | 1114.2 | 224.83 | <b>1117.7</b> |
| <b>74319_70</b> | 0.08607 | 0.00435 | 0.06244 | 0.01396 | 2.14932  | 0.10557 | 0.18116 | 0.00395 | 0.44391  | 80  | 1339.7 | 94.59  | 1073.3 | 21.57 | 1164.8 | 34.04 | 1224.3 | 265.54 | <b>1339.7</b> |
| <b>74319_71</b> | 0.05389 | 0.00715 | 0.00374 | 0.0011  | 0.12329  | 0.01569 | 0.0166  | 0.00071 | 0.33609  | 111 | 366.5  | 274.41 | 106.1  | 4.51  | 118    | 14.18 | 75.5   | 22.18  | <b>106.1</b>  |
| <b>74319_72</b> | 0.05849 | 0.00331 | 0.01402 | 0.00322 | 0.36686  | 0.02007 | 0.0455  | 0.00104 | 0.417806 | 111 | 548.2  | 118.86 | 286.8  | 6.44  | 317.3  | 14.91 | 281.4  | 64.15  | <b>286.8</b>  |
| <b>74319_73</b> | 0.05009 | 0.00378 | 0.00555 | 0.00155 | 0.13077  | 0.00949 | 0.01894 | 0.00053 | 0.385601 | 103 | 199.3  | 166.19 | 120.9  | 3.35  | 124.8  | 8.52  | 111.9  | 31.16  | <b>120.9</b>  |
| <b>74319_74</b> | 0.05163 | 0.00536 | 0.00526 | 0.00135 | 0.11402  | 0.01149 | 0.01602 | 0.0005  | 0.309719 | 107 | 269.2  | 221.66 | 102.4  | 3.17  | 109.6  | 10.48 | 106    | 27.06  | <b>102.4</b>  |
| <b>74319_75</b> | 0.0687  | 0.00372 | 0.04082 | 0.00956 | 1.21157  | 0.06335 | 0.12793 | 0.00289 | 0.432043 | 104 | 889.7  | 107.94 | 776.1  | 16.51 | 805.9  | 29.08 | 808.6  | 185.75 | <b>776.1</b>  |
| <b>74319_76</b> | 0.09317 | 0.00831 | 0.00945 | 0.00272 | 0.33031  | 0.02801 | 0.02572 | 0.00087 | 0.398893 | 177 | 1491.3 | 160.11 | 163.7  | 5.47  | 289.8  | 21.38 | 190.2  | 54.55  | <b>163.7</b>  |
| <b>74319_77</b> | 0.09259 | 0.0055  | 0.07787 | 0.02037 | 3.21651  | 0.18373 | 0.252   | 0.00608 | 0.422384 | 98  | 1479.4 | 108.73 | 1448.8 | 31.29 | 1461.1 | 44.25 | 1515.7 | 381.96 | <b>1479.4</b> |
| <b>74319_78</b> | 0.05073 | 0.00336 | 0.0142  | 0.00386 | 0.31432  | 0.01998 | 0.04494 | 0.00113 | 0.395569 | 98  | 228.8  | 145.89 | 283.4  | 6.99  | 277.5  | 15.44 | 284.9  | 76.89  | <b>283.4</b>  |
| <b>74319_79</b> | 0.08655 | 0.01326 | 0.00475 | 0.00222 | 0.16703  | 0.02409 | 0.014   | 0.00078 | 0.3863   | 175 | 1350.5 | 270.12 | 89.6   | 4.99  | 156.8  | 20.96 | 95.8   | 44.75  | <b>89.6</b>   |
| <b>74319_80</b> | 0.05967 | 0.00352 | 0.02758 | 0.00686 | 0.72117  | 0.04091 | 0.08767 | 0.00207 | 0.416224 | 102 | 591.6  | 123.05 | 541.8  | 12.28 | 551.4  | 24.13 | 549.9  | 134.98 | <b>541.8</b>  |
| <b>74320_01</b> | 0.05702 | 0.00107 | 0.02036 | 0.00068 | 0.62934  | 0.01194 | 0.08006 | 0.00098 | 0.645196 | 100 | 491.8  | 40.86  | 496.5  | 5.88  | 495.7  | 7.44  | 407.3  | 13.38  | <b>496.5</b>  |

|                 |         |         |         |         |         |         |         |         |          |     |        |        |        |       |        |       |        |        |               |
|-----------------|---------|---------|---------|---------|---------|---------|---------|---------|----------|-----|--------|--------|--------|-------|--------|-------|--------|--------|---------------|
| <b>74320_02</b> | 0.24574 | 0.00387 | 0.12024 | 0.00401 | 4.08477 | 0.06357 | 0.12058 | 0.00158 | 0.841971 | 23  | 3157.5 | 24.76  | 733.9  | 9.11  | 1651.3 | 12.69 | 2294.9 | 72.44  | <b>733.9</b>  |
| <b>74320_03</b> | 0.07621 | 0.00398 | 0.00472 | 0.00021 | 0.16765 | 0.00858 | 0.01596 | 0.00026 | 0.318315 | 65  | 1100.5 | 101.13 | 102.1  | 1.67  | 157.4  | 7.46  | 95.2   | 4.23   | <b>102.1</b>  |
| <b>74320_04</b> | 0.14063 | 0.00192 | 0.05597 | 0.002   | 2.22586 | 0.03182 | 0.11481 | 0.00139 | 0.846901 | 59  | 2235   | 23.48  | 700.6  | 8.02  | 1189.2 | 10.02 | 1100.8 | 38.25  | <b>700.6</b>  |
| <b>74320_05</b> | 0.50418 | 0.00643 | 0.13279 | 0.00492 | 5.60762 | 0.07567 | 0.08068 | 0.00097 | 0.890965 | 26  | 4253.5 | 18.65  | 500.2  | 5.76  | 1917.3 | 11.63 | 2520.2 | 87.73  | <b>500.2</b>  |
| <b>74320_07</b> | 0.10712 | 0.00172 | 0.05728 | 0.00238 | 1.79691 | 0.02951 | 0.12168 | 0.00152 | 0.760644 | 71  | 1751   | 29.06  | 740.2  | 8.72  | 1044.3 | 10.71 | 1125.9 | 45.51  | <b>740.2</b>  |
| <b>74320_08</b> | 0.16567 | 0.00258 | 0.05283 | 0.00228 | 2.04829 | 0.03254 | 0.08968 | 0.00113 | 0.793153 | 49  | 2514.4 | 25.97  | 553.6  | 6.67  | 1131.7 | 10.84 | 1040.6 | 43.8   | <b>553.6</b>  |
| <b>74320_09</b> | 0.05652 | 0.00162 | 0.00766 | 0.00035 | 0.22632 | 0.00646 | 0.02905 | 0.00039 | 0.470337 | 89  | 472.1  | 62.46  | 184.6  | 2.42  | 207.2  | 5.35  | 154.2  | 7.1    | <b>184.6</b>  |
| <b>74320_10</b> | 0.06699 | 0.0012  | 0.02303 | 0.00109 | 0.795   | 0.01454 | 0.08608 | 0.00108 | 0.686    | 90  | 837.6  | 36.98  | 532.3  | 6.4   | 594    | 8.23  | 460.2  | 21.56  | <b>532.3</b>  |
| <b>74320_12</b> | 0.05579 | 0.00234 | 0.01074 | 0.0006  | 0.31011 | 0.01284 | 0.04032 | 0.00059 | 0.353413 | 93  | 443.8  | 90.39  | 254.8  | 3.68  | 274.3  | 9.95  | 216    | 11.93  | <b>254.8</b>  |
| <b>74320_13</b> | 0.13594 | 0.00421 | 0.06305 | 0.0067  | 6.87592 | 0.20742 | 0.36687 | 0.0058  | 0.524078 | 96  | 2176.1 | 52.9   | 2014.7 | 27.33 | 2095.6 | 26.74 | 1235.8 | 127.47 | <b>2176.1</b> |
| <b>74320_14</b> | 0.06058 | 0.00354 | 0.02419 | 0.00313 | 0.72897 | 0.04174 | 0.08727 | 0.00155 | 0.310187 | 97  | 624.5  | 121.07 | 539.4  | 9.16  | 556    | 24.51 | 483.1  | 61.87  | <b>539.4</b>  |
| <b>74320_15</b> | 0.06473 | 0.00272 | 0.02178 | 0.00293 | 0.81756 | 0.03319 | 0.09163 | 0.00171 | 0.459696 | 93  | 765.5  | 86.11  | 565.1  | 10.1  | 606.7  | 18.54 | 435.4  | 57.91  | <b>565.1</b>  |
| <b>74320_16</b> | 0.06759 | 0.00281 | 0.01797 | 0.0021  | 0.91474 | 0.03689 | 0.09819 | 0.0018  | 0.454563 | 92  | 855.9  | 84.08  | 603.8  | 10.56 | 659.6  | 19.56 | 360    | 41.7   | <b>603.8</b>  |
| <b>74320_17</b> | 0.06269 | 0.00261 | 0.02199 | 0.00277 | 0.94406 | 0.03829 | 0.10925 | 0.00206 | 0.4649   | 99  | 697.7  | 86.44  | 668.4  | 11.96 | 675    | 20    | 439.7  | 54.86  | <b>668.4</b>  |
| <b>74320_18</b> | 0.13252 | 0.00889 | 0.01452 | 0.00235 | 0.79824 | 0.05073 | 0.04369 | 0.00126 | 0.453792 | 46  | 2131.7 | 112.85 | 275.6  | 7.79  | 595.8  | 28.65 | 291.3  | 46.72  | <b>275.6</b>  |
| <b>74320_19</b> | 0.12609 | 0.0079  | 0.01676 | 0.00237 | 0.77202 | 0.04593 | 0.04442 | 0.00119 | 0.450299 | 48  | 2044.2 | 106.78 | 280.2  | 7.32  | 580.9  | 26.32 | 336    | 47.07  | <b>280.2</b>  |
| <b>74320_20</b> | 0.11764 | 0.01185 | 0.00638 | 0.00089 | 0.27128 | 0.02652 | 0.01673 | 0.00047 | 0.287373 | 44  | 1920.7 | 170.4  | 106.9  | 3     | 243.7  | 21.18 | 128.5  | 17.88  | <b>106.9</b>  |
| <b>74320_22</b> | 0.0607  | 0.00316 | 0.0208  | 0.00329 | 0.77806 | 0.03946 | 0.093   | 0.00192 | 0.407075 | 98  | 628.6  | 108.39 | 573.2  | 11.33 | 584.4  | 22.54 | 416.2  | 65.14  | <b>573.2</b>  |
| <b>74320_23</b> | 0.05362 | 0.00225 | 0.01008 | 0.00131 | 0.31397 | 0.01295 | 0.04247 | 0.00069 | 0.393899 | 97  | 355.1  | 91.81  | 268.2  | 4.26  | 277.3  | 10.01 | 202.7  | 26.22  | <b>268.2</b>  |
| <b>74320_24</b> | 0.07442 | 0.00628 | 0.00461 | 0.00063 | 0.1701  | 0.01411 | 0.01658 | 0.00036 | 0.261755 | 66  | 1053   | 161.35 | 106    | 2.26  | 159.5  | 12.24 | 92.9   | 12.58  | <b>106</b>    |
| <b>74320_25</b> | 0.06466 | 0.00312 | 0.01934 | 0.00323 | 0.67347 | 0.03167 | 0.07554 | 0.00141 | 0.396929 | 90  | 763.3  | 98.68  | 469.5  | 8.46  | 522.8  | 19.22 | 387.1  | 63.96  | <b>469.5</b>  |
| <b>74320_26</b> | 0.06228 | 0.0039  | 0.0082  | 0.00134 | 0.2807  | 0.01718 | 0.03269 | 0.00064 | 0.319878 | 83  | 683.6  | 128.25 | 207.4  | 4     | 251.2  | 13.62 | 165    | 26.82  | <b>207.4</b>  |
| <b>74320_27</b> | 0.09019 | 0.00426 | 0.04971 | 0.00873 | 2.31236 | 0.10608 | 0.18596 | 0.00367 | 0.430198 | 90  | 1429.5 | 87.71  | 1099.5 | 19.94 | 1216.1 | 32.52 | 980.6  | 168.05 | <b>1429.5</b> |
| <b>74320_28</b> | 0.06261 | 0.00416 | 0.00519 | 0.00083 | 0.20035 | 0.01301 | 0.02321 | 0.00048 | 0.318477 | 80  | 694.9  | 135.71 | 147.9  | 3.01  | 185.4  | 11.01 | 104.7  | 16.6   | <b>147.9</b>  |
| <b>74320_29</b> | 0.06448 | 0.00473 | 0.01188 | 0.00242 | 0.50365 | 0.0352  | 0.05667 | 0.00157 | 0.396399 | 86  | 757.3  | 147.46 | 355.3  | 9.57  | 414.2  | 23.77 | 238.6  | 48.4   | <b>355.3</b>  |
| <b>74320_30</b> | 0.1927  | 0.01287 | 0.00965 | 0.00165 | 0.73258 | 0.04569 | 0.02758 | 0.00079 | 0.459269 | 31  | 2765.3 | 105.58 | 175.4  | 4.94  | 558.1  | 26.78 | 194.2  | 33.11  | <b>175.4</b>  |
| <b>74320_31</b> | 0.06644 | 0.005   | 0.01057 | 0.00231 | 0.34621 | 0.02491 | 0.0378  | 0.00105 | 0.386068 | 79  | 820.1  | 149.77 | 239.2  | 6.49  | 301.9  | 18.79 | 212.5  | 46.27  | <b>239.2</b>  |
| <b>74320_32</b> | 0.09437 | 0.0049  | 0.02109 | 0.0035  | 0.61809 | 0.03085 | 0.0475  | 0.00099 | 0.417579 | 61  | 1515.6 | 94.88  | 299.2  | 6.12  | 488.7  | 19.36 | 421.9  | 69.28  | <b>299.2</b>  |
| <b>74320_33</b> | 0.05251 | 0.00262 | 0.00878 | 0.00143 | 0.34951 | 0.01681 | 0.04828 | 0.00096 | 0.413424 | 100 | 307.5  | 109.58 | 304    | 5.92  | 304.4  | 12.65 | 176.6  | 28.7   | <b>304</b>    |
| <b>74320_34</b> | 0.05809 | 0.00532 | 0.0111  | 0.00283 | 0.55148 | 0.04795 | 0.06885 | 0.00225 | 0.375854 | 96  | 532.5  | 189.39 | 429.2  | 13.57 | 446    | 31.38 | 223.2  | 56.49  | <b>429.2</b>  |
| <b>74320_35</b> | 0.07996 | 0.00558 | 0.02379 | 0.00447 | 2.0628  | 0.13665 | 0.18702 | 0.00494 | 0.398737 | 97  | 1196.1 | 131.62 | 1105.2 | 26.82 | 1136.5 | 45.3  | 475.3  | 88.2   | <b>1196.1</b> |
| <b>74320_36</b> | 0.05002 | 0.00511 | 0.00401 | 0.00104 | 0.11787 | 0.01165 | 0.01709 | 0.00052 | 0.30785  | 97  | 195.8  | 221.36 | 109.3  | 3.32  | 113.1  | 10.58 | 80.9   | 21.01  | <b>109.3</b>  |
| <b>74320_37</b> | 0.06044 | 0.00276 | 0.02488 | 0.00482 | 0.80457 | 0.03563 | 0.09658 | 0.00178 | 0.41618  | 99  | 619.4  | 95.61  | 594.3  | 10.48 | 599.4  | 20.05 | 496.7  | 95.01  | <b>594.3</b>  |



|                 |         |         |         |         |         |         |         |         |          |     |        |        |        |       |        |       |        |        |               |
|-----------------|---------|---------|---------|---------|---------|---------|---------|---------|----------|-----|--------|--------|--------|-------|--------|-------|--------|--------|---------------|
| <b>74320_38</b> | 0.05977 | 0.004   | 0.00935 | 0.00205 | 0.39249 | 0.02538 | 0.04766 | 0.00121 | 0.392616 | 89  | 594.8  | 139.12 | 300.1  | 7.45  | 336.2  | 18.5  | 188.1  | 41     | <b>300.1</b>  |
| <b>74320_39</b> | 0.08124 | 0.00452 | 0.03352 | 0.00677 | 1.78833 | 0.09633 | 0.15976 | 0.00352 | 0.409035 | 92  | 1227.3 | 105.44 | 955.4  | 19.58 | 1041.2 | 35.08 | 666.4  | 132.39 | <b>955.4</b>  |
| <b>74320_40</b> | 0.05906 | 0.00272 | 0.01859 | 0.00355 | 0.67179 | 0.02999 | 0.08252 | 0.00153 | 0.415326 | 98  | 569.4  | 97.15  | 511.1  | 9.13  | 521.8  | 18.21 | 372.4  | 70.38  | <b>511.1</b>  |
| <b>74320_41</b> | 0.10755 | 0.00716 | 0.04048 | 0.00849 | 2.82982 | 0.18133 | 0.19091 | 0.00495 | 0.404637 | 83  | 1758.3 | 117.06 | 1126.3 | 26.8  | 1363.5 | 48.08 | 802    | 164.88 | <b>1126.3</b> |
| <b>74320_42</b> | 0.39109 | 0.02003 | 0.02391 | 0.00448 | 1.39377 | 0.06681 | 0.02585 | 0.00061 | 0.492288 | 19  | 3875.2 | 75.08  | 164.5  | 3.81  | 886.3  | 28.34 | 477.6  | 88.51  | <b>164.5</b>  |
| <b>74320_43</b> | 0.11314 | 0.00641 | 0.05047 | 0.01076 | 2.95543 | 0.16118 | 0.18954 | 0.00427 | 0.413082 | 80  | 1850.4 | 99.14  | 1118.9 | 23.13 | 1396.2 | 41.38 | 995.2  | 207    | <b>1118.9</b> |
| <b>74320_44</b> | 0.06605 | 0.00537 | 0.01613 | 0.0038  | 1.02934 | 0.07983 | 0.11305 | 0.0034  | 0.387794 | 96  | 807.9  | 161.38 | 690.4  | 19.69 | 718.6  | 39.94 | 323.4  | 75.52  | <b>690.4</b>  |
| <b>74320_45</b> | 0.06703 | 0.00585 | 0.00456 | 0.00103 | 0.15567 | 0.01311 | 0.01685 | 0.00048 | 0.338254 | 73  | 838.6  | 172.05 | 107.7  | 3.07  | 146.9  | 11.52 | 91.9   | 20.8   | <b>107.7</b>  |
| <b>74320_46</b> | 0.06193 | 0.00459 | 0.00449 | 0.00104 | 0.16404 | 0.01169 | 0.01922 | 0.0005  | 0.36505  | 80  | 671.8  | 150.99 | 122.7  | 3.15  | 154.2  | 10.2  | 90.5   | 20.84  | <b>122.7</b>  |
| <b>74320_47</b> | 0.12777 | 0.01637 | 0.04255 | 0.01196 | 1.76536 | 0.21702 | 0.10026 | 0.0041  | 0.332652 | 60  | 2067.5 | 209.97 | 615.9  | 24.01 | 1032.8 | 79.68 | 842.2  | 231.88 | <b>615.9</b>  |
| <b>74320_48</b> | 0.08523 | 0.00652 | 0.00728 | 0.00176 | 0.2916  | 0.02131 | 0.02483 | 0.00069 | 0.380256 | 61  | 1320.6 | 141.35 | 158.1  | 4.34  | 259.8  | 16.75 | 146.5  | 35.35  | <b>158.1</b>  |
| <b>74320_49</b> | 0.07067 | 0.00491 | 0.04188 | 0.01206 | 1.66396 | 0.11053 | 0.17082 | 0.00444 | 0.391297 | 102 | 947.9  | 136.19 | 1016.6 | 24.42 | 994.9  | 42.13 | 829.3  | 233.95 | <b>947.9</b>  |
| <b>74320_50</b> | 0.08695 | 0.00481 | 0.06111 | 0.0137  | 2.26473 | 0.12047 | 0.18896 | 0.00406 | 0.403918 | 93  | 1359.5 | 102.99 | 1115.7 | 21.99 | 1201.4 | 37.47 | 1198.9 | 260.92 | <b>1359.5</b> |
| <b>74320_51</b> | 0.06548 | 0.00452 | 0.0502  | 0.01592 | 0.85525 | 0.05679 | 0.09474 | 0.00228 | 0.362429 | 93  | 789.9  | 138.54 | 583.5  | 13.41 | 627.5  | 31.08 | 990.1  | 306.38 | <b>583.5</b>  |
| <b>74320_52</b> | 0.07502 | 0.00565 | 0.0453  | 0.01442 | 1.72962 | 0.12377 | 0.16723 | 0.00463 | 0.386903 | 98  | 1069.2 | 144.39 | 996.9  | 25.59 | 1019.6 | 46.04 | 895.4  | 278.75 | <b>996.9</b>  |
| <b>74320_53</b> | 0.10035 | 0.01078 | 0.06928 | 0.03371 | 2.82591 | 0.28943 | 0.20429 | 0.00777 | 0.371355 | 88  | 1630.5 | 187.44 | 1198.3 | 41.59 | 1362.4 | 76.81 | 1353.9 | 637.15 | <b>1630.5</b> |
| <b>74320_54</b> | 0.04952 | 0.00144 | 0.00315 | 0.0001  | 0.19263 | 0.00572 | 0.02821 | 0.00052 | 0.620766 | 100 | 172.6  | 66.47  | 179.4  | 3.24  | 178.9  | 4.87  | 63.5   | 2.05   | <b>179.4</b>  |
| <b>74320_55</b> | 0.07121 | 0.00133 | 0.01764 | 0.0005  | 0.73897 | 0.0154  | 0.07527 | 0.00122 | 0.777757 | 83  | 963.3  | 37.78  | 467.8  | 7.33  | 561.8  | 8.99  | 353.4  | 9.85   | <b>467.8</b>  |
| <b>74320_56</b> | 0.07869 | 0.00111 | 0.04331 | 0.00103 | 2.06539 | 0.03498 | 0.19036 | 0.00284 | 0.880897 | 96  | 1164.4 | 27.79  | 1123.3 | 15.37 | 1137.4 | 11.59 | 856.9  | 19.97  | <b>1164.4</b> |
| <b>74320_57</b> | 0.09036 | 0.00266 | 0.005   | 0.00016 | 0.25193 | 0.0074  | 0.02022 | 0.00038 | 0.639809 | 57  | 1432.9 | 55.31  | 129.1  | 2.42  | 228.1  | 6     | 100.8  | 3.19   | <b>129.1</b>  |
| <b>74320_58</b> | 0.05296 | 0.00124 | 0.00995 | 0.00031 | 0.31288 | 0.00777 | 0.04284 | 0.0007  | 0.657969 | 98  | 327.2  | 52.2   | 270.4  | 4.35  | 276.4  | 6.01  | 200    | 6.13   | <b>270.4</b>  |
| <b>74320_59</b> | 0.05762 | 0.0026  | 0.00504 | 0.00036 | 0.12683 | 0.00559 | 0.01596 | 0.00035 | 0.49756  | 84  | 515    | 96.37  | 102.1  | 2.22  | 121.2  | 5.03  | 101.6  | 7.18   | <b>102.1</b>  |
| <b>74320_60</b> | 0.05166 | 0.00114 | 0.01039 | 0.00033 | 0.31296 | 0.00737 | 0.04394 | 0.0007  | 0.676487 | 100 | 270.3  | 49.69  | 277.2  | 4.32  | 276.5  | 5.7   | 209    | 6.57   | <b>277.2</b>  |
| <b>74320_61</b> | 0.04759 | 0.00132 | 0.00351 | 0.00012 | 0.10427 | 0.00299 | 0.01589 | 0.00027 | 0.592554 | 101 | 78.3   | 65.33  | 101.6  | 1.71  | 100.7  | 2.74  | 70.9   | 2.39   | <b>101.6</b>  |
| <b>74320_62</b> | 0.0601  | 0.00179 | 0.01528 | 0.00083 | 0.38422 | 0.01152 | 0.04638 | 0.00078 | 0.560908 | 89  | 607.3  | 63.07  | 292.2  | 4.8   | 330.1  | 8.45  | 306.4  | 16.62  | <b>292.2</b>  |
| <b>74320_63</b> | 0.07977 | 0.00103 | 0.04751 | 0.00144 | 2.13524 | 0.03531 | 0.19415 | 0.00294 | 0.915712 | 96  | 1191.3 | 25.26  | 1143.8 | 15.88 | 1160.3 | 11.43 | 938.2  | 27.74  | <b>1191.3</b> |
| <b>74320_64</b> | 0.06651 | 0.00107 | 0.02868 | 0.00085 | 1.2761  | 0.02403 | 0.13917 | 0.00217 | 0.828028 | 101 | 822.4  | 33.28  | 840    | 12.3  | 835.1  | 10.72 | 571.6  | 16.77  | <b>840</b>    |
| <b>74320_65</b> | 0.06465 | 0.00087 | 0.03518 | 0.00112 | 0.82394 | 0.01398 | 0.09244 | 0.00142 | 0.905351 | 93  | 763    | 28.13  | 570    | 8.36  | 610.2  | 7.78  | 698.8  | 21.87  | <b>570</b>    |
| <b>74320_67</b> | 0.10359 | 0.00261 | 0.06255 | 0.00465 | 4.15625 | 0.10975 | 0.29101 | 0.00508 | 0.661078 | 97  | 1689.4 | 45.76  | 1646.6 | 25.39 | 1665.4 | 21.61 | 1226.2 | 88.52  | <b>1689.4</b> |
| <b>74320_68</b> | 0.07384 | 0.00247 | 0.02577 | 0.0023  | 1.64787 | 0.05542 | 0.16188 | 0.00317 | 0.582267 | 98  | 1037.1 | 66.11  | 967.2  | 17.58 | 988.7  | 21.25 | 514.3  | 45.26  | <b>1037.1</b> |
| <b>74320_69</b> | 0.14019 | 0.00397 | 0.05218 | 0.00443 | 6.90949 | 0.202   | 0.35749 | 0.00653 | 0.624804 | 88  | 2229.5 | 48.24  | 1970.3 | 31    | 2099.9 | 25.93 | 1028.1 | 85.02  | <b>2229.5</b> |
| <b>74320_70</b> | 0.13795 | 0.01325 | 0.0263  | 0.00511 | 6.72413 | 0.6078  | 0.3542  | 0.01522 | 0.475381 | 89  | 2201.7 | 157.87 | 1954.6 | 72.46 | 2075.8 | 79.9  | 524.7  | 100.64 | <b>2201.7</b> |
| <b>74320_71</b> | 0.05293 | 0.00168 | 0.00821 | 0.00066 | 0.27526 | 0.00888 | 0.03772 | 0.00069 | 0.567032 | 97  | 325.6  | 70.56  | 238.7  | 4.28  | 246.9  | 7.07  | 165.3  | 13.15  | <b>238.7</b>  |

|                 |         |         |         |         |          |         |         |         |          |     |        |        |        |       |        |       |        |        |               |
|-----------------|---------|---------|---------|---------|----------|---------|---------|---------|----------|-----|--------|--------|--------|-------|--------|-------|--------|--------|---------------|
| <b>74320_72</b> | 0.05753 | 0.00188 | 0.01791 | 0.00143 | 0.65155  | 0.02148 | 0.08214 | 0.00153 | 0.565002 | 100 | 511.5  | 70.44  | 508.9  | 9.09  | 509.4  | 13.21 | 358.8  | 28.41  | <b>508.9</b>  |
| <b>74320_73</b> | 0.10598 | 0.00419 | 0.04295 | 0.00461 | 4.61961  | 0.18112 | 0.31617 | 0.00675 | 0.54453  | 102 | 1731.4 | 70.84  | 1771   | 33.07 | 1752.8 | 32.73 | 850    | 89.34  | <b>1731.4</b> |
| <b>74320_74</b> | 0.08804 | 0.00546 | 0.0219  | 0.00327 | 3.15273  | 0.18848 | 0.25983 | 0.0075  | 0.482829 | 108 | 1383.3 | 114.62 | 1489   | 38.36 | 1445.7 | 46.08 | 437.9  | 64.67  | <b>1383.3</b> |
| <b>74320_75</b> | 0.10947 | 0.0115  | 0.00287 | 0.00063 | 0.2043   | 0.02002 | 0.01355 | 0.0006  | 0.451873 | 46  | 1790.6 | 180.07 | 86.8   | 3.83  | 188.8  | 16.88 | 57.8   | 12.62  | <b>1790.6</b> |
| <b>74320_76</b> | 0.06017 | 0.00405 | 0.00596 | 0.00093 | 0.28028  | 0.0181  | 0.03378 | 0.00094 | 0.430905 | 85  | 609.8  | 139.04 | 214.2  | 5.89  | 250.9  | 14.35 | 120.1  | 18.75  | <b>214.2</b>  |
| <b>74320_77</b> | 0.05127 | 0.00193 | 0.00384 | 0.00043 | 0.1258   | 0.0047  | 0.0178  | 0.00035 | 0.526297 | 95  | 252.8  | 84.43  | 113.7  | 2.2   | 120.3  | 4.24  | 77.5   | 8.74   | <b>113.7</b>  |
| <b>74320_78</b> | 0.05669 | 0.00218 | 0.01515 | 0.00179 | 0.63961  | 0.02439 | 0.08185 | 0.00165 | 0.528651 | 101 | 478.6  | 83.55  | 507.1  | 9.83  | 502.1  | 15.1  | 303.9  | 35.73  | <b>507.1</b>  |
| <b>74320_79</b> | 0.11942 | 0.01058 | 0.02033 | 0.00373 | 3.28122  | 0.27201 | 0.19942 | 0.0075  | 0.453673 | 60  | 1947.6 | 150.41 | 1172.2 | 40.33 | 1476.6 | 64.51 | 406.9  | 73.86  | <b>1947.6</b> |
| <b>74320_80</b> | 0.05326 | 0.00395 | 0.00707 | 0.00119 | 0.53761  | 0.03789 | 0.07322 | 0.00227 | 0.439885 | 104 | 340    | 159.12 | 455.5  | 13.61 | 436.8  | 25.02 | 142.5  | 23.96  | <b>455.5</b>  |
| <b>74320_81</b> | 0.06149 | 0.0023  | 0.01775 | 0.00208 | 0.68164  | 0.02544 | 0.08041 | 0.00159 | 0.529816 | 94  | 656.3  | 78.37  | 498.6  | 9.5   | 527.8  | 15.36 | 355.6  | 41.31  | <b>498.6</b>  |
| <b>74320_82</b> | 0.05166 | 0.00376 | 0.00461 | 0.00076 | 0.29991  | 0.02077 | 0.04212 | 0.00129 | 0.442238 | 100 | 270.3  | 158.61 | 266    | 7.96  | 266.3  | 16.22 | 92.9   | 15.28  | <b>266</b>    |
| <b>74321_01</b> | 0.05858 | 0.00292 | 0.00472 | 0.00028 | 0.12188  | 0.00587 | 0.0151  | 0.00029 | 0.398763 | 121 | 552    | 105.28 | 96.6   | 1.83  | 116.8  | 5.31  | 95.3   | 5.56   | <b>96.6</b>   |
| <b>74321_02</b> | 0.07774 | 0.00149 | 0.04064 | 0.00215 | 1.43324  | 0.02865 | 0.13381 | 0.00187 | 0.699113 | 112 | 1140   | 37.57  | 809.6  | 10.62 | 902.9  | 11.96 | 805.1  | 41.83  | <b>809.6</b>  |
| <b>74321_03</b> | 0.05999 | 0.00172 | 0.02563 | 0.0013  | 0.72274  | 0.02045 | 0.08742 | 0.00131 | 0.529602 | 102 | 603    | 60.78  | 540.3  | 7.78  | 552.3  | 12.06 | 511.6  | 25.68  | <b>540.3</b>  |
| <b>74321_04</b> | 0.15299 | 0.00239 | 0.09794 | 0.00476 | 7.78262  | 0.12923 | 0.36908 | 0.00476 | 0.776692 | 85  | 2380   | 26.34  | 2025.1 | 22.41 | 2206.2 | 14.94 | 1888.5 | 87.54  | <b>2379.6</b> |
| <b>74321_05</b> | 0.06777 | 0.00188 | 0.01885 | 0.00127 | 0.55757  | 0.01546 | 0.0597  | 0.00094 | 0.567863 | 120 | 862    | 56.64  | 373.8  | 5.69  | 449.9  | 10.08 | 377.5  | 25.19  | <b>373.8</b>  |
| <b>74321_06</b> | 0.2485  | 0.00545 | 0.11906 | 0.00902 | 15.29997 | 0.34189 | 0.44679 | 0.00679 | 0.680096 | 75  | 3175   | 34.32  | 2381   | 30.26 | 2834.1 | 21.3  | 2273.6 | 162.86 | <b>3175.2</b> |
| <b>74321_07</b> | 0.0906  | 0.00331 | 0.05225 | 0.00434 | 2.38408  | 0.08508 | 0.1909  | 0.00368 | 0.540176 | 78  | 1438   | 68.14  | 1126.2 | 19.91 | 1237.8 | 25.53 | 1029.4 | 83.35  | <b>1438.2</b> |
| <b>74321_08</b> | 0.05348 | 0.00416 | 0.00497 | 0.00036 | 0.1249   | 0.00947 | 0.01694 | 0.00039 | 0.303643 | 110 | 349    | 166.85 | 108.3  | 2.46  | 119.5  | 8.55  | 100.2  | 7.16   | <b>108.3</b>  |
| <b>74321_09</b> | 0.07126 | 0.0024  | 0.01776 | 0.00113 | 0.43516  | 0.01439 | 0.0443  | 0.00071 | 0.484666 | 131 | 965    | 67.4   | 279.4  | 4.36  | 366.8  | 10.18 | 355.8  | 22.52  | <b>279.4</b>  |
| <b>74321_10</b> | 0.05484 | 0.00235 | 0.01157 | 0.00076 | 0.28845  | 0.01201 | 0.03815 | 0.00068 | 0.428097 | 107 | 406    | 92.66  | 241.4  | 4.22  | 257.3  | 9.46  | 232.5  | 15.2   | <b>241.4</b>  |
| <b>74321_11</b> | 0.07184 | 0.00138 | 0.03155 | 0.00196 | 1.31335  | 0.02618 | 0.13261 | 0.00179 | 0.677154 | 106 | 981    | 38.67  | 802.7  | 10.19 | 851.6  | 11.49 | 627.9  | 38.34  | <b>802.7</b>  |
| <b>74321_12</b> | 0.07766 | 0.00322 | 0.05076 | 0.00505 | 2.01109  | 0.08152 | 0.18786 | 0.00372 | 0.488513 | 98  | 1138   | 80.34  | 1109.8 | 20.17 | 1119.3 | 27.49 | 1000.8 | 97.12  | <b>1138.1</b> |
| <b>74321_13</b> | 0.06286 | 0.00208 | 0.02787 | 0.00321 | 0.83104  | 0.02699 | 0.09592 | 0.00158 | 0.507186 | 104 | 703    | 68.83  | 590.5  | 9.27  | 614.2  | 14.97 | 555.7  | 63.12  | <b>590.5</b>  |
| <b>74321_14</b> | 0.05875 | 0.00197 | 0.02546 | 0.00286 | 0.68665  | 0.02256 | 0.08479 | 0.00137 | 0.491782 | 101 | 558    | 71.6   | 524.6  | 8.11  | 530.8  | 13.58 | 508.2  | 56.28  | <b>524.6</b>  |
| <b>74321_15</b> | 0.11921 | 0.00322 | 0.09625 | 0.01072 | 5.77918  | 0.15463 | 0.35167 | 0.00517 | 0.549449 | 100 | 1944   | 47.59  | 1942.6 | 24.65 | 1943.3 | 23.16 | 1857.5 | 197.65 | <b>1944.4</b> |
| <b>74321_16</b> | 0.05305 | 0.00187 | 0.01177 | 0.00134 | 0.27818  | 0.00959 | 0.03804 | 0.00061 | 0.465154 | 104 | 331    | 78.1   | 240.7  | 3.82  | 249.2  | 7.62  | 236.5  | 26.77  | <b>240.7</b>  |
| <b>74321_17</b> | 0.07302 | 0.00556 | 0.00802 | 0.00133 | 0.25954  | 0.01892 | 0.02579 | 0.00073 | 0.388289 | 143 | 1014   | 147.18 | 164.1  | 4.57  | 234.3  | 15.25 | 161.5  | 26.74  | <b>164.1</b>  |
| <b>74321_18</b> | 0.0618  | 0.002   | 0.02804 | 0.0033  | 0.83227  | 0.02632 | 0.09769 | 0.00155 | 0.501718 | 102 | 667    | 67.65  | 600.9  | 9.1   | 614.9  | 14.59 | 559    | 64.82  | <b>600.9</b>  |
| <b>74321_19</b> | 0.13372 | 0.00551 | 0.08816 | 0.01485 | 4.99188  | 0.19762 | 0.27077 | 0.00487 | 0.45432  | 72  | 2147   | 70.26  | 1544.7 | 24.72 | 1817.9 | 33.49 | 1707.8 | 275.84 | <b>2147.4</b> |
| <b>74321_20</b> | 0.06172 | 0.00316 | 0.02551 | 0.00309 | 0.74331  | 0.03682 | 0.08737 | 0.00173 | 0.399733 | 105 | 664    | 105.94 | 539.9  | 10.27 | 564.3  | 21.45 | 509.2  | 60.81  | <b>539.9</b>  |
| <b>74321_21</b> | 0.07161 | 0.00316 | 0.02883 | 0.0039  | 0.83667  | 0.03566 | 0.08477 | 0.00162 | 0.448379 | 118 | 975    | 87.4   | 524.5  | 9.65  | 617.3  | 19.71 | 574.5  | 76.67  | <b>524.5</b>  |
| <b>74321_22</b> | 0.05073 | 0.0019  | 0.01254 | 0.00175 | 0.30371  | 0.01102 | 0.04343 | 0.00072 | 0.456899 | 98  | 229    | 84.13  | 274    | 4.47  | 269.3  | 8.58  | 251.9  | 34.88  | <b>274</b>    |

|          |         |         |         |         |          |         |         |         |          |     |      |        |        |       |        |       |        |        |        |
|----------|---------|---------|---------|---------|----------|---------|---------|---------|----------|-----|------|--------|--------|-------|--------|-------|--------|--------|--------|
| 74321_23 | 0.05254 | 0.00208 | 0.00966 | 0.00132 | 0.22095  | 0.0085  | 0.03051 | 0.00052 | 0.443033 | 105 | 309  | 87.79  | 193.7  | 3.26  | 202.7  | 7.07  | 194.4  | 26.38  | 193.7  |
| 74321_24 | 0.0952  | 0.00297 | 0.07925 | 0.01023 | 3.65434  | 0.11188 | 0.27845 | 0.00438 | 0.513787 | 103 | 1532 | 57.58  | 1583.5 | 22.1  | 1561.5 | 24.41 | 1541.4 | 191.54 | 1532.1 |
| 74321_25 | 0.05527 | 0.00268 | 0.01358 | 0.00248 | 0.32502  | 0.01513 | 0.04265 | 0.00084 | 0.423089 | 106 | 423  | 104.69 | 269.3  | 5.2   | 285.8  | 11.59 | 272.7  | 49.47  | 269.3  |
| 74321_26 | 0.18762 | 0.01039 | 0.12348 | 0.02874 | 11.63598 | 0.6135  | 0.44983 | 0.00994 | 0.419108 | 88  | 2721 | 88.46  | 2394.5 | 44.18 | 2575.6 | 49.3  | 2353.4 | 517.04 | 2721.4 |
| 74321_27 | 0.17265 | 0.00765 | 0.08628 | 0.01604 | 7.39922  | 0.31441 | 0.31086 | 0.00593 | 0.448931 | 68  | 2584 | 72.13  | 1744.9 | 29.15 | 2160.9 | 38.01 | 1672.8 | 298.46 | 2583.5 |
| 74321_28 | 0.05264 | 0.00305 | 0.02151 | 0.00504 | 0.33189  | 0.01833 | 0.04574 | 0.00105 | 0.415647 | 101 | 313  | 126.32 | 288.3  | 6.47  | 291    | 13.98 | 430.2  | 99.71  | 288.3  |
| 74321_29 | 0.11227 | 0.00726 | 0.07176 | 0.0194  | 4.02208  | 0.24742 | 0.25994 | 0.00637 | 0.398366 | 81  | 1837 | 112.71 | 1489.6 | 32.59 | 1638.7 | 50.02 | 1400.7 | 365.86 | 1836.5 |
| 74321_30 | 0.05779 | 0.00337 | 0.02498 | 0.00569 | 0.71391  | 0.03983 | 0.08962 | 0.00201 | 0.401998 | 99  | 522  | 123.43 | 553.3  | 11.91 | 547.1  | 23.6  | 498.7  | 112.17 | 553.3  |
| 74321_31 | 0.09568 | 0.01001 | 0.07724 | 0.02956 | 3.54561  | 0.35164 | 0.26888 | 0.01062 | 0.398253 | 100 | 1542 | 184.79 | 1535.1 | 53.94 | 1537.5 | 78.55 | 1503.8 | 554.55 | 1541.5 |
| 74321_32 | 0.12385 | 0.00571 | 0.08486 | 0.01609 | 5.71988  | 0.25377 | 0.33499 | 0.00654 | 0.44004  | 93  | 2012 | 79.56  | 1862.5 | 31.58 | 1934.4 | 38.35 | 1646.4 | 299.74 | 2012.4 |
| 74321_33 | 0.05777 | 0.0036  | 0.02197 | 0.00471 | 0.61574  | 0.03686 | 0.07731 | 0.00181 | 0.391097 | 102 | 521  | 131.55 | 480    | 10.83 | 487.2  | 23.17 | 439.3  | 93.12  | 480    |
| 74321_34 | 0.05565 | 0.00374 | 0.02526 | 0.00629 | 0.69661  | 0.04495 | 0.09081 | 0.00225 | 0.38398  | 96  | 438  | 143.42 | 560.3  | 13.33 | 536.8  | 26.9  | 504.2  | 124.04 | 560.3  |
| 74321_35 | 0.07761 | 0.00387 | 0.05504 | 0.01128 | 2.10689  | 0.10115 | 0.19691 | 0.00405 | 0.428414 | 102 | 1137 | 96.08  | 1158.7 | 21.79 | 1151.1 | 33.06 | 1082.9 | 216.16 | 1137   |
| 74321_36 | 0.0707  | 0.00502 | 0.00544 | 0.00139 | 0.17837  | 0.0121  | 0.0183  | 0.0005  | 0.402768 | 143 | 949  | 138.9  | 116.9  | 3.15  | 166.7  | 10.42 | 109.7  | 27.95  | 116.9  |
| 74321_37 | 0.0615  | 0.0043  | 0.01473 | 0.00434 | 0.44227  | 0.02954 | 0.05217 | 0.00136 | 0.390297 | 113 | 657  | 143.17 | 327.8  | 8.31  | 371.8  | 20.8  | 295.6  | 86.49  | 327.8  |
| 74321_38 | 0.05812 | 0.00417 | 0.02533 | 0.00763 | 0.70644  | 0.04846 | 0.08817 | 0.00234 | 0.386889 | 100 | 534  | 150.37 | 544.7  | 13.87 | 542.6  | 28.84 | 505.6  | 150.4  | 544.7  |
| 74321_39 | 0.25233 | 0.01979 | 0.13087 | 0.04216 | 20.40977 | 1.52861 | 0.58673 | 0.01703 | 0.387541 | 93  | 3200 | 118.85 | 2976.1 | 69.17 | 3111   | 72.5  | 2485.8 | 753.6  | 3199.5 |
| 74321_40 | 0.06115 | 0.00523 | 0.025   | 0.00901 | 0.69385  | 0.05663 | 0.08231 | 0.00254 | 0.378094 | 105 | 645  | 173.95 | 509.9  | 15.15 | 535.1  | 33.94 | 499.1  | 177.71 | 509.9  |
| 74321_41 | 0.08224 | 0.00607 | 0.05409 | 0.01738 | 2.0839   | 0.14662 | 0.1838  | 0.00498 | 0.385095 | 87  | 1251 | 137.91 | 1087.7 | 27.09 | 1143.5 | 48.27 | 1064.7 | 333.2  | 1251.2 |
| 74321_42 | 0.07091 | 0.00526 | 0.04498 | 0.01459 | 1.50489  | 0.10635 | 0.15394 | 0.00418 | 0.384231 | 101 | 955  | 144.67 | 923    | 23.36 | 932.4  | 43.11 | 889.2  | 282.2  | 923    |
| 74321_43 | 0.0678  | 0.00558 | 0.0265  | 0.00864 | 0.87482  | 0.06856 | 0.0936  | 0.0028  | 0.381707 | 111 | 862  | 162.03 | 576.8  | 16.53 | 638.2  | 37.13 | 528.7  | 170.06 | 576.8  |
| 74321_44 | 0.05331 | 0.00995 | 0.01342 | 0.00938 | 0.31479  | 0.05587 | 0.04284 | 0.00268 | 0.352474 | 103 | 342  | 374.88 | 270.4  | 16.58 | 277.9  | 43.15 | 269.3  | 187.03 | 270.4  |
| 74321_45 | 0.05764 | 0.00603 | 0.00653 | 0.00257 | 0.16489  | 0.01642 | 0.02075 | 0.00072 | 0.348446 | 117 | 516  | 214.75 | 132.4  | 4.56  | 155    | 14.31 | 131.6  | 51.55  | 132.4  |
| 74321_46 | 0.07496 | 0.00603 | 0.04705 | 0.01657 | 1.67514  | 0.12792 | 0.16209 | 0.00469 | 0.378904 | 103 | 1068 | 153.74 | 968.4  | 26.03 | 999.1  | 48.56 | 929.3  | 319.78 | 968.4  |
| 74321_47 | 0.05282 | 0.0044  | 0.00812 | 0.00067 | 0.18561  | 0.01503 | 0.02551 | 0.00064 | 0.309822 | 106 | 321  | 178.55 | 162.4  | 4.02  | 172.9  | 12.87 | 163.4  | 13.5   | 162.4  |
| 74321_48 | 0.05532 | 0.00181 | 0.0065  | 0.00029 | 0.16072  | 0.00519 | 0.02107 | 0.00033 | 0.485011 | 113 | 425  | 70.91  | 134.4  | 2.06  | 151.3  | 4.54  | 131    | 5.86   | 134.4  |
| 74321_49 | 0.05086 | 0.00223 | 0.00798 | 0.00052 | 0.17294  | 0.00738 | 0.02467 | 0.00044 | 0.417948 | 103 | 235  | 97.9   | 157.1  | 2.76  | 162    | 6.39  | 160.6  | 10.53  | 157.1  |
| 74321_51 | 0.05208 | 0.00262 | 0.00523 | 0.00031 | 0.10908  | 0.00535 | 0.01519 | 0.00028 | 0.37583  | 108 | 289  | 111.19 | 97.2   | 1.76  | 105.1  | 4.89  | 105.5  | 6.33   | 97.2   |
| 74321_52 | 0.05595 | 0.00281 | 0.0081  | 0.00054 | 0.1408   | 0.0069  | 0.01825 | 0.00034 | 0.380163 | 115 | 450  | 108.25 | 116.6  | 2.14  | 133.8  | 6.14  | 163.1  | 10.85  | 116.6  |
| 74321_53 | 0.26391 | 0.00388 | 0.16837 | 0.00868 | 21.23709 | 0.33824 | 0.58348 | 0.00748 | 0.804907 | 91  | 3270 | 22.93  | 2962.9 | 30.43 | 3149.5 | 15.44 | 3145.2 | 150.24 | 3270.2 |
| 74321_54 | 0.05291 | 0.00313 | 0.00705 | 0.00045 | 0.14163  | 0.0082  | 0.01941 | 0.00036 | 0.320345 | 109 | 325  | 128.6  | 123.9  | 2.29  | 134.5  | 7.29  | 142    | 9.05   | 123.9  |
| 74321_55 | 0.09915 | 0.00183 | 0.08749 | 0.00492 | 3.97424  | 0.07569 | 0.29068 | 0.00395 | 0.713506 | 102 | 1608 | 33.93  | 1644.9 | 19.74 | 1629   | 15.45 | 1695.2 | 91.43  | 1608.2 |
| 74321_56 | 0.04986 | 0.00193 | 0.00529 | 0.00042 | 0.10905  | 0.00414 | 0.01587 | 0.00027 | 0.448138 | 104 | 188  | 87.72  | 101.5  | 1.69  | 105.1  | 3.79  | 106.7  | 8.51   | 101.5  |



|                 |         |         |         |         |         |         |         |         |          |     |        |        |        |       |        |       |        |        |               |
|-----------------|---------|---------|---------|---------|---------|---------|---------|---------|----------|-----|--------|--------|--------|-------|--------|-------|--------|--------|---------------|
| <b>74321_57</b> | 0.04888 | 0.00415 | 0.00432 | 0.00031 | 0.08948 | 0.00744 | 0.01328 | 0.0003  | 0.271692 | 102 | 142    | 188.12 | 85     | 1.88  | 87     | 6.94  | 87.1   | 6.34   | <b>85</b>     |
| <b>74321_58</b> | 0.05258 | 0.00204 | 0.01414 | 0.001   | 0.29507 | 0.01122 | 0.0407  | 0.00066 | 0.426463 | 102 | 311    | 85.86  | 257.2  | 4.07  | 262.5  | 8.8   | 283.7  | 19.97  | <b>257.2</b>  |
| <b>74321_59</b> | 0.13328 | 0.00272 | 0.11406 | 0.00865 | 7.11511 | 0.1505  | 0.38723 | 0.00559 | 0.682477 | 99  | 2142   | 35.24  | 2110   | 25.98 | 2125.9 | 18.83 | 2183.2 | 156.92 | <b>2141.6</b> |
| <b>74321_60</b> | 0.08926 | 0.00375 | 0.0078  | 0.00057 | 0.25645 | 0.01035 | 0.02084 | 0.00039 | 0.463692 | 174 | 1410   | 78.35  | 133    | 2.46  | 231.8  | 8.37  | 157    | 11.51  | <b>133</b>    |
| <b>74321_61</b> | 0.06742 | 0.00135 | 0.02181 | 0.00092 | 0.39465 | 0.00833 | 0.04247 | 0.00063 | 0.70279  | 126 | 851    | 41.15  | 268.1  | 3.91  | 337.8  | 6.06  | 436.1  | 18.3   | <b>268.1</b>  |
| <b>74321_62</b> | 0.05896 | 0.00178 | 0.00494 | 0.00017 | 0.13005 | 0.00391 | 0.016   | 0.00025 | 0.519701 | 121 | 566    | 64.42  | 102.3  | 1.56  | 124.1  | 3.52  | 99.7   | 3.34   | <b>102.3</b>  |
| <b>74321_63</b> | 0.06452 | 0.00134 | 0.02769 | 0.00128 | 0.73254 | 0.01565 | 0.08237 | 0.00117 | 0.664866 | 109 | 759    | 43.1   | 510.2  | 6.99  | 558    | 9.17  | 552    | 25.26  | <b>510.2</b>  |
| <b>74321_64</b> | 0.14392 | 0.00359 | 0.01133 | 0.00039 | 0.34816 | 0.00837 | 0.01755 | 0.00028 | 0.663643 | 271 | 2275   | 42.39  | 112.1  | 1.8   | 303.3  | 6.3   | 227.8  | 7.71   | <b>112.1</b>  |
| <b>74321_65</b> | 0.06411 | 0.00122 | 0.02704 | 0.00112 | 0.89413 | 0.01824 | 0.10116 | 0.00149 | 0.722027 | 104 | 745    | 39.73  | 621.2  | 8.73  | 648.6  | 9.78  | 539.4  | 22.03  | <b>621.2</b>  |
| <b>74321_66</b> | 0.08078 | 0.00124 | 0.0496  | 0.00205 | 2.21209 | 0.03832 | 0.19868 | 0.00282 | 0.819355 | 96  | 1216   | 29.79  | 1168.2 | 15.19 | 1184.9 | 12.11 | 978.5  | 39.48  | <b>1216.1</b> |
| <b>74321_67</b> | 0.11367 | 0.00325 | 0.00667 | 0.00028 | 0.25852 | 0.00724 | 0.0165  | 0.00029 | 0.627581 | 221 | 1859   | 50.81  | 105.5  | 1.81  | 233.5  | 5.85  | 134.4  | 5.69   | <b>105.5</b>  |
| <b>74321_68</b> | 0.06337 | 0.00126 | 0.02599 | 0.00097 | 0.80424 | 0.01676 | 0.09205 | 0.0013  | 0.67769  | 106 | 721    | 41.73  | 567.6  | 7.66  | 599.2  | 9.43  | 518.6  | 19.12  | <b>567.6</b>  |
| <b>74321_69</b> | 0.05141 | 0.00089 | 0.01341 | 0.00054 | 0.31116 | 0.00577 | 0.0439  | 0.00059 | 0.724762 | 99  | 259    | 39.23  | 277    | 3.65  | 275.1  | 4.46  | 269.2  | 10.87  | <b>277</b>    |
| <b>74321_70</b> | 0.06058 | 0.00091 | 0.02412 | 0.0009  | 0.7507  | 0.01269 | 0.08988 | 0.00123 | 0.809556 | 102 | 624    | 31.99  | 554.8  | 7.29  | 568.6  | 7.36  | 481.7  | 17.78  | <b>554.8</b>  |
| <b>74321_71</b> | 0.06478 | 0.00208 | 0.00551 | 0.00024 | 0.15193 | 0.00486 | 0.01701 | 0.00027 | 0.496211 | 132 | 767    | 66.17  | 108.7  | 1.72  | 143.6  | 4.28  | 111    | 4.89   | <b>108.7</b>  |
| <b>74321_72</b> | 0.06774 | 0.0023  | 0.00727 | 0.00037 | 0.20779 | 0.00698 | 0.02224 | 0.00036 | 0.481878 | 135 | 861    | 69.01  | 141.8  | 2.3   | 191.7  | 5.87  | 146.4  | 7.33   | <b>141.8</b>  |
| <b>74321_73</b> | 0.06046 | 0.00188 | 0.02563 | 0.00303 | 0.75366 | 0.02342 | 0.0904  | 0.00153 | 0.544643 | 102 | 620    | 65.85  | 557.9  | 9.07  | 570.3  | 13.56 | 511.4  | 59.67  | <b>557.9</b>  |
| <b>74321_74</b> | 0.16433 | 0.00624 | 0.15774 | 0.02272 | 3.21566 | 0.12002 | 0.14194 | 0.0027  | 0.509654 | 171 | 2501   | 62.54  | 855.6  | 15.24 | 1460.9 | 28.91 | 2960.4 | 396.63 | <b>855.6</b>  |
| <b>74321_75</b> | 0.06902 | 0.00167 | 0.04331 | 0.00428 | 1.47813 | 0.03649 | 0.15533 | 0.00236 | 0.615454 | 99  | 900    | 49.23  | 930.8  | 13.19 | 921.5  | 14.95 | 856.9  | 82.94  | <b>930.8</b>  |
| <b>74321_76</b> | 0.05212 | 0.00165 | 0.01167 | 0.00135 | 0.28479 | 0.00897 | 0.03963 | 0.00066 | 0.528752 | 102 | 291    | 70.49  | 250.6  | 4.12  | 254.5  | 7.09  | 234.5  | 26.92  | <b>250.6</b>  |
| <b>74321_77</b> | 0.0597  | 0.00212 | 0.02421 | 0.0032  | 0.80125 | 0.0281  | 0.09736 | 0.00178 | 0.521316 | 100 | 593    | 74.66  | 598.9  | 10.45 | 597.5  | 15.84 | 483.5  | 63.21  | <b>598.9</b>  |
| <b>74321_78</b> | 0.07835 | 0.00444 | 0.01022 | 0.00125 | 0.18072 | 0.00997 | 0.01673 | 0.00035 | 0.379213 | 158 | 1156   | 108.57 | 107    | 2.21  | 168.7  | 8.57  | 205.6  | 25.1   | <b>107</b>    |
| <b>74321_79</b> | 0.06059 | 0.00183 | 0.02627 | 0.00288 | 0.77602 | 0.02338 | 0.0929  | 0.00152 | 0.543071 | 102 | 625    | 63.79  | 572.6  | 8.97  | 583.2  | 13.37 | 524    | 56.75  | <b>572.6</b>  |
| <b>74321_80</b> | 0.06137 | 0.0017  | 0.029   | 0.00327 | 0.85727 | 0.02391 | 0.10133 | 0.00161 | 0.569673 | 101 | 652    | 58.46  | 622.2  | 9.43  | 628.6  | 13.07 | 577.7  | 64.3   | <b>622.2</b>  |
| <b>74322_01</b> | 0.07454 | 0.00108 | 0.0515  | 0.00172 | 1.75806 | 0.02974 | 0.17108 | 0.00246 | 0.850019 | 96  | 1055.8 | 29.22  | 1018   | 13.56 | 1030.1 | 10.95 | 1015   | 33.07  | <b>1055.8</b> |
| <b>74322_02</b> | 0.05714 | 0.00118 | 0.02405 | 0.00092 | 0.62678 | 0.0138  | 0.07956 | 0.00121 | 0.690759 | 100 | 496.5  | 44.86  | 493.5  | 7.21  | 494.1  | 8.61  | 480.4  | 18.07  | <b>493.5</b>  |
| <b>74322_03</b> | 0.07649 | 0.00183 | 0.05455 | 0.00212 | 1.93292 | 0.04772 | 0.18329 | 0.00298 | 0.658553 | 98  | 1107.9 | 47.15  | 1084.9 | 16.22 | 1092.5 | 16.52 | 1073.6 | 40.57  | <b>1107.9</b> |
| <b>74322_04</b> | 0.05991 | 0.00134 | 0.03188 | 0.00131 | 0.8581  | 0.0201  | 0.1039  | 0.00162 | 0.665643 | 99  | 600.2  | 47.61  | 637.2  | 9.44  | 629.1  | 10.98 | 634.3  | 25.72  | <b>637.2</b>  |
| <b>74322_05</b> | 0.05833 | 0.0054  | 0.00539 | 0.0005  | 0.12587 | 0.01112 | 0.01565 | 0.00051 | 0.36887  | 120 | 541.6  | 191.18 | 100.1  | 3.25  | 120.4  | 10.03 | 108.7  | 9.97   | <b>100.1</b>  |
| <b>74322_06</b> | 0.08287 | 0.00226 | 0.05416 | 0.00231 | 2.23742 | 0.06169 | 0.19583 | 0.00337 | 0.624142 | 91  | 1266.2 | 52.25  | 1152.9 | 18.16 | 1192.8 | 19.35 | 1066.1 | 44.35  | <b>1266.2</b> |
| <b>74322_07</b> | 0.13719 | 0.00226 | 0.085   | 0.0037  | 6.11903 | 0.11324 | 0.32352 | 0.00489 | 0.816752 | 82  | 2192   | 28.34  | 1806.9 | 23.82 | 1993   | 16.15 | 1648.8 | 69.01  | <b>2192</b>   |
| <b>74322_08</b> | 0.06231 | 0.0018  | 0.02839 | 0.00147 | 0.85192 | 0.02485 | 0.09916 | 0.00168 | 0.580825 | 103 | 684.9  | 60.41  | 609.5  | 9.85  | 625.7  | 13.62 | 565.9  | 28.89  | <b>609.5</b>  |
| <b>74322_09</b> | 0.05914 | 0.00154 | 0.02848 | 0.00152 | 0.77922 | 0.02082 | 0.09556 | 0.00156 | 0.610981 | 99  | 572.4  | 55.59  | 588.3  | 9.19  | 585    | 11.88 | 567.6  | 29.78  | <b>588.3</b>  |

|          |         |         |         |         |         |         |         |         |          |     |        |        |        |       |        |       |        |        |               |
|----------|---------|---------|---------|---------|---------|---------|---------|---------|----------|-----|--------|--------|--------|-------|--------|-------|--------|--------|---------------|
| 74322_10 | 0.05938 | 0.00447 | 0.00537 | 0.00037 | 0.14167 | 0.01022 | 0.01731 | 0.00048 | 0.384389 | 122 | 581.1  | 155.55 | 110.6  | 3.05  | 134.5  | 9.09  | 108.2  | 7.51   | <b>110.6</b>  |
| 74322_11 | 0.0623  | 0.0053  | 0.00637 | 0.00051 | 0.16615 | 0.01346 | 0.01934 | 0.00061 | 0.38934  | 126 | 684.4  | 171.83 | 123.5  | 3.85  | 156.1  | 11.72 | 128.4  | 10.34  | <b>123.5</b>  |
| 74322_12 | 0.05434 | 0.00265 | 0.00507 | 0.00032 | 0.13744 | 0.00653 | 0.01835 | 0.00038 | 0.43586  | 112 | 385.1  | 105.39 | 117.2  | 2.4   | 130.8  | 5.83  | 102.2  | 6.5    | <b>117.2</b>  |
| 74322_13 | 0.04954 | 0.00188 | 0.00573 | 0.00036 | 0.14059 | 0.00532 | 0.02058 | 0.00037 | 0.475115 | 102 | 173.5  | 86.13  | 131.3  | 2.32  | 133.6  | 4.73  | 115.4  | 7.25   | <b>131.3</b>  |
| 74322_14 | 0.0565  | 0.00485 | 0.00442 | 0.00038 | 0.11647 | 0.00957 | 0.01495 | 0.00046 | 0.374472 | 117 | 471.1  | 180.25 | 95.7   | 2.92  | 111.9  | 8.71  | 89.1   | 7.65   | <b>95.7</b>   |
| 74322_15 | 0.06304 | 0.00247 | 0.02374 | 0.00147 | 0.75902 | 0.02928 | 0.08733 | 0.0017  | 0.504624 | 106 | 709.7  | 81.16  | 539.7  | 10.11 | 573.4  | 16.9  | 474.2  | 29.08  | <b>539.7</b>  |
| 74322_16 | 0.04813 | 0.00504 | 0.00429 | 0.00039 | 0.10111 | 0.01022 | 0.01524 | 0.00051 | 0.331077 | 100 | 105.5  | 230.52 | 97.5   | 3.22  | 97.8   | 9.43  | 86.5   | 7.91   | <b>97.5</b>   |
| 74322_17 | 0.05745 | 0.00152 | 0.02388 | 0.00128 | 0.72102 | 0.01978 | 0.09103 | 0.00152 | 0.608667 | 98  | 508.5  | 57.49  | 561.6  | 8.96  | 551.3  | 11.67 | 476.9  | 25.36  | <b>561.6</b>  |
| 74322_18 | 0.05997 | 0.00132 | 0.02622 | 0.00134 | 0.7945  | 0.01874 | 0.0961  | 0.00154 | 0.679394 | 100 | 602.4  | 46.89  | 591.5  | 9.03  | 593.7  | 10.6  | 523.1  | 26.45  | <b>591.5</b>  |
| 74322_19 | 0.06064 | 0.00221 | 0.02224 | 0.00128 | 0.72322 | 0.02619 | 0.08651 | 0.00162 | 0.517111 | 103 | 626.4  | 76.59  | 534.9  | 9.61  | 552.6  | 15.43 | 444.6  | 25.23  | <b>534.9</b>  |
| 74322_20 | 0.09947 | 0.00169 | 0.06955 | 0.00368 | 3.76852 | 0.07331 | 0.2748  | 0.0042  | 0.78567  | 97  | 1614.2 | 31.34  | 1565.1 | 21.25 | 1586.1 | 15.61 | 1359.1 | 69.55  | <b>1614.2</b> |
| 74322_21 | 0.04973 | 0.00239 | 0.00663 | 0.00044 | 0.1728  | 0.00816 | 0.0252  | 0.00051 | 0.428571 | 101 | 182.4  | 108.29 | 160.5  | 3.2   | 161.8  | 7.06  | 133.7  | 8.75   | <b>160.5</b>  |
| 74322_22 | 0.05924 | 0.00166 | 0.02282 | 0.00138 | 0.71075 | 0.02039 | 0.08703 | 0.00147 | 0.588773 | 101 | 575.9  | 59.71  | 537.9  | 8.72  | 545.2  | 12.1  | 456.1  | 27.28  | <b>537.9</b>  |
| 74322_23 | 0.06001 | 0.00265 | 0.02206 | 0.00153 | 0.66456 | 0.02873 | 0.08032 | 0.00163 | 0.469421 | 104 | 604    | 92.64  | 498.1  | 9.72  | 517.4  | 17.53 | 441    | 30.25  | <b>498.1</b>  |
| 74322_24 | 0.06182 | 0.00148 | 0.02616 | 0.00174 | 0.82772 | 0.02078 | 0.09712 | 0.00157 | 0.643916 | 102 | 667.8  | 50.44  | 597.5  | 9.24  | 612.3  | 11.54 | 521.9  | 34.31  | <b>597.5</b>  |
| 74322_25 | 0.06649 | 0.00207 | 0.01202 | 0.00086 | 0.36636 | 0.01143 | 0.03997 | 0.0007  | 0.56134  | 125 | 821.7  | 63.55  | 252.6  | 4.36  | 317    | 8.49  | 241.5  | 17.09  | <b>252.6</b>  |
| 74322_26 | 0.04696 | 0.0069  | 0.00382 | 0.00056 | 0.10206 | 0.01451 | 0.01577 | 0.00065 | 0.289914 | 98  | 46.7   | 318.1  | 100.8  | 4.14  | 98.7   | 13.37 | 77     | 11.37  | <b>100.8</b>  |
| 74322_27 | 0.06019 | 0.00213 | 0.02107 | 0.00167 | 0.62671 | 0.02208 | 0.07552 | 0.00138 | 0.518662 | 105 | 610.4  | 74.82  | 469.3  | 8.28  | 494    | 13.78 | 421.5  | 33.02  | <b>469.3</b>  |
| 74322_28 | 0.06042 | 0.00483 | 0.00377 | 0.00037 | 0.1073  | 0.00819 | 0.01288 | 0.00038 | 0.38653  | 125 | 618.6  | 163.62 | 82.5   | 2.42  | 103.5  | 7.51  | 76     | 7.47   | <b>82.5</b>   |
| 74322_29 | 0.05833 | 0.00139 | 0.02524 | 0.00249 | 0.70335 | 0.0175  | 0.08747 | 0.0014  | 0.643283 | 100 | 541.3  | 52.23  | 540.5  | 8.32  | 540.8  | 10.43 | 503.9  | 49.11  | <b>540.5</b>  |
| 74322_30 | 0.0626  | 0.00193 | 0.02778 | 0.00246 | 0.85309 | 0.02647 | 0.09884 | 0.00171 | 0.557576 | 103 | 694.7  | 64.46  | 607.6  | 10.05 | 626.3  | 14.51 | 553.8  | 48.29  | <b>607.6</b>  |
| 74322_31 | 0.08258 | 0.00224 | 0.04857 | 0.00262 | 2.19072 | 0.06045 | 0.19238 | 0.00339 | 0.638602 | 90  | 1259.3 | 51.94  | 1134.3 | 18.31 | 1178.1 | 19.24 | 958.6  | 50.43  | <b>1259.3</b> |
| 74322_32 | 0.0775  | 0.00137 | 0.05073 | 0.00279 | 2.05373 | 0.04058 | 0.19215 | 0.00297 | 0.782253 | 100 | 1134.2 | 34.7   | 1133   | 16.04 | 1133.5 | 13.49 | 1000.2 | 53.69  | <b>1134.2</b> |
| 74322_33 | 0.0519  | 0.00223 | 0.01005 | 0.00064 | 0.26699 | 0.01135 | 0.03731 | 0.00071 | 0.447643 | 102 | 280.8  | 95.36  | 236.1  | 4.4   | 240.3  | 9.1   | 202.1  | 12.87  | <b>236.1</b>  |
| 74322_34 | 0.0852  | 0.00343 | 0.05448 | 0.00352 | 2.26242 | 0.08838 | 0.19255 | 0.0041  | 0.545079 | 86  | 1320   | 76.09  | 1135.2 | 22.18 | 1200.7 | 27.51 | 1072.2 | 67.42  | <b>1320</b>   |
| 74322_35 | 0.05162 | 0.00272 | 0.00459 | 0.00033 | 0.1099  | 0.00563 | 0.01544 | 0.00033 | 0.417211 | 107 | 268.5  | 116.48 | 98.8   | 2.11  | 105.9  | 5.15  | 92.6   | 6.72   | <b>98.8</b>   |
| 74322_36 | 0.05317 | 0.0036  | 0.00989 | 0.00079 | 0.28463 | 0.0186  | 0.03882 | 0.00099 | 0.390254 | 104 | 335.9  | 146.11 | 245.5  | 6.13  | 254.3  | 14.71 | 198.9  | 15.72  | <b>245.5</b>  |
| 74322_37 | 0.06496 | 0.00553 | 0.02745 | 0.00328 | 0.85883 | 0.06982 | 0.09587 | 0.00307 | 0.393897 | 107 | 773.1  | 169.52 | 590.1  | 18.07 | 629.5  | 38.14 | 547.4  | 64.53  | <b>590.1</b>  |
| 74322_38 | 0.05181 | 0.0035  | 0.01087 | 0.00097 | 0.27718 | 0.01809 | 0.0388  | 0.00097 | 0.383057 | 101 | 276.9  | 147.7  | 245.4  | 6.04  | 248.4  | 14.38 | 218.5  | 19.32  | <b>245.4</b>  |
| 74322_39 | 0.06027 | 0.00324 | 0.02241 | 0.00204 | 0.71852 | 0.03725 | 0.08646 | 0.00196 | 0.437274 | 103 | 613.2  | 111.92 | 534.6  | 11.64 | 549.8  | 22.01 | 448.1  | 40.25  | <b>534.6</b>  |
| 74322_40 | 0.10644 | 0.00273 | 0.07404 | 0.00594 | 4.27366 | 0.11075 | 0.29119 | 0.00489 | 0.64802  | 95  | 1739.3 | 46.18  | 1647.5 | 24.43 | 1688.3 | 21.32 | 1443.6 | 111.76 | <b>1739.3</b> |
| 74322_41 | 0.05674 | 0.00303 | 0.01139 | 0.00067 | 0.24891 | 0.01288 | 0.03182 | 0.0007  | 0.425133 | 112 | 480.9  | 114.13 | 201.9  | 4.36  | 225.7  | 10.47 | 228.9  | 13.34  | <b>201.9</b>  |
| 74322_42 | 0.07092 | 0.00138 | 0.05284 | 0.00278 | 1.5609  | 0.03285 | 0.15965 | 0.00241 | 0.717279 | 100 | 955    | 39.33  | 954.8  | 13.39 | 954.8  | 13.03 | 1040.7 | 53.39  | <b>954.8</b>  |

|          |         |         |         |         |         |         |         |         |          |     |        |        |        |       |        |       |        |        |               |
|----------|---------|---------|---------|---------|---------|---------|---------|---------|----------|-----|--------|--------|--------|-------|--------|-------|--------|--------|---------------|
| 74322_43 | 0.06327 | 0.00304 | 0.03163 | 0.00205 | 0.88348 | 0.04116 | 0.10129 | 0.00217 | 0.459848 | 103 | 717.3  | 98.8   | 621.9  | 12.68 | 642.9  | 22.19 | 629.4  | 40.23  | <b>621.9</b>  |
| 74322_44 | 0.05568 | 0.00166 | 0.01489 | 0.00094 | 0.35326 | 0.01066 | 0.04602 | 0.00077 | 0.554474 | 106 | 439.2  | 64.96  | 290    | 4.72  | 307.2  | 7.99  | 298.7  | 18.69  | <b>290</b>    |
| 74322_45 | 0.05428 | 0.00204 | 0.01834 | 0.00117 | 0.38185 | 0.01421 | 0.05103 | 0.00093 | 0.489729 | 102 | 382.6  | 81.71  | 320.8  | 5.68  | 328.4  | 10.44 | 367.4  | 23.22  | <b>320.8</b>  |
| 74322_46 | 0.05231 | 0.0024  | 0.01098 | 0.00075 | 0.219   | 0.00982 | 0.03037 | 0.0006  | 0.440595 | 104 | 299    | 101.12 | 192.9  | 3.76  | 201.1  | 8.18  | 220.7  | 15.01  | <b>192.9</b>  |
| 74322_47 | 0.05144 | 0.00187 | 0.00949 | 0.00063 | 0.18268 | 0.00658 | 0.02576 | 0.00046 | 0.495766 | 104 | 260.7  | 81.17  | 164    | 2.87  | 170.4  | 5.65  | 190.8  | 12.69  | <b>164</b>    |
| 74322_48 | 0.05315 | 0.00405 | 0.00531 | 0.00049 | 0.1159  | 0.0085  | 0.01582 | 0.00043 | 0.370618 | 110 | 335.1  | 163.72 | 101.2  | 2.74  | 111.3  | 7.74  | 107.1  | 9.92   | <b>101.2</b>  |
| 74322_49 | 0.06454 | 0.0044  | 0.00682 | 0.00064 | 0.14754 | 0.00961 | 0.01658 | 0.00044 | 0.407431 | 132 | 759.5  | 137.61 | 106    | 2.81  | 139.7  | 8.51  | 137.4  | 12.86  | <b>106</b>    |
| 74322_50 | 0.05042 | 0.00163 | 0.01075 | 0.00081 | 0.19584 | 0.00637 | 0.02818 | 0.00048 | 0.523675 | 101 | 214.2  | 73.24  | 179.1  | 3.01  | 181.6  | 5.41  | 216.1  | 16.17  | <b>179.1</b>  |
| 74322_51 | 0.05246 | 0.00531 | 0.01065 | 0.00124 | 0.23185 | 0.02251 | 0.03206 | 0.0011  | 0.353395 | 104 | 305.5  | 215.49 | 203.4  | 6.89  | 211.7  | 18.55 | 214.1  | 24.79  | <b>203.4</b>  |
| 74322_52 | 0.06076 | 0.00151 | 0.04    | 0.00329 | 0.92235 | 0.02392 | 0.1101  | 0.00177 | 0.619898 | 99  | 630.8  | 52.79  | 673.3  | 10.27 | 663.6  | 12.64 | 792.8  | 63.93  | <b>673.3</b>  |
| 74322_53 | 0.07276 | 0.00211 | 0.0579  | 0.00501 | 1.64882 | 0.04853 | 0.16437 | 0.00282 | 0.582894 | 101 | 1007.3 | 57.69  | 981    | 15.6  | 989.1  | 18.6  | 1137.6 | 95.64  | <b>981</b>    |
| 74322_54 | 0.09028 | 0.00433 | 0.03639 | 0.00339 | 1.11962 | 0.05149 | 0.08996 | 0.00209 | 0.505178 | 137 | 1431.3 | 89.05  | 555.3  | 12.33 | 762.8  | 24.67 | 722.5  | 66.11  | <b>555.3</b>  |
| 74322_55 | 0.05941 | 0.00221 | 0.02988 | 0.00288 | 0.68936 | 0.0255  | 0.08417 | 0.00156 | 0.501041 | 102 | 582    | 78.88  | 520.9  | 9.3   | 532.4  | 15.33 | 595.2  | 56.54  | <b>520.9</b>  |
| 74322_56 | 0.0578  | 0.00183 | 0.03243 | 0.00194 | 0.71547 | 0.0228  | 0.08979 | 0.00156 | 0.545197 | 99  | 521.9  | 68.21  | 554.3  | 9.22  | 548    | 13.5  | 645    | 38.03  | <b>554.3</b>  |
| 74322_57 | 0.11266 | 0.00224 | 0.1184  | 0.00643 | 5.1947  | 0.11158 | 0.33445 | 0.00529 | 0.736374 | 101 | 1842.7 | 35.56  | 1859.9 | 25.57 | 1851.7 | 18.29 | 2261.7 | 116.17 | <b>1842.7</b> |
| 74322_58 | 0.0636  | 0.00136 | 0.03969 | 0.00256 | 0.97636 | 0.02229 | 0.11135 | 0.00174 | 0.684477 | 102 | 728.4  | 44.65  | 680.6  | 10.08 | 691.7  | 11.45 | 786.7  | 49.7   | <b>680.6</b>  |
| 74322_59 | 0.06426 | 0.0033  | 0.01618 | 0.00107 | 0.34037 | 0.01688 | 0.03842 | 0.00086 | 0.451357 | 122 | 750.4  | 104.91 | 243    | 5.32  | 297.5  | 12.79 | 324.4  | 21.24  | <b>243</b>    |
| 74322_60 | 0.05907 | 0.00193 | 0.03654 | 0.00226 | 0.85377 | 0.02796 | 0.10483 | 0.00185 | 0.538877 | 98  | 569.7  | 69.51  | 642.7  | 10.8  | 626.7  | 15.32 | 725.3  | 44.09  | <b>642.7</b>  |
| 74322_61 | 0.05064 | 0.00347 | 0.01735 | 0.0014  | 0.31077 | 0.02056 | 0.04451 | 0.00113 | 0.38374  | 98  | 224.5  | 150.85 | 280.7  | 6.95  | 274.8  | 15.93 | 347.7  | 27.72  | <b>280.7</b>  |
| 74322_62 | 0.05794 | 0.00216 | 0.03367 | 0.00224 | 0.73741 | 0.02726 | 0.0923  | 0.00172 | 0.504092 | 99  | 527.3  | 80.04  | 569.2  | 10.13 | 560.9  | 15.93 | 669.4  | 43.87  | <b>569.2</b>  |
| 74322_63 | 0.16888 | 0.00376 | 0.08874 | 0.00594 | 6.55552 | 0.15274 | 0.28156 | 0.00467 | 0.711869 | 63  | 2546.5 | 36.82  | 1599.2 | 23.5  | 2053.4 | 20.53 | 1718.4 | 110.33 | <b>2546.5</b> |
| 74322_64 | 0.06523 | 0.00226 | 0.03581 | 0.00276 | 0.91877 | 0.03164 | 0.10216 | 0.00187 | 0.531534 | 106 | 781.8  | 71.15  | 627.1  | 10.96 | 661.7  | 16.74 | 711.1  | 53.88  | <b>627.1</b>  |
| 74322_65 | 0.0632  | 0.00199 | 0.03623 | 0.00262 | 0.8654  | 0.0274  | 0.09932 | 0.00174 | 0.553323 | 104 | 715    | 65.52  | 610.4  | 10.23 | 633.1  | 14.91 | 719.3  | 51.19  | <b>610.4</b>  |
| 74322_66 | 0.07615 | 0.00295 | 0.05835 | 0.00473 | 1.83861 | 0.06995 | 0.17512 | 0.00351 | 0.526833 | 95  | 1099.1 | 75.66  | 1040.3 | 19.23 | 1059.4 | 25.02 | 1146.3 | 90.25  | <b>1099.1</b> |
| 74322_67 | 0.05169 | 0.00154 | 0.01241 | 0.00095 | 0.25288 | 0.00766 | 0.03548 | 0.0006  | 0.558282 | 102 | 271.8  | 66.97  | 224.8  | 3.73  | 228.9  | 6.21  | 249.2  | 18.99  | <b>224.8</b>  |
| 74322_68 | 0.05468 | 0.00233 | 0.00549 | 0.00044 | 0.10675 | 0.00447 | 0.01416 | 0.00028 | 0.472232 | 114 | 399.2  | 92.19  | 90.6   | 1.76  | 103    | 4.1   | 110.7  | 8.88   | <b>90.6</b>   |
| 74322_69 | 0.06089 | 0.00322 | 0.0175  | 0.0015  | 0.38271 | 0.01956 | 0.04559 | 0.00103 | 0.442047 | 114 | 635.5  | 109.75 | 287.4  | 6.32  | 329    | 14.36 | 350.7  | 29.75  | <b>287.4</b>  |
| 74322_70 | 0.05971 | 0.00167 | 0.03472 | 0.00336 | 0.80358 | 0.02301 | 0.09761 | 0.00164 | 0.586762 | 100 | 593.5  | 59.32  | 600.4  | 9.63  | 598.8  | 12.95 | 689.8  | 65.65  | <b>600.4</b>  |
| 74322_71 | 0.12468 | 0.00289 | 0.12697 | 0.00942 | 6.17892 | 0.15222 | 0.35943 | 0.00617 | 0.696806 | 98  | 2024.3 | 40.46  | 1979.5 | 29.25 | 2001.5 | 21.53 | 2416.1 | 169    | <b>2024.3</b> |
| 74322_72 | 0.06031 | 0.00151 | 0.03994 | 0.00331 | 0.82466 | 0.02173 | 0.09917 | 0.00168 | 0.642901 | 100 | 614.8  | 53.25  | 609.5  | 9.83  | 610.6  | 12.09 | 791.5  | 64.27  | <b>609.5</b>  |
| 74322_73 | 0.06673 | 0.00526 | 0.00701 | 0.00072 | 0.14244 | 0.01067 | 0.01548 | 0.00048 | 0.41394  | 137 | 829.4  | 156.29 | 99     | 3.04  | 135.2  | 9.49  | 141.2  | 14.39  | <b>99</b>     |
| 74322_74 | 0.05136 | 0.00184 | 0.01784 | 0.00162 | 0.30943 | 0.01109 | 0.04369 | 0.00081 | 0.51729  | 99  | 257    | 80.3   | 275.7  | 5     | 273.7  | 8.6   | 357.5  | 32.13  | <b>275.7</b>  |
| 74322_75 | 0.05792 | 0.00439 | 0.01114 | 0.00116 | 0.23564 | 0.01713 | 0.0295  | 0.00085 | 0.396359 | 115 | 526.6  | 158.46 | 187.4  | 5.32  | 214.8  | 14.07 | 223.9  | 23.29  | <b>187.4</b>  |

|                 |         |         |         |         |          |         |         |         |          |     |        |        |        |       |        |       |       |        |               |
|-----------------|---------|---------|---------|---------|----------|---------|---------|---------|----------|-----|--------|--------|--------|-------|--------|-------|-------|--------|---------------|
| <b>74322_76</b> | 0.05202 | 0.00223 | 0.01945 | 0.00209 | 0.32093  | 0.01354 | 0.04474 | 0.00089 | 0.471504 | 100 | 286.3  | 95.04  | 282.2  | 5.5   | 282.6  | 10.41 | 389.4 | 41.4   | <b>282.2</b>  |
| <b>74322_77</b> | 0.05636 | 0.00198 | 0.03874 | 0.00431 | 0.72049  | 0.02516 | 0.09272 | 0.00171 | 0.528129 | 96  | 465.7  | 75.94  | 571.6  | 10.1  | 551    | 14.85 | 768.3 | 83.87  | <b>571.6</b>  |
| <b>74322_78</b> | 0.05854 | 0.00353 | 0.02635 | 0.00515 | 0.71082  | 0.04133 | 0.08806 | 0.00218 | 0.425767 | 100 | 550.2  | 126.53 | 544.1  | 12.9  | 545.2  | 24.53 | 525.7 | 101.45 | <b>544.1</b>  |
| <b>74322_79</b> | 0.05109 | 0.00535 | 0.00495 | 0.0008  | 0.10053  | 0.01008 | 0.01427 | 0.00051 | 0.356436 | 107 | 245    | 224.21 | 91.3   | 3.21  | 97.3   | 9.3   | 99.8  | 16     | <b>91.3</b>   |
| <b>74322_80</b> | 0.074   | 0.00406 | 0.04821 | 0.00784 | 1.44374  | 0.07595 | 0.1415  | 0.00346 | 0.464816 | 106 | 1041.5 | 106.99 | 853.1  | 19.53 | 907.3  | 31.56 | 951.7 | 151.09 | <b>853.1</b>  |
| <b>74323_01</b> | 0.05927 | 0.00226 | 0.02197 | 0.00334 | 0.70726  | 0.02709 | 0.08653 | 0.00161 | 0.485768 | 102 | 577.1  | 80.87  | 535    | 9.56  | 543.1  | 16.11 | 439.2 | 65.97  | <b>535</b>    |
| <b>74323_02</b> | 0.05138 | 0.00257 | 0.00778 | 0.00064 | 0.19448  | 0.00971 | 0.02746 | 0.00046 | 0.335516 | 103 | 257.8  | 110.89 | 174.6  | 2.89  | 180.4  | 8.25  | 156.6 | 12.89  | <b>174.6</b>  |
| <b>74323_03</b> | 0.05098 | 0.01174 | 0.00526 | 0.00084 | 0.11459  | 0.02612 | 0.01631 | 0.00059 | 0.158698 | 106 | 240    | 458.67 | 104.3  | 3.71  | 110.2  | 23.79 | 106   | 16.86  | <b>104.3</b>  |
| <b>74323_04</b> | 0.05237 | 0.00171 | 0.01124 | 0.00099 | 0.30482  | 0.0101  | 0.04222 | 0.00066 | 0.471789 | 101 | 301.8  | 72.77  | 266.6  | 4.05  | 270.2  | 7.86  | 225.8 | 19.75  | <b>266.6</b>  |
| <b>74323_05</b> | 0.18965 | 0.00353 | 0.11086 | 0.00968 | 11.91712 | 0.24033 | 0.45586 | 0.00663 | 0.721183 | 88  | 2739.1 | 30.29  | 2421.2 | 29.35 | 2597.9 | 18.89 | 2125  | 176.15 | <b>2739.1</b> |
| <b>74323_06</b> | 0.06188 | 0.0089  | 0.00758 | 0.00084 | 0.2261   | 0.03223 | 0.02651 | 0.00067 | 0.177299 | 123 | 670    | 281.04 | 168.6  | 4.2   | 207    | 26.69 | 152.5 | 16.79  | <b>168.6</b>  |
| <b>74323_07</b> | 0.07173 | 0.00249 | 0.04865 | 0.00567 | 1.66885  | 0.05706 | 0.1688  | 0.00283 | 0.490342 | 103 | 978.2  | 69.11  | 1005.5 | 15.62 | 996.7  | 21.71 | 960.1 | 109.19 | <b>978.2</b>  |
| <b>74323_08</b> | 0.04816 | 0.01077 | 0.00502 | 0.00065 | 0.10397  | 0.0231  | 0.01566 | 0.00049 | 0.140832 | 100 | 107    | 457.6  | 100.2  | 3.09  | 100.4  | 21.24 | 101.1 | 13.06  | <b>100.2</b>  |
| <b>74323_09</b> | 0.06225 | 0.00269 | 0.02621 | 0.00292 | 0.78761  | 0.03355 | 0.09179 | 0.0016  | 0.409207 | 104 | 682.6  | 89.75  | 566.1  | 9.46  | 589.8  | 19.06 | 522.9 | 57.55  | <b>566.1</b>  |
| <b>74323_10</b> | 0.05651 | 0.00228 | 0.02508 | 0.00261 | 0.72198  | 0.02914 | 0.09269 | 0.00153 | 0.408973 | 97  | 471.6  | 87.79  | 571.4  | 9     | 551.8  | 17.18 | 500.6 | 51.37  | <b>571.4</b>  |
| <b>74323_11</b> | 0.05153 | 0.00627 | 0.00857 | 0.00108 | 0.25251  | 0.03048 | 0.03555 | 0.00081 | 0.18876  | 102 | 264.5  | 257.52 | 225.2  | 5.03  | 228.6  | 24.71 | 172.4 | 21.57  | <b>225.2</b>  |
| <b>74323_12</b> | 0.0713  | 0.00169 | 0.04031 | 0.00457 | 1.62202  | 0.03972 | 0.16504 | 0.00246 | 0.608685 | 99  | 965.9  | 47.64  | 984.7  | 13.59 | 978.8  | 15.38 | 798.7 | 88.79  | <b>984.7</b>  |
| <b>74323_13</b> | 0.05875 | 0.00514 | 0.02135 | 0.00331 | 0.73172  | 0.06313 | 0.09038 | 0.00215 | 0.275724 | 100 | 557.8  | 180.21 | 557.8  | 12.71 | 557.6  | 37.02 | 427   | 65.54  | <b>557.8</b>  |
| <b>74323_14</b> | 0.0603  | 0.00418 | 0.02633 | 0.00364 | 0.7704   | 0.05218 | 0.09269 | 0.00197 | 0.313795 | 102 | 614.2  | 142.99 | 571.4  | 11.65 | 580    | 29.93 | 525.2 | 71.6   | <b>571.4</b>  |
| <b>74323_15</b> | 0.05033 | 0.02141 | 0.00354 | 0.00215 | 0.19529  | 0.08263 | 0.02815 | 0.00133 | 0.111665 | 101 | 210.2  | 768.3  | 178.9  | 8.31  | 181.1  | 70.19 | 71.4  | 43.4   | <b>178.9</b>  |
| <b>74323_16</b> | 0.0424  | 0.01015 | 0.00717 | 0.00128 | 0.15377  | 0.03661 | 0.02631 | 0.00078 | 0.124522 | 87  | 0.1    | 309.14 | 167.4  | 4.91  | 145.2  | 32.22 | 144.3 | 25.73  | <b>167.4</b>  |
| <b>74323_17</b> | 0.03736 | 0.00574 | 0.00767 | 0.00103 | 0.1301   | 0.0199  | 0.02526 | 0.00056 | 0.144937 | 77  | 0.1    | 0      | 160.8  | 3.52  | 124.2  | 17.88 | 154.4 | 20.66  | <b>160.8</b>  |
| <b>74323_18</b> | 0.0617  | 0.00168 | 0.02885 | 0.00373 | 0.98514  | 0.02713 | 0.11582 | 0.00178 | 0.558065 | 99  | 663.7  | 57.18  | 706.4  | 10.26 | 696.2  | 13.88 | 574.8 | 73.26  | <b>706.4</b>  |
| <b>74323_19</b> | 0.06161 | 0.00177 | 0.03264 | 0.00433 | 1.03604  | 0.02986 | 0.12198 | 0.0019  | 0.540445 | 97  | 660.4  | 60.44  | 741.9  | 10.9  | 721.9  | 14.89 | 649.1 | 84.69  | <b>741.9</b>  |
| <b>74323_20</b> | 0.06114 | 0.00181 | 0.03203 | 0.00427 | 1.01483  | 0.03001 | 0.12038 | 0.00189 | 0.530927 | 97  | 644.2  | 62.4   | 732.7  | 10.88 | 711.3  | 15.12 | 637.2 | 83.69  | <b>732.7</b>  |
| <b>74323_21</b> | 0.05709 | 0.00163 | 0.02672 | 0.00118 | 0.76862  | 0.02218 | 0.0977  | 0.00144 | 0.510761 | 96  | 494.5  | 62.18  | 600.9  | 8.48  | 579    | 12.73 | 533   | 23.21  | <b>600.9</b>  |
| <b>74323_22</b> | 0.06016 | 0.00134 | 0.02735 | 0.00129 | 0.80477  | 0.01839 | 0.09709 | 0.00137 | 0.617499 | 100 | 609.2  | 47.3   | 597.4  | 8.03  | 599.5  | 10.35 | 545.4 | 25.37  | <b>597.4</b>  |
| <b>74323_23</b> | 0.06032 | 0.00115 | 0.02738 | 0.00131 | 0.82172  | 0.01655 | 0.09884 | 0.00137 | 0.688198 | 100 | 615.3  | 40.51  | 607.6  | 8.05  | 609    | 9.22  | 546   | 25.7   | <b>607.6</b>  |
| <b>74323_24</b> | 0.05944 | 0.00102 | 0.02802 | 0.00135 | 0.83998  | 0.01544 | 0.10257 | 0.00138 | 0.731948 | 98  | 583.2  | 36.92  | 629.4  | 8.09  | 619.1  | 8.52  | 558.6 | 26.56  | <b>629.4</b>  |
| <b>74323_25</b> | 0.0585  | 0.00149 | 0.0254  | 0.00105 | 0.77104  | 0.02019 | 0.09564 | 0.00139 | 0.555029 | 99  | 548.7  | 54.79  | 588.8  | 8.18  | 580.4  | 11.58 | 507.1 | 20.79  | <b>588.8</b>  |
| <b>74323_26</b> | 0.05152 | 0.00473 | 0.01016 | 0.00057 | 0.21946  | 0.02    | 0.03091 | 0.0006  | 0.212999 | 103 | 264    | 197.39 | 196.3  | 3.75  | 201.5  | 16.66 | 204.2 | 11.37  | <b>196.3</b>  |
| <b>74323_27</b> | 0.05467 | 0.00446 | 0.00861 | 0.00053 | 0.22742  | 0.01839 | 0.03018 | 0.00057 | 0.233562 | 109 | 398.9  | 173.03 | 191.7  | 3.57  | 208.1  | 15.21 | 173.3 | 10.66  | <b>191.7</b>  |
| <b>74323_28</b> | 0.02787 | 0.01518 | 0.00734 | 0.00065 | 0.06342  | 0.03448 | 0.01651 | 0.00055 | 0.061274 | 59  | 0.1    | 0      | 105.6  | 3.49  | 62.4   | 32.93 | 147.7 | 13.03  | <b>105.6</b>  |

|                 |         |         |         |         |         |         |         |         |          |     |        |        |        |       |        |       |        |         |               |
|-----------------|---------|---------|---------|---------|---------|---------|---------|---------|----------|-----|--------|--------|--------|-------|--------|-------|--------|---------|---------------|
| <b>74323_29</b> | 0.04418 | 0.00299 | 0.00455 | 0.00023 | 0.09393 | 0.00633 | 0.01543 | 0.00027 | 0.259656 | 92  | 0.1    | 57.25  | 98.7   | 1.69  | 91.2   | 5.87  | 91.8   | 4.57    | <b>98.7</b>   |
| <b>74323_30</b> | 0.0475  | 0.00177 | 0.00416 | 0.00017 | 0.09856 | 0.00369 | 0.01506 | 0.00023 | 0.407922 | 99  | 73.5   | 86.99  | 96.4   | 1.45  | 95.4   | 3.41  | 83.8   | 3.52    | <b>96.4</b>   |
| <b>74323_31</b> | 0.04727 | 0.00355 | 0.0042  | 0.00188 | 0.09685 | 0.00707 | 0.01486 | 0.00036 | 0.331867 | 99  | 62.6   | 170.17 | 95.1   | 2.31  | 93.9   | 6.55  | 84.8   | 37.85   | <b>95.1</b>   |
| <b>74323_32</b> | 0.05093 | 0.0044  | 0.00416 | 0.00188 | 0.10521 | 0.00887 | 0.01498 | 0.00038 | 0.300888 | 106 | 237.8  | 187.63 | 95.9   | 2.42  | 101.6  | 8.15  | 84     | 37.78   | <b>95.9</b>   |
| <b>74323_33</b> | 0.06152 | 0.00443 | 0.0277  | 0.01258 | 0.85195 | 0.05947 | 0.10044 | 0.00246 | 0.350869 | 101 | 657.6  | 147.23 | 617    | 14.39 | 625.7  | 32.61 | 552.3  | 247.49  | <b>617</b>    |
| <b>74323_34</b> | 0.06202 | 0.00457 | 0.02804 | 0.01289 | 0.84389 | 0.06021 | 0.09869 | 0.00247 | 0.350785 | 102 | 674.9  | 150.2  | 606.7  | 14.47 | 621.3  | 33.16 | 559    | 253.44  | <b>606.7</b>  |
| <b>74323_35</b> | 0.06229 | 0.00453 | 0.02749 | 0.01279 | 0.85458 | 0.06028 | 0.09951 | 0.00245 | 0.349043 | 103 | 684    | 148.11 | 611.5  | 14.35 | 627.2  | 33    | 548.2  | 251.63  | <b>611.5</b>  |
| <b>74323_36</b> | 0.06196 | 0.00512 | 0.02581 | 0.01275 | 0.72777 | 0.0583  | 0.08519 | 0.00228 | 0.334096 | 105 | 672.7  | 167.51 | 527    | 13.57 | 555.2  | 34.26 | 515    | 251.31  | <b>527</b>    |
| <b>74323_37</b> | 0.05804 | 0.00433 | 0.02474 | 0.01173 | 0.6895  | 0.04983 | 0.08617 | 0.00217 | 0.348455 | 100 | 530.7  | 156.03 | 532.9  | 12.88 | 532.5  | 29.95 | 493.9  | 231.31  | <b>532.9</b>  |
| <b>74323_38</b> | 0.05619 | 0.00482 | 0.02464 | 0.01227 | 0.66716 | 0.05535 | 0.08612 | 0.00237 | 0.331709 | 97  | 459    | 180.42 | 532.6  | 14.06 | 519    | 33.71 | 491.9  | 242.14  | <b>532.6</b>  |
| <b>74323_39</b> | 0.08943 | 0.02264 | 0.00887 | 0.00477 | 0.34621 | 0.08638 | 0.02808 | 0.0013  | 0.185555 | 169 | 1413.4 | 419.93 | 178.5  | 8.17  | 301.9  | 65.16 | 178.4  | 95.58   | <b>178.5</b>  |
| <b>74323_40</b> | 0.05768 | 0.00478 | 0.02696 | 0.01322 | 0.72309 | 0.05804 | 0.09093 | 0.00241 | 0.330198 | 98  | 517.2  | 172.44 | 561    | 14.26 | 552.5  | 34.2  | 537.6  | 260.25  | <b>561</b>    |
| <b>74323_41</b> | 0.05901 | 0.00456 | 0.02681 | 0.01342 | 0.69543 | 0.05197 | 0.08547 | 0.00221 | 0.346003 | 101 | 567.6  | 159.86 | 528.7  | 13.12 | 536.1  | 31.12 | 534.7  | 264.24  | <b>528.7</b>  |
| <b>74323_42</b> | 0.19015 | 0.01422 | 0.11326 | 0.05682 | 9.66124 | 0.69904 | 0.36851 | 0.00933 | 0.349916 | 74  | 2743.4 | 117.99 | 2022.4 | 43.97 | 2403   | 66.58 | 2168.7 | 1031.68 | <b>2743.4</b> |
| <b>74323_43</b> | 0.05394 | 0.00287 | 0.00726 | 0.00037 | 0.16143 | 0.00844 | 0.02171 | 0.00044 | 0.387645 | 110 | 368.2  | 115.17 | 138.5  | 2.76  | 152    | 7.38  | 146.3  | 7.34    | <b>138.5</b>  |
| <b>74323_44</b> | 0.05171 | 0.001   | 0.01496 | 0.00066 | 0.31821 | 0.0065  | 0.04464 | 0.00062 | 0.679936 | 100 | 272.4  | 43.72  | 281.5  | 3.84  | 280.5  | 5     | 300.2  | 13.22   | <b>281.5</b>  |
| <b>74323_45</b> | 0.06275 | 0.00104 | 0.03568 | 0.00173 | 0.80809 | 0.01448 | 0.09341 | 0.00127 | 0.758755 | 104 | 699.7  | 34.96  | 575.7  | 7.49  | 601.4  | 8.13  | 708.7  | 33.79   | <b>575.7</b>  |
| <b>74323_46</b> | 0.0592  | 0.0011  | 0.02903 | 0.00144 | 0.68672 | 0.01337 | 0.08414 | 0.00115 | 0.702011 | 102 | 574.4  | 39.76  | 520.8  | 6.86  | 530.8  | 8.05  | 578.5  | 28.24   | <b>520.8</b>  |
| <b>74323_47</b> | 0.04389 | 0.00338 | 0.00563 | 0.0004  | 0.09979 | 0.00754 | 0.01649 | 0.00034 | 0.272881 | 92  | 0.1    | 61.94  | 105.4  | 2.15  | 96.6   | 6.96  | 113.4  | 8.08    | <b>105.4</b>  |
| <b>74323_48</b> | 0.05939 | 0.00082 | 0.03247 | 0.00146 | 0.77511 | 0.01238 | 0.09467 | 0.00129 | 0.853139 | 100 | 581.4  | 29.81  | 583.1  | 7.59  | 582.7  | 7.08  | 645.9  | 28.59   | <b>583.1</b>  |
| <b>74323_50</b> | 0.06692 | 0.00317 | 0.0059  | 0.00051 | 0.12849 | 0.00588 | 0.01393 | 0.00026 | 0.407863 | 138 | 835.3  | 95.74  | 89.2   | 1.67  | 122.7  | 5.29  | 118.8  | 10.16   | <b>89.2</b>   |
| <b>74323_51</b> | 0.05221 | 0.00106 | 0.01609 | 0.00088 | 0.35566 | 0.0077  | 0.04941 | 0.00072 | 0.673073 | 99  | 294.7  | 45.77  | 310.9  | 4.44  | 309    | 5.77  | 322.7  | 17.55   | <b>310.9</b>  |
| <b>74323_52</b> | 0.05676 | 0.00119 | 0.02836 | 0.00183 | 0.73825 | 0.01585 | 0.09434 | 0.00131 | 0.64677  | 97  | 481.5  | 45.95  | 581.2  | 7.7   | 561.4  | 9.26  | 565.3  | 35.89   | <b>581.2</b>  |
| <b>74323_53</b> | 0.05883 | 0.00144 | 0.0305  | 0.00232 | 0.75461 | 0.01905 | 0.09304 | 0.00145 | 0.617342 | 100 | 560.6  | 52.49  | 573.5  | 8.53  | 570.9  | 11.02 | 607.2  | 45.52   | <b>573.5</b>  |
| <b>74323_54</b> | 0.0711  | 0.00467 | 0.02812 | 0.00233 | 0.87583 | 0.05637 | 0.08935 | 0.00192 | 0.333871 | 116 | 960.2  | 128.8  | 551.7  | 11.39 | 638.7  | 30.52 | 560.6  | 45.76   | <b>551.7</b>  |
| <b>74323_55</b> | 0.05557 | 0.00128 | 0.01528 | 0.0012  | 0.36721 | 0.00869 | 0.04793 | 0.00071 | 0.625959 | 105 | 434.8  | 50.17  | 301.8  | 4.34  | 317.6  | 6.46  | 306.5  | 23.83   | <b>301.8</b>  |
| <b>74323_56</b> | 0.05969 | 0.00147 | 0.03136 | 0.00289 | 0.82063 | 0.02046 | 0.09971 | 0.00149 | 0.599362 | 99  | 592.9  | 51.88  | 612.7  | 8.72  | 608.4  | 11.41 | 624.2  | 56.59   | <b>612.7</b>  |
| <b>74323_57</b> | 0.05477 | 0.0031  | 0.00887 | 0.00082 | 0.19794 | 0.01101 | 0.02621 | 0.0005  | 0.342965 | 110 | 402.7  | 121.63 | 166.8  | 3.16  | 183.4  | 9.33  | 178.4  | 16.38   | <b>166.8</b>  |
| <b>74323_58</b> | 0.07647 | 0.00148 | 0.05323 | 0.00405 | 1.55061 | 0.03205 | 0.14708 | 0.00214 | 0.703938 | 107 | 1107.4 | 38.28  | 884.6  | 12.05 | 950.7  | 12.76 | 1048.3 | 77.78   | <b>884.6</b>  |
| <b>74323_59</b> | 0.04863 | 0.00133 | 0.00587 | 0.00047 | 0.11593 | 0.00323 | 0.01729 | 0.00027 | 0.560483 | 101 | 130.2  | 63.2   | 110.5  | 1.7   | 111.4  | 2.94  | 118.4  | 9.41    | <b>110.5</b>  |
| <b>74323_60</b> | 0.15105 | 0.00301 | 0.06327 | 0.00512 | 4.33552 | 0.09167 | 0.20818 | 0.00307 | 0.69745  | 52  | 2357.9 | 33.67  | 1219.1 | 16.39 | 1700.1 | 17.45 | 1240.1 | 97.36   | <b>2357.9</b> |
| <b>74323_61</b> | 0.13793 | 0.00304 | 0.05761 | 0.00518 | 3.38864 | 0.07817 | 0.1782  | 0.00272 | 0.661678 | 48  | 2201.4 | 37.84  | 1057.1 | 14.87 | 1501.8 | 18.09 | 1132.1 | 99.03   | <b>2201.4</b> |
| <b>74323_62</b> | 0.05051 | 0.0013  | 0.01058 | 0.00088 | 0.22837 | 0.00603 | 0.0328  | 0.00051 | 0.588868 | 100 | 218.5  | 58.55  | 208    | 3.15  | 208.9  | 4.98  | 212.7  | 17.52   | <b>208</b>    |

|          |         |         |         |         |         |         |         |         |          |     |        |        |        |       |        |       |        |         |        |
|----------|---------|---------|---------|---------|---------|---------|---------|---------|----------|-----|--------|--------|--------|-------|--------|-------|--------|---------|--------|
| 74323_63 | 0.05888 | 0.00128 | 0.02663 | 0.00228 | 0.69306 | 0.01584 | 0.08537 | 0.00128 | 0.656025 | 101 | 562.8  | 46.74  | 528.1  | 7.63  | 534.6  | 9.5   | 531.3  | 44.88   | 528.1  |
| 74323_64 | 0.0588  | 0.00128 | 0.03129 | 0.0028  | 0.77853 | 0.01772 | 0.09603 | 0.00144 | 0.658821 | 99  | 559.7  | 46.64  | 591.1  | 8.44  | 584.6  | 10.12 | 622.8  | 54.97   | 591.1  |
| 74323_65 | 0.05495 | 0.00368 | 0.01322 | 0.00146 | 0.28089 | 0.01847 | 0.03707 | 0.00076 | 0.311789 | 107 | 410.3  | 143.18 | 234.7  | 4.74  | 251.4  | 14.64 | 265.4  | 29.2    | 234.7  |
| 74323_66 | 0.06046 | 0.00195 | 0.02801 | 0.00322 | 0.74814 | 0.02405 | 0.08975 | 0.00152 | 0.526838 | 102 | 620.2  | 68     | 554    | 9     | 567.1  | 13.97 | 558.3  | 63.22   | 554    |
| 74323_68 | 0.05158 | 0.004   | 0.00497 | 0.00069 | 0.12291 | 0.00937 | 0.01728 | 0.00038 | 0.288461 | 107 | 266.9  | 168.5  | 110.5  | 2.38  | 117.7  | 8.48  | 100.2  | 13.94   | 110.5  |
| 74323_69 | 0.0584  | 0.00186 | 0.02535 | 0.00302 | 0.66679 | 0.02121 | 0.08282 | 0.0014  | 0.531424 | 101 | 544.7  | 68.08  | 512.9  | 8.34  | 518.8  | 12.92 | 506    | 59.45   | 512.9  |
| 74323_70 | 0.05801 | 0.00199 | 0.03129 | 0.00456 | 0.76493 | 0.02592 | 0.09563 | 0.00164 | 0.5061   | 98  | 529.9  | 73.82  | 588.8  | 9.64  | 576.9  | 14.91 | 622.8  | 89.44   | 588.8  |
| 74323_71 | 0.05197 | 0.00263 | 0.01393 | 0.00254 | 0.29808 | 0.01465 | 0.0416  | 0.00086 | 0.42063  | 101 | 284.1  | 111.65 | 262.8  | 5.35  | 264.9  | 11.46 | 279.6  | 50.63   | 262.8  |
| 74323_72 | 0.08814 | 0.00264 | 0.06882 | 0.00841 | 2.85354 | 0.08593 | 0.23482 | 0.00392 | 0.554358 | 98  | 1385.5 | 56.43  | 1359.7 | 20.46 | 1369.7 | 22.64 | 1345.3 | 159.13  | 1385.5 |
| 74323_73 | 0.05917 | 0.00239 | 0.02719 | 0.0034  | 0.75998 | 0.03024 | 0.09316 | 0.0017  | 0.458606 | 100 | 573.4  | 85.36  | 574.2  | 10.03 | 574    | 17.45 | 542.3  | 66.91   | 574.2  |
| 74323_75 | 0.06024 | 0.00249 | 0.03289 | 0.0054  | 0.8223  | 0.03325 | 0.099   | 0.00185 | 0.462142 | 100 | 612.4  | 86.9   | 608.6  | 10.85 | 609.3  | 18.53 | 654.1  | 105.75  | 608.6  |
| 74323_76 | 0.06076 | 0.00251 | 0.03335 | 0.00538 | 0.85773 | 0.03468 | 0.1024  | 0.00191 | 0.461323 | 100 | 630.6  | 86.59  | 628.4  | 11.19 | 628.9  | 18.95 | 663.2  | 105.31  | 628.4  |
| 74324_01 | 0.05087 | 0.01059 | 0.00816 | 0.00185 | 0.18872 | 0.03894 | 0.0269  | 0.00085 | 0.15314  | 103 | 234.9  | 420.43 | 171.1  | 5.35  | 175.5  | 33.26 | 164.2  | 37.01   | 171.1  |
| 74324_02 | 0.06111 | 0.00552 | 0.03824 | 0.00852 | 0.87078 | 0.07783 | 0.1033  | 0.00215 | 0.232862 | 100 | 643.2  | 183.26 | 633.7  | 12.55 | 636    | 42.24 | 758.5  | 165.83  | 633.7  |
| 74324_03 | 0.05313 | 0.00464 | 0.01419 | 0.00317 | 0.35333 | 0.03036 | 0.04822 | 0.00105 | 0.25342  | 101 | 334.2  | 186.45 | 303.6  | 6.46  | 307.2  | 22.78 | 284.8  | 63.19   | 303.6  |
| 74324_04 | 0.05398 | 0.00752 | 0.01279 | 0.00298 | 0.36731 | 0.05048 | 0.04933 | 0.00139 | 0.20503  | 102 | 369.9  | 286.79 | 310.4  | 8.53  | 317.7  | 37.49 | 256.9  | 59.38   | 310.4  |
| 74324_05 | 0.05912 | 0.00418 | 0.02664 | 0.00622 | 0.7722  | 0.05396 | 0.09469 | 0.00181 | 0.273547 | 100 | 571.5  | 146.92 | 583.2  | 10.64 | 581    | 30.91 | 531.4  | 122.44  | 583.2  |
| 74324_06 | 0.05935 | 0.00318 | 0.02569 | 0.00611 | 0.7848  | 0.04139 | 0.09586 | 0.0017  | 0.33626  | 100 | 580    | 112.18 | 590.1  | 10.03 | 588.2  | 23.55 | 512.7  | 120.45  | 590.1  |
| 74324_07 | 0.0474  | 0.01253 | 0.01153 | 0.00295 | 0.24754 | 0.06474 | 0.03786 | 0.00162 | 0.163609 | 94  | 68.9   | 532.38 | 239.5  | 10.05 | 224.6  | 52.69 | 231.7  | 59.04   | 239.5  |
| 74324_08 | 0.0586  | 0.00645 | 0.02102 | 0.00544 | 0.71447 | 0.07774 | 0.08838 | 0.00206 | 0.214216 | 100 | 552.4  | 223.8  | 545.9  | 12.22 | 547.4  | 46.04 | 420.5  | 107.77  | 545.9  |
| 74324_09 | 0.05864 | 0.00374 | 0.02471 | 0.00643 | 0.76054 | 0.0477  | 0.09401 | 0.00183 | 0.310371 | 99  | 553.8  | 133.48 | 579.2  | 10.8  | 574.3  | 27.51 | 493.3  | 126.83  | 579.2  |
| 74324_10 | 0.05316 | 0.0126  | 0.01276 | 0.00358 | 0.30681 | 0.07219 | 0.04183 | 0.00135 | 0.137163 | 103 | 335.7  | 463.07 | 264.2  | 8.38  | 271.7  | 56.09 | 256.2  | 71.47   | 264.2  |
| 74324_11 | 0.05757 | 0.00418 | 0.02293 | 0.00626 | 0.71048 | 0.05081 | 0.08945 | 0.00176 | 0.275128 | 99  | 513.2  | 152.21 | 552.3  | 10.39 | 545    | 30.16 | 458.3  | 123.72  | 552.3  |
| 74324_12 | 0.06086 | 0.00598 | 0.03883 | 0.03337 | 0.84017 | 0.08068 | 0.10007 | 0.00268 | 0.27889  | 101 | 634.4  | 198.46 | 614.8  | 15.72 | 619.2  | 44.52 | 770    | 649.27  | 614.8  |
| 74324_13 | 0.06904 | 0.01239 | 0.07263 | 0.06062 | 1.83484 | 0.32276 | 0.19274 | 0.00806 | 0.237729 | 126 | 900    | 331.8  | 1136.2 | 43.54 | 1058   | 115.6 | 1417.2 | 1142.38 | 1136.2 |
| 74324_14 | 0.04104 | 0.01504 | 0.0126  | 0.01029 | 0.189   | 0.0688  | 0.03341 | 0.00151 | 0.124158 | 83  | 0.1    | 455.22 | 211.9  | 9.45  | 175.8  | 58.75 | 253    | 205.37  | 211.9  |
| 74324_15 | 0.06198 | 0.00674 | 0.03186 | 0.02508 | 0.74082 | 0.07854 | 0.08676 | 0.00245 | 0.26636  | 105 | 673.4  | 216.96 | 536.3  | 14.54 | 562.9  | 45.81 | 633.9  | 491.32  | 536.3  |
| 74324_16 | 0.0563  | 0.00584 | 0.03401 | 0.02611 | 0.7581  | 0.07642 | 0.09777 | 0.00268 | 0.271925 | 95  | 463.6  | 215.3  | 601.3  | 15.73 | 572.9  | 44.14 | 676    | 510.34  | 601.3  |
| 74324_17 | 0.05949 | 0.00605 | 0.03428 | 0.02572 | 0.88098 | 0.08696 | 0.10757 | 0.00292 | 0.275003 | 97  | 585.2  | 206.66 | 658.6  | 16.99 | 641.5  | 46.94 | 681.2  | 502.72  | 658.6  |
| 74324_18 | 0.06596 | 0.01133 | 0.00732 | 0.00537 | 0.19304 | 0.03261 | 0.02127 | 0.0007  | 0.194817 | 132 | 805    | 323.65 | 135.7  | 4.42  | 179.2  | 27.75 | 147.3  | 107.8   | 135.7  |
| 74324_19 | 0.06628 | 0.01425 | 0.03743 | 0.02727 | 0.91746 | 0.19465 | 0.10063 | 0.00368 | 0.172367 | 107 | 815.2  | 394.82 | 618.1  | 21.55 | 661    | 103.1 | 742.8  | 531.32  | 618.1  |
| 74324_20 | 0.07398 | 0.01156 | 0.05527 | 0.03899 | 2.00744 | 0.30589 | 0.19734 | 0.00717 | 0.238441 | 112 | 1041   | 286.69 | 1161   | 38.63 | 1118   | 103.3 | 1087.3 | 746.89  | 1041   |
| 74324_21 | 0.05549 | 0.00653 | 0.02901 | 0.02009 | 0.73703 | 0.08386 | 0.09664 | 0.00293 | 0.266466 | 94  | 431.6  | 243.25 | 594.7  | 17.23 | 560.7  | 49.02 | 577.9  | 394.7   | 594.7  |

|          |         |         |         |         |         |         |         |         |          |     |        |        |        |       |        |       |        |         |        |
|----------|---------|---------|---------|---------|---------|---------|---------|---------|----------|-----|--------|--------|--------|-------|--------|-------|--------|---------|--------|
| 74324_22 | 0.0607  | 0.00699 | 0.02585 | 0.01758 | 0.81033 | 0.09    | 0.09717 | 0.00286 | 0.265004 | 101 | 628.6  | 230.43 | 597.8  | 16.79 | 602.6  | 50.48 | 515.8  | 346.41  | 597.8  |
| 74324_23 | 0.05679 | 0.00773 | 0.02404 | 0.02025 | 0.68899 | 0.09135 | 0.08792 | 0.00304 | 0.26079  | 98  | 482.6  | 276.11 | 543.2  | 17.99 | 532.2  | 54.92 | 480.2  | 399.75  | 543.2  |
| 74324_24 | 0.16962 | 0.02126 | 0.0984  | 0.08529 | 9.39997 | 1.14509 | 0.40157 | 0.01317 | 0.269223 | 85  | 2553.9 | 195.88 | 2176.2 | 60.56 | 2377.8 | 111.8 | 1897   | 1569.51 | 2553.9 |
| 74324_25 | 0.04719 | 0.01264 | 0.0094  | 0.00845 | 0.21093 | 0.05591 | 0.03239 | 0.00134 | 0.156078 | 95  | 58.4   | 539.11 | 205.5  | 8.38  | 194.3  | 46.88 | 189.2  | 169.2   | 205.5  |
| 74324_26 | 0.04618 | 0.01867 | 0.00579 | 0.00538 | 0.10505 | 0.04211 | 0.01648 | 0.00089 | 0.134724 | 96  | 7.1    | 762.37 | 105.4  | 5.64  | 101.4  | 38.69 | 116.8  | 108.05  | 105.4  |
| 74324_27 | 0.06166 | 0.00981 | 0.02857 | 0.02709 | 0.78237 | 0.12135 | 0.09192 | 0.00344 | 0.24128  | 104 | 662.5  | 308.4  | 566.9  | 20.33 | 586.8  | 69.13 | 569.4  | 532.27  | 566.9  |
| 74324_28 | 0.05934 | 0.01203 | 0.02327 | 0.02302 | 0.75493 | 0.14962 | 0.09216 | 0.00417 | 0.228302 | 100 | 579.6  | 388.4  | 568.3  | 24.6  | 571.1  | 86.57 | 464.9  | 454.78  | 568.3  |
| 74324_29 | 0.08258 | 0.01102 | 0.01071 | 0.0108  | 0.60524 | 0.07825 | 0.05309 | 0.00185 | 0.269527 | 144 | 1259.4 | 240.84 | 333.5  | 11.31 | 480.6  | 49.5  | 215.2  | 215.92  | 333.5  |
| 74324_30 | 0.06671 | 0.00905 | 0.03983 | 0.04146 | 1.17804 | 0.15482 | 0.12793 | 0.00449 | 0.267059 | 102 | 828.6  | 260.1  | 776    | 25.67 | 790.4  | 72.18 | 789.4  | 805.83  | 776    |
| 74324_31 | 0.05491 | 0.01576 | 0.00905 | 0.00982 | 0.11819 | 0.03345 | 0.01559 | 0.00076 | 0.172247 | 114 | 408.6  | 539.46 | 99.7   | 4.84  | 113.4  | 30.37 | 182    | 196.77  | 99.7   |
| 74324_32 | 0.05506 | 0.00769 | 0.02628 | 0.0292  | 0.62645 | 0.08466 | 0.0824  | 0.00295 | 0.264913 | 97  | 414.7  | 285.18 | 510.4  | 17.58 | 493.9  | 52.85 | 524.3  | 574.99  | 510.4  |
| 74324_33 | 0.01957 | 0.02704 | 0.00756 | 0.00885 | 0.04167 | 0.05753 | 0.01542 | 0.001   | 0.046973 | 42  | 0.1    | 29.25  | 98.7   | 6.35  | 41.5   | 56.08 | 152.2  | 177.53  | 98.7   |
| 74324_34 | 0.05297 | 0.00792 | 0.01361 | 0.01186 | 0.34261 | 0.05018 | 0.04686 | 0.00174 | 0.253522 | 101 | 327.4  | 308.01 | 295.2  | 10.74 | 299.1  | 37.95 | 273.3  | 236.55  | 295.2  |
| 74324_35 | 0.03918 | 0.00775 | 0.00576 | 0.005   | 0.10055 | 0.01962 | 0.01858 | 0.00072 | 0.198596 | 82  | 0.1    | 45.18  | 118.7  | 4.58  | 97.3   | 18.1  | 116    | 100.43  | 118.7  |
| 74324_36 | 0.21099 | 0.02957 | 0.10079 | 0.08757 | 9.25657 | 1.26853 | 0.3176  | 0.01189 | 0.273181 | 61  | 2913.1 | 210.54 | 1778   | 58.17 | 2363.7 | 125.6 | 1940.9 | 1607.94 | 2913.1 |
| 74324_37 | 0.05355 | 0.01143 | 0.02567 | 0.02235 | 0.69969 | 0.14729 | 0.09454 | 0.00399 | 0.200489 | 92  | 352.2  | 421.54 | 582.4  | 23.51 | 538.6  | 87.99 | 512.4  | 440.4   | 582.4  |
| 74324_38 | 0.07983 | 0.02865 | 0.0033  | 0.00315 | 0.1744  | 0.06188 | 0.0158  | 0.00093 | 0.165891 | 161 | 1192.8 | 581.17 | 101.1  | 5.89  | 163.2  | 53.5  | 66.6   | 63.49   | 101.1  |
| 74324_39 | 0.06964 | 0.01446 | 0.00571 | 0.00511 | 0.16746 | 0.03419 | 0.01739 | 0.00078 | 0.219688 | 141 | 917.7  | 377.06 | 111.1  | 4.92  | 157.2  | 29.73 | 115.1  | 102.68  | 111.1  |
| 74324_40 | 0.03948 | 0.00856 | 0.00474 | 0.00415 | 0.09113 | 0.01954 | 0.01668 | 0.00067 | 0.187334 | 83  | 0.1    | 101.5  | 106.7  | 4.24  | 88.6   | 18.19 | 95.5   | 83.58   | 106.7  |
| 74324_41 | 0.06255 | 0.00954 | 0.03664 | 0.03207 | 1.02534 | 0.15334 | 0.11845 | 0.00454 | 0.256291 | 99  | 693    | 295.09 | 721.6  | 26.16 | 716.6  | 76.87 | 727.3  | 625.26  | 721.6  |
| 74324_42 | 0.05515 | 0.00912 | 0.02471 | 0.02166 | 0.66764 | 0.10854 | 0.08744 | 0.00344 | 0.241992 | 96  | 418.1  | 332.42 | 540.4  | 20.37 | 519.3  | 66.09 | 493.3  | 427.17  | 540.4  |
| 74324_43 | 0.05998 | 0.00907 | 0.03086 | 0.02705 | 0.79024 | 0.11736 | 0.09513 | 0.0036  | 0.254814 | 101 | 602.7  | 297.37 | 585.8  | 21.2  | 591.3  | 66.56 | 614.2  | 530.38  | 585.8  |
| 74324_44 | 0.0537  | 0.02005 | 0.00544 | 0.00484 | 0.11902 | 0.04402 | 0.016   | 0.00091 | 0.153777 | 112 | 358.2  | 676.25 | 102.3  | 5.79  | 114.2  | 39.95 | 109.7  | 97.3    | 102.3  |
| 74324_45 | 0.05685 | 0.0097  | 0.01829 | 0.01634 | 0.73022 | 0.12256 | 0.09267 | 0.00375 | 0.2411   | 97  | 485    | 338.66 | 571.3  | 22.09 | 556.7  | 71.93 | 366.2  | 324.41  | 571.3  |
| 74324_46 | 0.0614  | 0.00621 | 0.03021 | 0.00538 | 0.89566 | 0.08898 | 0.10574 | 0.00268 | 0.255121 | 100 | 653.1  | 203.26 | 648    | 15.62 | 649.4  | 47.66 | 601.6  | 105.58  | 648    |
| 74324_47 | 0.05284 | 0.01075 | 0.01064 | 0.00203 | 0.29246 | 0.05907 | 0.04012 | 0.00116 | 0.143152 | 103 | 321.7  | 406.11 | 253.6  | 7.19  | 260.5  | 46.41 | 213.9  | 40.61   | 253.6  |
| 74324_48 | 0.04217 | 0.01985 | 0.00565 | 0.00121 | 0.11635 | 0.05454 | 0.02    | 0.0009  | 0.095998 | 88  | 0.1    | 674.72 | 127.6  | 5.72  | 111.8  | 49.6  | 113.9  | 24.35   | 127.6  |
| 74324_49 | 0.05452 | 0.01376 | 0.01471 | 0.00303 | 0.32548 | 0.0812  | 0.04328 | 0.00183 | 0.169485 | 105 | 392.5  | 484.56 | 273.1  | 11.34 | 286.1  | 62.2  | 295.2  | 60.34   | 273.1  |
| 74324_50 | 0.05269 | 0.00563 | 0.01176 | 0.00212 | 0.31856 | 0.03371 | 0.04383 | 0.00094 | 0.20267  | 102 | 315.6  | 225.61 | 276.5  | 5.82  | 280.8  | 25.96 | 236.3  | 42.31   | 276.5  |
| 74324_51 | 0.05082 | 0.02116 | 0.01701 | 0.00387 | 0.30099 | 0.12465 | 0.04293 | 0.00196 | 0.110244 | 99  | 232.9  | 752.5  | 271    | 12.1  | 267.2  | 97.28 | 340.8  | 76.87   | 271    |
| 74324_52 | 0.13724 | 0.00458 | 0.09747 | 0.01757 | 6.87356 | 0.22883 | 0.36311 | 0.00595 | 0.492207 | 91  | 2192.7 | 56.83  | 1996.9 | 28.12 | 2095.3 | 29.51 | 1879.8 | 323.66  | 2192.7 |
| 74324_53 | 0.04736 | 0.00841 | 0.01014 | 0.00204 | 0.21906 | 0.0385  | 0.03354 | 0.00103 | 0.174734 | 95  | 66.9   | 376.19 | 212.6  | 6.44  | 201.1  | 32.07 | 204    | 40.9    | 212.6  |
| 74324_54 | 0.05203 | 0.00881 | 0.00894 | 0.00187 | 0.26405 | 0.04431 | 0.0368  | 0.00102 | 0.165172 | 102 | 286.7  | 346.79 | 233    | 6.34  | 237.9  | 35.59 | 180    | 37.46   | 233    |

|          |         |         |         |         |         |         |         |         |          |     |        |        |        |       |        |       |        |        |        |
|----------|---------|---------|---------|---------|---------|---------|---------|---------|----------|-----|--------|--------|--------|-------|--------|-------|--------|--------|--------|
| 74324_55 | 0.04811 | 0.0144  | 0.00511 | 0.00133 | 0.11581 | 0.0344  | 0.01746 | 0.00072 | 0.138828 | 100 | 104.5  | 587.09 | 111.6  | 4.56  | 111.3  | 31.3  | 102.9  | 26.76  | 111.6  |
| 74324_56 | 0.07552 | 0.0034  | 0.04735 | 0.01018 | 1.69904 | 0.07562 | 0.16314 | 0.00292 | 0.402151 | 103 | 1082.5 | 87.8   | 974.2  | 16.19 | 1008.2 | 28.45 | 935.1  | 196.37 | 974.2  |
| 74324_57 | 0.05092 | 0.01211 | 0.01002 | 0.00245 | 0.25531 | 0.06019 | 0.03636 | 0.00129 | 0.150491 | 100 | 237.1  | 471.93 | 230.2  | 8.01  | 230.9  | 48.68 | 201.6  | 48.97  | 230.2  |
| 74324_58 | 0.04918 | 0.00472 | 0.01358 | 0.00317 | 0.30922 | 0.02931 | 0.0456  | 0.001   | 0.231359 | 95  | 156.3  | 210.13 | 287.4  | 6.19  | 273.6  | 22.73 | 272.6  | 63.29  | 287.4  |
| 74324_59 | 0.06636 | 0.00266 | 0.03905 | 0.00915 | 1.22319 | 0.04897 | 0.13369 | 0.0022  | 0.411043 | 100 | 817.6  | 81.5   | 808.9  | 12.53 | 811.2  | 22.36 | 774.2  | 177.92 | 808.9  |
| 74324_60 | 0.05581 | 0.00346 | 0.01738 | 0.00426 | 0.47354 | 0.02892 | 0.06154 | 0.00125 | 0.332591 | 102 | 444.4  | 132.69 | 385    | 7.57  | 393.6  | 19.93 | 348.3  | 84.6   | 385    |
| 74324_61 | 0.07426 | 0.00234 | 0.04953 | 0.00375 | 1.5159  | 0.04628 | 0.14806 | 0.00245 | 0.542008 | 105 | 1048.5 | 62.21  | 890.1  | 13.74 | 936.8  | 18.68 | 977.1  | 72.23  | 890.1  |
| 74324_62 | 0.06169 | 0.00208 | 0.03262 | 0.0028  | 0.74163 | 0.02425 | 0.08719 | 0.00145 | 0.508601 | 105 | 663.4  | 70.6   | 538.9  | 8.58  | 563.4  | 14.14 | 648.8  | 54.87  | 538.9  |
| 74324_63 | 0.06069 | 0.00162 | 0.03469 | 0.00312 | 0.83275 | 0.02184 | 0.09953 | 0.00151 | 0.578475 | 101 | 628.1  | 56.39  | 611.6  | 8.83  | 615.1  | 12.1  | 689.2  | 60.88  | 611.6  |
| 74324_64 | 0.06117 | 0.00212 | 0.03052 | 0.00315 | 0.71926 | 0.02416 | 0.08528 | 0.00145 | 0.506186 | 104 | 645.2  | 72.64  | 527.6  | 8.6   | 550.2  | 14.27 | 607.7  | 61.7   | 527.6  |
| 74324_65 | 0.05199 | 0.00306 | 0.01912 | 0.00217 | 0.38069 | 0.02156 | 0.0531  | 0.00118 | 0.392383 | 98  | 285.1  | 129.11 | 333.5  | 7.22  | 327.5  | 15.86 | 382.8  | 43.1   | 333.5  |
| 74324_66 | 0.06173 | 0.00232 | 0.03306 | 0.00396 | 0.80372 | 0.02938 | 0.09443 | 0.00169 | 0.489587 | 103 | 664.8  | 78.42  | 581.7  | 9.97  | 598.9  | 16.54 | 657.4  | 77.47  | 581.7  |
| 74324_67 | 0.05382 | 0.00358 | 0.00958 | 0.00129 | 0.19269 | 0.01235 | 0.02597 | 0.00064 | 0.384503 | 108 | 363.3  | 143.27 | 165.3  | 4.01  | 178.9  | 10.51 | 192.6  | 25.86  | 165.3  |
| 74324_68 | 0.10333 | 0.00381 | 0.0828  | 0.01194 | 3.39821 | 0.12308 | 0.23852 | 0.00446 | 0.516265 | 82  | 1684.8 | 66.49  | 1379   | 23.23 | 1504   | 28.41 | 1607.8 | 222.95 | 1684.8 |
| 74324_69 | 0.0708  | 0.00295 | 0.05275 | 0.00831 | 1.55012 | 0.06375 | 0.1588  | 0.00313 | 0.479269 | 100 | 951.5  | 83.13  | 950.1  | 17.41 | 950.5  | 25.38 | 1038.9 | 159.5  | 950.1  |
| 74324_70 | 0.0635  | 0.00344 | 0.03328 | 0.0057  | 0.82521 | 0.04363 | 0.09425 | 0.00216 | 0.433463 | 105 | 725.1  | 110.78 | 580.6  | 12.71 | 610.9  | 24.27 | 661.8  | 111.49 | 580.6  |
| 74324_71 | 0.1131  | 0.00587 | 0.11104 | 0.02449 | 5.45258 | 0.27724 | 0.34965 | 0.00778 | 0.437615 | 104 | 1849.7 | 91.06  | 1932.9 | 37.16 | 1893.2 | 43.63 | 2128.3 | 445.49 | 1849.7 |
| 74324_72 | 0.0591  | 0.00394 | 0.03015 | 0.00684 | 0.71008 | 0.04567 | 0.08713 | 0.00227 | 0.405074 | 101 | 570.9  | 138.64 | 538.5  | 13.45 | 544.8  | 27.12 | 600.4  | 134.24 | 538.5  |
| 74324_73 | 0.54235 | 0.03895 | 0.10102 | 0.02354 | 4.16363 | 0.2577  | 0.05568 | 0.00234 | 0.679007 | 477 | 4360.7 | 101.28 | 349.3  | 14.31 | 1666.9 | 50.67 | 1945.1 | 432.13 | 349.3  |
| 74324_74 | 0.0519  | 0.00314 | 0.01692 | 0.00401 | 0.32839 | 0.01915 | 0.04589 | 0.0011  | 0.411051 | 100 | 280.9  | 132.63 | 289.2  | 6.77  | 288.3  | 14.63 | 339.1  | 79.61  | 289.2  |
| 74324_75 | 0.06329 | 0.00365 | 0.03819 | 0.00925 | 0.97635 | 0.05423 | 0.11187 | 0.00261 | 0.420042 | 101 | 718.1  | 118.01 | 683.6  | 15.14 | 691.7  | 27.86 | 757.4  | 180.16 | 683.6  |
| 74324_76 | 0.07158 | 0.00598 | 0.00722 | 0.00182 | 0.15862 | 0.0126  | 0.01607 | 0.0005  | 0.391689 | 145 | 973.9  | 161.64 | 102.8  | 3.15  | 149.5  | 11.04 | 145.4  | 36.59  | 102.8  |
| 74324_77 | 0.05852 | 0.0036  | 0.03403 | 0.00859 | 0.74086 | 0.04353 | 0.09182 | 0.00222 | 0.411494 | 99  | 549.3  | 129.06 | 566.3  | 13.13 | 562.9  | 25.39 | 676.3  | 167.9  | 566.3  |
| 74324_78 | 0.06991 | 0.00467 | 0.05213 | 0.0136  | 1.44138 | 0.09147 | 0.14953 | 0.00392 | 0.413102 | 101 | 925.8  | 131.3  | 898.3  | 21.96 | 906.3  | 38.04 | 1027   | 261.18 | 898.3  |
| 74324_79 | 0.05775 | 0.0038  | 0.02992 | 0.00789 | 0.66269 | 0.04131 | 0.08322 | 0.0021  | 0.404806 | 100 | 520.1  | 138.49 | 515.3  | 12.52 | 516.3  | 25.23 | 595.8  | 154.85 | 515.3  |
| 74324_80 | 0.10799 | 0.00694 | 0.0977  | 0.02636 | 4.29598 | 0.25987 | 0.28854 | 0.00735 | 0.421102 | 93  | 1765.7 | 113.06 | 1634.2 | 36.75 | 1692.6 | 49.82 | 1884.1 | 485.42 | 1765.7 |
| 74325_01 | 0.07103 | 0.00129 | 0.05137 | 0.00307 | 1.47851 | 0.02709 | 0.15105 | 0.00187 | 0.675672 | 102 | 958    | 36.71  | 906.9  | 10.47 | 921.6  | 11.1  | 1012.5 | 59.05  | 906.9  |
| 74325_02 | 0.05419 | 0.00207 | 0.00505 | 0.00028 | 0.10509 | 0.00393 | 0.01407 | 0.00022 | 0.418117 | 113 | 379    | 83.12  | 90.1   | 1.41  | 101.5  | 3.62  | 101.8  | 5.6    | 90.1   |
| 74325_03 | 0.05886 | 0.00161 | 0.02587 | 0.00138 | 0.7331  | 0.01997 | 0.09037 | 0.00132 | 0.53621  | 100 | 562    | 58.56  | 557.7  | 7.82  | 558.4  | 11.7  | 516.3  | 27.25  | 557.7  |
| 74325_04 | 0.09628 | 0.0016  | 0.0683  | 0.0036  | 3.05453 | 0.0532  | 0.23014 | 0.00299 | 0.745954 | 86  | 1553   | 30.86  | 1335.2 | 15.68 | 1421.4 | 13.32 | 1335.3 | 68.04  | 1553.3 |
| 74325_05 | 0.09019 | 0.00422 | 0.01881 | 0.00145 | 0.58764 | 0.02631 | 0.04728 | 0.00099 | 0.467679 | 158 | 1430   | 86.82  | 297.8  | 6.09  | 469.4  | 16.83 | 376.7  | 28.8   | 297.8  |
| 74325_06 | 0.08678 | 0.0024  | 0.0526  | 0.00405 | 2.49998 | 0.06938 | 0.20897 | 0.00343 | 0.591442 | 90  | 1356   | 52.38  | 1223.3 | 18.31 | 1272   | 20.13 | 1036.2 | 77.73  | 1355.6 |
| 74325_07 | 0.0592  | 0.00152 | 0.02474 | 0.00149 | 0.69268 | 0.01777 | 0.08487 | 0.00122 | 0.560339 | 102 | 574    | 54.72  | 525.1  | 7.26  | 534.4  | 10.66 | 494    | 29.32  | 525.1  |



|          |         |         |         |         |         |         |         |         |          |     |      |        |        |       |        |       |        |        |        |
|----------|---------|---------|---------|---------|---------|---------|---------|---------|----------|-----|------|--------|--------|-------|--------|-------|--------|--------|--------|
| 74325_08 | 0.0749  | 0.00198 | 0.0356  | 0.00295 | 1.47391 | 0.0398  | 0.14272 | 0.00228 | 0.591613 | 107 | 1066 | 52.35  | 860    | 12.85 | 919.7  | 16.34 | 707.1  | 57.62  | 860    |
| 74325_09 | 0.05361 | 0.00138 | 0.01567 | 0.00105 | 0.39143 | 0.01013 | 0.05294 | 0.00076 | 0.554721 | 101 | 355  | 57.07  | 332.6  | 4.66  | 335.4  | 7.39  | 314.3  | 20.95  | 332.6  |
| 74325_10 | 0.10567 | 0.00196 | 0.08115 | 0.00538 | 4.4598  | 0.08705 | 0.30606 | 0.00418 | 0.699707 | 100 | 1726 | 33.63  | 1721.3 | 20.64 | 1723.5 | 16.19 | 1577   | 100.53 | 1726   |
| 74325_11 | 0.06019 | 0.00134 | 0.02527 | 0.00176 | 0.7899  | 0.01812 | 0.09517 | 0.00136 | 0.622949 | 101 | 610  | 47.39  | 586    | 8     | 591.1  | 10.28 | 504.5  | 34.71  | 586    |
| 74325_12 | 0.05452 | 0.00302 | 0.01086 | 0.00111 | 0.34429 | 0.01863 | 0.0458  | 0.00097 | 0.391397 | 104 | 393  | 119.4  | 288.7  | 6     | 300.4  | 14.07 | 218.3  | 22.11  | 288.7  |
| 74325_13 | 0.05287 | 0.00202 | 0.01365 | 0.00176 | 0.33756 | 0.01257 | 0.04632 | 0.0008  | 0.463807 | 101 | 323  | 84.71  | 291.9  | 4.91  | 295.3  | 9.54  | 274    | 35.05  | 291.9  |
| 74325_14 | 0.05973 | 0.00253 | 0.01149 | 0.00174 | 0.15852 | 0.0065  | 0.01926 | 0.00035 | 0.443182 | 121 | 594  | 89.27  | 123    | 2.21  | 149.4  | 5.7   | 231    | 34.85  | 123    |
| 74325_15 | 0.08046 | 0.0061  | 0.00561 | 0.00078 | 0.17978 | 0.01308 | 0.01621 | 0.00042 | 0.356123 | 162 | 1208 | 142.33 | 103.7  | 2.68  | 167.9  | 11.26 | 113.2  | 15.76  | 103.7  |
| 74325_16 | 0.04998 | 0.00219 | 0.00564 | 0.00085 | 0.13274 | 0.00564 | 0.01927 | 0.00035 | 0.427473 | 103 | 194  | 98.84  | 123    | 2.22  | 126.6  | 5.06  | 113.7  | 17.13  | 123    |
| 74325_17 | 0.10671 | 0.00497 | 0.07737 | 0.01369 | 3.1642  | 0.14232 | 0.21515 | 0.00445 | 0.45985  | 72  | 1744 | 83.03  | 1256.2 | 23.6  | 1448.5 | 34.7  | 1506.3 | 256.91 | 1744   |
| 74325_18 | 0.05385 | 0.00201 | 0.02    | 0.00292 | 0.50821 | 0.01852 | 0.06848 | 0.00118 | 0.472847 | 98  | 365  | 81.78  | 427    | 7.12  | 417.2  | 12.47 | 400.3  | 57.85  | 427    |
| 74325_20 | 0.06111 | 0.00346 | 0.02704 | 0.00578 | 0.7423  | 0.04048 | 0.08814 | 0.00195 | 0.405696 | 104 | 643  | 117.38 | 544.5  | 11.58 | 563.7  | 23.59 | 539.3  | 113.79 | 544.5  |
| 74325_21 | 0.10822 | 0.00724 | 0.09062 | 0.02482 | 4.47704 | 0.28836 | 0.30011 | 0.00811 | 0.419562 | 96  | 1770 | 117.4  | 1691.8 | 40.23 | 1726.7 | 53.46 | 1753.3 | 459.89 | 1769.6 |
| 74325_22 | 0.05027 | 0.00418 | 0.01366 | 0.00405 | 0.3141  | 0.02516 | 0.04531 | 0.0014  | 0.385737 | 97  | 208  | 182.2  | 285.7  | 8.66  | 277.4  | 19.44 | 274.2  | 80.72  | 285.7  |
| 74325_23 | 0.07194 | 0.0044  | 0.00734 | 0.00125 | 0.19121 | 0.0113  | 0.01928 | 0.00044 | 0.386169 | 144 | 984  | 119.64 | 123.1  | 2.75  | 177.7  | 9.63  | 147.9  | 25.05  | 123.1  |
| 74325_24 | 0.05107 | 0.00269 | 0.00809 | 0.00142 | 0.17507 | 0.009   | 0.02487 | 0.0005  | 0.391078 | 103 | 244  | 117.02 | 158.4  | 3.16  | 163.8  | 7.77  | 162.9  | 28.52  | 158.4  |
| 74325_25 | 0.06525 | 0.00465 | 0.02369 | 0.00724 | 0.76363 | 0.05221 | 0.0849  | 0.00229 | 0.394509 | 110 | 782  | 143.15 | 525.3  | 13.62 | 576.1  | 30.06 | 473.3  | 142.86 | 525.3  |
| 74325_26 | 0.09726 | 0.008   | 0.06423 | 0.02012 | 2.73574 | 0.21505 | 0.20403 | 0.00643 | 0.400915 | 76  | 1572 | 146.63 | 1196.9 | 34.41 | 1338.2 | 58.45 | 1258.2 | 382.08 | 1572.3 |
| 74325_27 | 0.06544 | 0.00481 | 0.02541 | 0.00733 | 0.7786  | 0.05499 | 0.08631 | 0.00238 | 0.390433 | 110 | 789  | 147.21 | 533.7  | 14.12 | 584.7  | 31.39 | 507.1  | 144.41 | 533.7  |
| 74325_28 | 0.05876 | 0.00466 | 0.00959 | 0.00292 | 0.27204 | 0.02066 | 0.03358 | 0.00098 | 0.38428  | 115 | 558  | 164.02 | 212.9  | 6.12  | 244.3  | 16.49 | 192.8  | 58.53  | 212.9  |
| 74325_29 | 0.05637 | 0.00439 | 0.01422 | 0.00413 | 0.40515 | 0.03026 | 0.05213 | 0.00148 | 0.38012  | 105 | 466  | 164.63 | 327.6  | 9.09  | 345.4  | 21.86 | 285.3  | 82.35  | 327.6  |
| 74325_30 | 0.06376 | 0.00404 | 0.02722 | 0.00703 | 0.78938 | 0.0481  | 0.0898  | 0.00218 | 0.398402 | 107 | 734  | 128.77 | 554.4  | 12.88 | 590.8  | 27.3  | 542.9  | 138.42 | 554.4  |
| 74325_31 | 0.092   | 0.00718 | 0.0805  | 0.02442 | 2.14001 | 0.15969 | 0.16873 | 0.00492 | 0.390761 | 68  | 1467 | 141.55 | 1005.1 | 27.13 | 1161.8 | 51.64 | 1564.8 | 456.78 | 1467.3 |
| 74325_32 | 0.08976 | 0.01202 | 0.04678 | 0.02484 | 2.19582 | 0.28002 | 0.17745 | 0.00819 | 0.361923 | 74  | 1420 | 236.43 | 1053   | 44.84 | 1179.7 | 88.97 | 924.1  | 479.55 | 1420.4 |
| 74325_33 | 0.08548 | 0.00747 | 0.00759 | 0.00221 | 0.24919 | 0.02083 | 0.02115 | 0.00066 | 0.373315 | 167 | 1327 | 160.4  | 134.9  | 4.15  | 225.9  | 16.93 | 152.9  | 44.3   | 134.9  |
| 74325_34 | 0.0792  | 0.00596 | 0.05221 | 0.01519 | 1.91246 | 0.13811 | 0.17516 | 0.00487 | 0.385    | 88  | 1177 | 142.08 | 1040.5 | 26.73 | 1085.4 | 48.15 | 1028.6 | 291.84 | 1177   |
| 74325_36 | 0.07294 | 0.0059  | 0.02772 | 0.0083  | 0.97013 | 0.07493 | 0.09647 | 0.00283 | 0.379812 | 116 | 1012 | 155.77 | 593.7  | 16.62 | 688.5  | 38.62 | 552.7  | 163.26 | 593.7  |
| 74325_38 | 0.06063 | 0.00758 | 0.03093 | 0.01632 | 0.83631 | 0.10016 | 0.10013 | 0.00439 | 0.366078 | 100 | 626  | 248.9  | 615.2  | 25.72 | 617.1  | 55.38 | 615.8  | 319.88 | 615.2  |
| 74325_39 | 0.12022 | 0.01293 | 0.00938 | 0.00354 | 0.32474 | 0.03314 | 0.01961 | 0.00079 | 0.39476  | 228 | 1960 | 180.46 | 125.2  | 4.98  | 285.5  | 25.4  | 188.6  | 70.83  | 125.2  |
| 74325_40 | 0.05281 | 0.00421 | 0.01597 | 0.00463 | 0.36559 | 0.02811 | 0.05022 | 0.00139 | 0.359974 | 100 | 321  | 171.03 | 315.9  | 8.51  | 316.4  | 20.9  | 320.3  | 92.14  | 315.9  |
| 74325_42 | 0.05736 | 0.00469 | 0.01647 | 0.00568 | 0.3562  | 0.02795 | 0.04506 | 0.00135 | 0.381816 | 109 | 505  | 170.76 | 284.1  | 8.31  | 309.4  | 20.93 | 330.3  | 112.91 | 284.1  |
| 74325_43 | 0.05049 | 0.00396 | 0.01148 | 0.0038  | 0.26202 | 0.01972 | 0.03766 | 0.00109 | 0.384569 | 99  | 218  | 171.91 | 238.3  | 6.75  | 236.3  | 15.87 | 230.8  | 75.85  | 238.3  |
| 74325_44 | 0.08204 | 0.01087 | 0.05276 | 0.02724 | 2.21913 | 0.28072 | 0.19644 | 0.00941 | 0.378677 | 93  | 1246 | 239.36 | 1156.1 | 50.72 | 1187.1 | 88.55 | 1039.3 | 523.02 | 1246.4 |

|          |         |         |         |         |         |         |         |         |          |     |        |        |        |        |        |       |        |         |        |
|----------|---------|---------|---------|---------|---------|---------|---------|---------|----------|-----|--------|--------|--------|--------|--------|-------|--------|---------|--------|
| 74325_46 | 0.06477 | 0.00645 | 0.0183  | 0.00751 | 0.40463 | 0.03855 | 0.04533 | 0.00164 | 0.379745 | 121 | 767    | 196.83 | 285.8  | 10.13  | 345    | 27.86 | 366.6  | 148.99  | 285.8  |
| 74325_47 | 0.05509 | 0.00723 | 0.00677 | 0.00373 | 0.14785 | 0.01845 | 0.01948 | 0.00089 | 0.366122 | 113 | 416    | 269.34 | 124.4  | 5.6    | 140    | 16.32 | 136.3  | 74.79   | 124.4  |
| 74325_48 | 0.04878 | 0.00478 | 0.00531 | 0.00175 | 0.10442 | 0.00988 | 0.01553 | 0.00048 | 0.32666  | 102 | 138    | 215.1  | 99.3   | 3.05   | 100.8  | 9.08  | 106.9  | 35.24   | 99.3   |
| 74325_49 | 0.0699  | 0.00654 | 0.03145 | 0.01243 | 1.30404 | 0.11678 | 0.13535 | 0.00466 | 0.384459 | 104 | 926    | 181.17 | 818.3  | 26.48  | 847.5  | 51.46 | 626    | 243.62  | 818.3  |
| 74325_51 | 0.05988 | 0.00672 | 0.03092 | 0.01561 | 0.78015 | 0.08272 | 0.09447 | 0.00367 | 0.366387 | 101 | 599    | 225.95 | 581.9  | 21.64  | 585.6  | 47.19 | 615.5  | 306.04  | 581.9  |
| 74325_52 | 0.06248 | 0.00687 | 0.02753 | 0.01335 | 0.7869  | 0.08208 | 0.09134 | 0.00354 | 0.371556 | 105 | 691    | 218.67 | 563.5  | 20.93  | 589.4  | 46.64 | 548.9  | 262.57  | 563.5  |
| 74325_53 | 0.05522 | 0.00511 | 0.01318 | 0.00548 | 0.32021 | 0.0282  | 0.04205 | 0.00137 | 0.369948 | 106 | 421    | 194.4  | 265.6  | 8.49   | 282.1  | 21.69 | 264.6  | 109.39  | 265.6  |
| 74325_54 | 0.07186 | 0.01001 | 0.05425 | 0.03352 | 1.67468 | 0.22227 | 0.16899 | 0.00822 | 0.36649  | 102 | 982    | 260.35 | 1006.6 | 45.33  | 999    | 84.38 | 1067.8 | 642.58  | 982.1  |
| 74325_55 | 0.05399 | 0.00707 | 0.00798 | 0.00333 | 0.17098 | 0.02166 | 0.02297 | 0.00087 | 0.298982 | 109 | 371    | 270.83 | 146.4  | 5.48   | 160.3  | 18.79 | 160.6  | 66.82   | 146.4  |
| 74325_56 | 0.05958 | 0.00564 | 0.00586 | 0.00234 | 0.14735 | 0.01334 | 0.01794 | 0.00059 | 0.363265 | 122 | 589    | 193.02 | 114.6  | 3.71   | 139.6  | 11.81 | 118.2  | 47.04   | 114.6  |
| 74325_57 | 0.05192 | 0.00497 | 0.00649 | 0.0026  | 0.13881 | 0.01277 | 0.01939 | 0.00063 | 0.353177 | 107 | 282    | 204.96 | 123.8  | 3.98   | 132    | 11.38 | 130.8  | 52.17   | 123.8  |
| 74325_58 | 0.1182  | 0.01077 | 0.09978 | 0.04297 | 4.91377 | 0.42891 | 0.30149 | 0.00988 | 0.375433 | 88  | 1929   | 154.8  | 1698.7 | 48.92  | 1804.6 | 73.64 | 1922.3 | 789.78  | 1929.2 |
| 74325_60 | 0.07192 | 0.01349 | 0.0481  | 0.03964 | 1.4984  | 0.26757 | 0.15107 | 0.00968 | 0.358829 | 103 | 984    | 341.05 | 907    | 54.23  | 929.7  | 108.8 | 949.6  | 764.45  | 907    |
| 74325_61 | 0.09942 | 0.01216 | 0.00727 | 0.00365 | 0.22534 | 0.02624 | 0.01644 | 0.00072 | 0.376102 | 196 | 1613   | 211.99 | 105.1  | 4.58   | 206.3  | 21.74 | 146.4  | 73.23   | 105.1  |
| 74325_62 | 0.08318 | 0.01143 | 0.01288 | 0.0072  | 0.26416 | 0.03456 | 0.02304 | 0.00111 | 0.368242 | 162 | 1273   | 246.88 | 146.8  | 7.01   | 238    | 27.76 | 258.8  | 143.71  | 146.8  |
| 74325_63 | 0.08966 | 0.01662 | 0.03625 | 0.02918 | 1.19503 | 0.21063 | 0.09666 | 0.00612 | 0.359222 | 134 | 1418   | 318.27 | 594.8  | 35.97  | 798.3  | 97.43 | 719.6  | 569.19  | 594.8  |
| 74325_64 | 0.10739 | 0.00941 | 0.09051 | 0.03892 | 4.91831 | 0.4158  | 0.33218 | 0.01058 | 0.376742 | 105 | 1756   | 152.3  | 1848.9 | 51.19  | 1805.4 | 71.34 | 1751.3 | 721.41  | 1755.6 |
| 74325_65 | 0.06752 | 0.01016 | 0.01565 | 0.01041 | 0.40334 | 0.05869 | 0.04332 | 0.00235 | 0.372809 | 126 | 854    | 284.9  | 273.4  | 14.52  | 344.1  | 42.47 | 313.8  | 207.1   | 273.4  |
| 74325_66 | 0.05958 | 0.00965 | 0.01605 | 0.0113  | 0.35455 | 0.0539  | 0.04317 | 0.00234 | 0.356552 | 113 | 589    | 317.24 | 272.5  | 14.48  | 308.1  | 40.4  | 321.8  | 224.87  | 272.5  |
| 74325_67 | 0.04962 | 0.00994 | 0.0156  | 0.01261 | 0.32667 | 0.06261 | 0.04776 | 0.00327 | 0.357231 | 95  | 177    | 410.48 | 300.8  | 20.13  | 287    | 47.92 | 313    | 250.92  | 300.8  |
| 74325_68 | 0.07276 | 0.00814 | 0.02923 | 0.0148  | 0.95214 | 0.1009  | 0.09496 | 0.00375 | 0.372649 | 116 | 1007   | 211.62 | 584.8  | 22.07  | 679.2  | 52.48 | 582.4  | 290.65  | 584.8  |
| 74325_69 | 0.06589 | 0.00786 | 0.00658 | 0.00333 | 0.16533 | 0.01877 | 0.01821 | 0.00074 | 0.357939 | 134 | 803    | 231.84 | 116.3  | 4.71   | 155.4  | 16.35 | 132.6  | 66.92   | 116.3  |
| 74325_70 | 0.06049 | 0.00793 | 0.02801 | 0.01616 | 0.76542 | 0.09518 | 0.09186 | 0.00421 | 0.368561 | 102 | 621    | 260.18 | 566.6  | 24.84  | 577.1  | 54.74 | 558.4  | 317.74  | 566.6  |
| 74325_71 | 0.104   | 0.02389 | 0.10239 | 0.10086 | 5.42242 | 1.16287 | 0.37953 | 0.02983 | 0.366496 | 122 | 1697   | 372.48 | 2074.1 | 139.39 | 1888.4 | 183.9 | 1970.2 | 1849.27 | 1696.8 |
| 74325_72 | 0.05027 | 0.00605 | 0.00599 | 0.00309 | 0.13264 | 0.01521 | 0.01915 | 0.00079 | 0.359752 | 103 | 207    | 256.86 | 122.3  | 4.97   | 126.5  | 13.64 | 120.8  | 62.13   | 122.3  |
| 74325_73 | 0.06164 | 0.00682 | 0.03508 | 0.0179  | 0.84705 | 0.08912 | 0.09974 | 0.0039  | 0.371646 | 102 | 662    | 220.82 | 612.9  | 22.86  | 623    | 48.99 | 696.9  | 349.56  | 612.9  |
| 74325_74 | 0.10818 | 0.01582 | 0.09507 | 0.06298 | 5.02652 | 0.69915 | 0.33716 | 0.01714 | 0.365487 | 106 | 1769   | 245.69 | 1873   | 82.65  | 1823.8 | 117.8 | 1835.7 | 1162.44 | 1768.9 |
| 74325_76 | 0.05306 | 0.00683 | 0.01451 | 0.00793 | 0.33544 | 0.04111 | 0.04593 | 0.00208 | 0.369517 | 101 | 331    | 268.2  | 289.5  | 12.81  | 293.7  | 31.26 | 291.1  | 157.94  | 289.5  |
| 74325_77 | 0.07976 | 0.0085  | 0.06252 | 0.0308  | 2.41377 | 0.24519 | 0.21965 | 0.00833 | 0.373342 | 107 | 1191   | 197.06 | 1280   | 44.02  | 1246.7 | 72.93 | 1225.8 | 585.91  | 1191   |
| 74325_78 | 0.06551 | 0.00697 | 0.04095 | 0.02013 | 1.24022 | 0.12576 | 0.13746 | 0.00521 | 0.373781 | 99  | 791    | 208.62 | 830.3  | 29.52  | 819    | 57    | 811.1  | 390.81  | 830.3  |
| 74325_79 | 0.05163 | 0.00589 | 0.01266 | 0.00648 | 0.29232 | 0.03181 | 0.0411  | 0.00165 | 0.368924 | 100 | 269    | 242.08 | 259.6  | 10.22  | 260.4  | 24.99 | 254.3  | 129.32  | 259.6  |
| 74325_80 | 0.07632 | 0.00851 | 0.05489 | 0.02759 | 1.88247 | 0.20017 | 0.17918 | 0.00712 | 0.373697 | 96  | 1103   | 208.11 | 1062.5 | 38.95  | 1074.9 | 70.51 | 1080.1 | 528.64  | 1103.4 |
| 74326_01 | 0.08337 | 0.00225 | 0.02696 | 0.0133  | 2.48386 | 0.0675  | 0.21609 | 0.0036  | 0.613043 | 100 | 1277.7 | 51.95  | 1261.2 | 19.08  | 1267.3 | 19.67 | 537.7  | 261.81  | 1277.7 |

|                 |         |         |         |         |          |         |         |         |          |     |        |        |        |       |        |       |        |        |               |
|-----------------|---------|---------|---------|---------|----------|---------|---------|---------|----------|-----|--------|--------|--------|-------|--------|-------|--------|--------|---------------|
| <b>74326_02</b> | 0.20297 | 0.00393 | 0.14688 | 0.01334 | 14.45227 | 0.29365 | 0.51642 | 0.00832 | 0.792914 | 104 | 2850.2 | 31.2   | 2684   | 35.36 | 2779.9 | 19.3  | 2770   | 235.16 | <b>2850.2</b> |
| <b>74326_03</b> | 0.04839 | 0.00616 | 0.00811 | 0.00073 | 0.1551   | 0.01902 | 0.02325 | 0.0009  | 0.315661 | 99  | 118.2  | 275.66 | 148.2  | 5.67  | 146.4  | 16.72 | 163.2  | 14.61  | <b>148.2</b>  |
| <b>74326_04</b> | 0.17628 | 0.00464 | 0.15241 | 0.00715 | 12.66359 | 0.33077 | 0.52103 | 0.00989 | 0.726715 | 98  | 2618.1 | 43.15  | 2703.6 | 41.9  | 2655   | 24.58 | 2867.3 | 125.44 | <b>2618.1</b> |
| <b>74326_05</b> | 0.05368 | 0.00646 | 0.01027 | 0.00118 | 0.27138  | 0.03125 | 0.03667 | 0.00145 | 0.343388 | 105 | 357.5  | 251.24 | 232.1  | 9.01  | 243.8  | 24.96 | 206.6  | 23.52  | <b>232.1</b>  |
| <b>74326_06</b> | 0.05477 | 0.00166 | 0.02248 | 0.00116 | 0.51458  | 0.01558 | 0.06814 | 0.00109 | 0.528336 | 99  | 402.9  | 65.8   | 424.9  | 6.58  | 421.5  | 10.44 | 449.4  | 23.03  | <b>424.9</b>  |
| <b>74326_07</b> | 0.06272 | 0.00303 | 0.0385  | 0.00289 | 0.88949  | 0.04147 | 0.10286 | 0.00214 | 0.446246 | 102 | 698.6  | 99.55  | 631.2  | 12.5  | 646.1  | 22.28 | 763.5  | 56.2   | <b>631.2</b>  |
| <b>74326_08</b> | 0.05262 | 0.00271 | 0.01526 | 0.00094 | 0.33231  | 0.01658 | 0.04581 | 0.00093 | 0.406894 | 101 | 312.3  | 112.93 | 288.7  | 5.75  | 291.3  | 12.64 | 306.1  | 18.75  | <b>288.7</b>  |
| <b>74326_09</b> | 0.17772 | 0.00519 | 0.12477 | 0.00793 | 8.74701  | 0.24606 | 0.35696 | 0.00695 | 0.692124 | 117 | 2631.7 | 47.7   | 1967.7 | 33.02 | 2312   | 25.63 | 2376.5 | 142.44 | <b>2631.7</b> |
| <b>74326_10</b> | 0.10886 | 0.00193 | 0.08592 | 0.0048  | 4.22041  | 0.07943 | 0.28118 | 0.00391 | 0.73886  | 105 | 1780.4 | 31.97  | 1597.3 | 19.65 | 1678   | 15.45 | 1666.1 | 89.36  | <b>1780.4</b> |
| <b>74326_11</b> | 0.05236 | 0.00531 | 0.00426 | 0.00046 | 0.10999  | 0.0107  | 0.01524 | 0.0005  | 0.337252 | 109 | 301    | 215.84 | 97.5   | 3.18  | 106    | 9.78  | 85.9   | 9.18   | <b>97.5</b>   |
| <b>74326_12</b> | 0.05991 | 0.00199 | 0.02683 | 0.00177 | 0.705    | 0.02304 | 0.08535 | 0.00142 | 0.509086 | 103 | 600.2  | 70.49  | 528    | 8.41  | 541.8  | 13.72 | 535.1  | 34.78  | <b>528</b>    |
| <b>74326_13</b> | 0.05112 | 0.00571 | 0.00564 | 0.00058 | 0.11731  | 0.01259 | 0.01665 | 0.00058 | 0.324581 | 106 | 246    | 238.23 | 106.4  | 3.69  | 112.6  | 11.44 | 113.8  | 11.66  | <b>106.4</b>  |
| <b>74326_14</b> | 0.05901 | 0.00167 | 0.02546 | 0.00167 | 0.67022  | 0.01882 | 0.08237 | 0.00127 | 0.549076 | 102 | 567.6  | 60.6   | 510.3  | 7.56  | 520.8  | 11.44 | 508.1  | 32.92  | <b>510.3</b>  |
| <b>74326_15</b> | 0.04141 | 0.00932 | 0.00286 | 0.00065 | 0.08102  | 0.01776 | 0.01419 | 0.00077 | 0.247547 | 87  | 0.1    | 228.56 | 90.8   | 4.87  | 79.1   | 16.68 | 57.8   | 13.06  | <b>90.8</b>   |
| <b>74326_16</b> | 0.07934 | 0.00321 | 0.06066 | 0.0089  | 2.09258  | 0.08212 | 0.19128 | 0.00359 | 0.478253 | 102 | 1180.7 | 77.99  | 1128.3 | 19.44 | 1146.4 | 26.96 | 1190.3 | 169.53 | <b>1180.7</b> |
| <b>74326_17</b> | 0.05541 | 0.00316 | 0.01163 | 0.00177 | 0.27351  | 0.01503 | 0.0358  | 0.0008  | 0.40665  | 108 | 428.7  | 122.75 | 226.7  | 4.98  | 245.5  | 11.99 | 233.7  | 35.39  | <b>226.7</b>  |
| <b>74326_18</b> | 0.06205 | 0.00515 | 0.01245 | 0.00209 | 0.33094  | 0.02619 | 0.03868 | 0.00117 | 0.38222  | 119 | 675.8  | 168.04 | 244.7  | 7.24  | 290.3  | 19.98 | 250.2  | 41.68  | <b>244.7</b>  |
| <b>74326_19</b> | 0.06262 | 0.00306 | 0.04254 | 0.00672 | 1.02947  | 0.04879 | 0.11924 | 0.00249 | 0.440616 | 99  | 695.3  | 100.98 | 726.2  | 14.33 | 718.7  | 24.41 | 842.1  | 130.28 | <b>726.2</b>  |
| <b>74326_20</b> | 0.05111 | 0.00288 | 0.01603 | 0.00259 | 0.30038  | 0.01638 | 0.04262 | 0.00094 | 0.404456 | 99  | 245.9  | 124.63 | 269.1  | 5.81  | 266.7  | 12.79 | 321.3  | 51.61  | <b>269.1</b>  |
| <b>74326_21</b> | 0.15763 | 0.00716 | 0.065   | 0.01085 | 4.05079  | 0.17707 | 0.18638 | 0.00407 | 0.499563 | 149 | 2430.4 | 75.04  | 1101.7 | 22.11 | 1644.5 | 35.6  | 1272.9 | 205.86 | <b>2430.4</b> |
| <b>74326_22</b> | 0.05729 | 0.00318 | 0.03152 | 0.00552 | 0.6555   | 0.03528 | 0.08299 | 0.00186 | 0.41642  | 100 | 502.1  | 118.25 | 513.9  | 11.09 | 511.9  | 21.64 | 627.2  | 108.18 | <b>513.9</b>  |
| <b>74326_23</b> | 0.06215 | 0.00322 | 0.03596 | 0.00629 | 0.83494  | 0.04208 | 0.09744 | 0.00212 | 0.431696 | 103 | 679.3  | 107.01 | 599.4  | 12.45 | 616.3  | 23.28 | 714.1  | 122.81 | <b>599.4</b>  |
| <b>74326_24</b> | 0.05941 | 0.00274 | 0.04137 | 0.00729 | 0.8692   | 0.03932 | 0.10612 | 0.00215 | 0.447865 | 98  | 582    | 97.05  | 650.2  | 12.51 | 635.1  | 21.36 | 819.3  | 141.52 | <b>650.2</b>  |
| <b>74326_25</b> | 0.07371 | 0.0032  | 0.05017 | 0.00883 | 1.51349  | 0.0649  | 0.14893 | 0.00293 | 0.458797 | 105 | 1033.4 | 85.35  | 895    | 16.46 | 935.8  | 26.22 | 989.5  | 170    | <b>895</b>    |
| <b>74326_26</b> | 0.06248 | 0.00344 | 0.02927 | 0.00538 | 0.78009  | 0.04193 | 0.09055 | 0.00207 | 0.425306 | 105 | 690.6  | 113.16 | 558.8  | 12.21 | 585.5  | 23.92 | 583.1  | 105.7  | <b>558.8</b>  |
| <b>74326_27</b> | 0.05634 | 0.00286 | 0.03067 | 0.00551 | 0.70577  | 0.03515 | 0.09086 | 0.00194 | 0.428713 | 97  | 465    | 109.42 | 560.6  | 11.49 | 542.2  | 20.92 | 610.5  | 108.02 | <b>560.6</b>  |
| <b>74326_28</b> | 0.07381 | 0.00439 | 0.05013 | 0.01026 | 1.42446  | 0.08235 | 0.13998 | 0.00349 | 0.431267 | 106 | 1036.3 | 115.7  | 844.5  | 19.72 | 899.2  | 34.49 | 988.6  | 197.45 | <b>844.5</b>  |
| <b>74326_29</b> | 0.05553 | 0.0036  | 0.00794 | 0.00153 | 0.18966  | 0.012   | 0.02477 | 0.00062 | 0.395604 | 112 | 433.5  | 138.71 | 157.7  | 3.87  | 176.3  | 10.24 | 159.8  | 30.66  | <b>157.7</b>  |
| <b>74326_30</b> | 0.05885 | 0.00334 | 0.01837 | 0.0036  | 0.40708  | 0.02269 | 0.05017 | 0.00117 | 0.418396 | 110 | 561.5  | 119.12 | 315.6  | 7.16  | 346.8  | 16.37 | 368    | 71.51  | <b>315.6</b>  |
| <b>74326_31</b> | 0.04734 | 0.0033  | 0.00435 | 0.00043 | 0.09999  | 0.00674 | 0.01532 | 0.00037 | 0.697472 | 99  | 65.9   | 158.53 | 98     | 2.37  | 96.8   | 6.22  | 87.7   | 8.58   | <b>98</b>     |
| <b>74326_32</b> | 0.06052 | 0.00169 | 0.03021 | 0.00184 | 0.79195  | 0.02238 | 0.09492 | 0.00155 | 0.592254 | 101 | 622.2  | 59.06  | 584.6  | 9.1   | 592.3  | 12.68 | 601.6  | 36.18  | <b>584.6</b>  |
| <b>74326_33</b> | 0.06346 | 0.00725 | 0.00529 | 0.00057 | 0.12898  | 0.01397 | 0.01474 | 0.0006  | 0.358294 | 131 | 723.5  | 225.35 | 94.4   | 3.79  | 123.2  | 12.56 | 106.7  | 11.46  | <b>94.4</b>   |
| <b>74326_34</b> | 0.05364 | 0.00213 | 0.01919 | 0.00133 | 0.42283  | 0.01654 | 0.05718 | 0.00105 | 0.577845 | 100 | 355.8  | 87.07  | 358.5  | 6.39  | 358.1  | 11.8  | 384.2  | 26.47  | <b>358.5</b>  |

|                 |         |         |         |         |         |         |         |         |          |     |        |        |        |       |        |       |        |        |               |
|-----------------|---------|---------|---------|---------|---------|---------|---------|---------|----------|-----|--------|--------|--------|-------|--------|-------|--------|--------|---------------|
| <b>74326_35</b> | 0.04842 | 0.00311 | 0.0103  | 0.00074 | 0.2081  | 0.01294 | 0.03118 | 0.00072 | 0.37582  | 97  | 119.7  | 144.59 | 197.9  | 4.52  | 192    | 10.88 | 207    | 14.83  | <b>197.9</b>  |
| <b>74326_36</b> | 0.05367 | 0.00527 | 0.00898 | 0.00083 | 0.18701 | 0.01763 | 0.02527 | 0.00083 | 0.469435 | 108 | 357.2  | 207.77 | 160.9  | 5.19  | 174.1  | 15.08 | 180.6  | 16.7   | <b>160.9</b>  |
| <b>74326_37</b> | 0.05123 | 0.00903 | 0.00302 | 0.00056 | 0.09725 | 0.01648 | 0.01377 | 0.00071 | 0.371359 | 107 | 251.1  | 361.8  | 88.2   | 4.54  | 94.2   | 15.25 | 61     | 11.38  | <b>88.2</b>   |
| <b>74326_38</b> | 0.05382 | 0.00235 | 0.0159  | 0.00121 | 0.35664 | 0.01522 | 0.04806 | 0.00092 | 0.348406 | 102 | 363.5  | 95.23  | 302.6  | 5.67  | 309.7  | 11.39 | 318.9  | 23.99  | <b>302.6</b>  |
| <b>74326_39</b> | 0.0516  | 0.00222 | 0.0137  | 0.0011  | 0.29572 | 0.01245 | 0.04157 | 0.00078 | 0.304268 | 100 | 267.8  | 95.51  | 262.5  | 4.86  | 263    | 9.75  | 274.9  | 21.91  | <b>262.5</b>  |
| <b>74326_40</b> | 0.05245 | 0.00356 | 0.0139  | 0.00131 | 0.30243 | 0.01982 | 0.04183 | 0.00104 | 0.448559 | 102 | 304.9  | 147.48 | 264.2  | 6.43  | 268.3  | 15.45 | 279    | 26.05  | <b>264.2</b>  |
| <b>74326_41</b> | 0.053   | 0.00194 | 0.01358 | 0.00112 | 0.27886 | 0.01006 | 0.03817 | 0.00067 | 0.445683 | 103 | 328.5  | 80.84  | 241.5  | 4.18  | 249.8  | 7.99  | 272.6  | 22.27  | <b>241.5</b>  |
| <b>74326_42</b> | 0.05961 | 0.0022  | 0.02986 | 0.00257 | 0.75339 | 0.02742 | 0.09168 | 0.00165 | 0.379373 | 101 | 589.3  | 78.13  | 565.5  | 9.77  | 570.2  | 15.88 | 594.8  | 50.39  | <b>565.5</b>  |
| <b>74326_43</b> | 0.05406 | 0.00201 | 0.01331 | 0.00124 | 0.28594 | 0.01048 | 0.03837 | 0.00068 | 0.486565 | 105 | 373.5  | 81.43  | 242.7  | 4.25  | 255.4  | 8.28  | 267.3  | 24.69  | <b>242.7</b>  |
| <b>74326_44</b> | 0.06166 | 0.00266 | 0.03268 | 0.00303 | 0.90336 | 0.03804 | 0.10627 | 0.0021  | 0.494495 | 100 | 662.3  | 89.99  | 651.1  | 12.24 | 653.5  | 20.29 | 649.9  | 59.35  | <b>651.1</b>  |
| <b>74326_45</b> | 0.05778 | 0.00227 | 0.02556 | 0.00283 | 0.64737 | 0.02495 | 0.08127 | 0.00151 | 0.483538 | 101 | 521.3  | 84.21  | 503.7  | 8.99  | 506.9  | 15.38 | 510.2  | 55.68  | <b>503.7</b>  |
| <b>74326_46</b> | 0.06775 | 0.00275 | 0.04575 | 0.00716 | 1.18781 | 0.04751 | 0.12716 | 0.00245 | 0.481701 | 103 | 861    | 82.09  | 771.7  | 14.01 | 794.9  | 22.05 | 904.1  | 138.4  | <b>771.7</b>  |
| <b>74326_47</b> | 0.05335 | 0.00482 | 0.01371 | 0.00232 | 0.26748 | 0.02317 | 0.03637 | 0.00114 | 0.361849 | 105 | 343.5  | 191.9  | 230.3  | 7.12  | 240.7  | 18.56 | 275.2  | 46.35  | <b>230.3</b>  |
| <b>74326_48</b> | 0.05364 | 0.00563 | 0.00797 | 0.00133 | 0.16185 | 0.01627 | 0.02188 | 0.00077 | 0.350081 | 109 | 356    | 221.24 | 139.6  | 4.88  | 152.3  | 14.22 | 160.4  | 26.67  | <b>139.6</b>  |
| <b>74326_49</b> | 0.0922  | 0.00415 | 0.03968 | 0.0063  | 1.53949 | 0.06715 | 0.12112 | 0.00254 | 0.480783 | 128 | 1471.4 | 83.29  | 737    | 14.63 | 946.3  | 26.85 | 786.5  | 122.57 | <b>737</b>    |
| <b>74326_50</b> | 0.06002 | 0.00242 | 0.03218 | 0.00535 | 0.71944 | 0.02847 | 0.08695 | 0.00164 | 0.47663  | 102 | 604.3  | 85.03  | 537.5  | 9.75  | 550.3  | 16.81 | 640.1  | 104.74 | <b>537.5</b>  |
| <b>74326_51</b> | 0.17521 | 0.00786 | 0.14415 | 0.02581 | 10.7344 | 0.46284 | 0.44439 | 0.01027 | 0.535986 | 105 | 2608.1 | 72.79  | 2370.3 | 45.81 | 2500.4 | 40.05 | 2721.8 | 455.99 | <b>2608.1</b> |
| <b>74326_52</b> | 0.05655 | 0.00412 | 0.00609 | 0.00107 | 0.13214 | 0.00923 | 0.01695 | 0.00045 | 0.38008  | 116 | 473.2  | 154.17 | 108.4  | 2.85  | 126    | 8.28  | 122.7  | 21.4   | <b>108.4</b>  |
| <b>74326_53</b> | 0.06159 | 0.0032  | 0.03207 | 0.00552 | 0.76827 | 0.03851 | 0.09048 | 0.00198 | 0.436569 | 104 | 659.9  | 107.68 | 558.4  | 11.69 | 578.8  | 22.11 | 638    | 108.07 | <b>558.4</b>  |
| <b>74326_54</b> | 0.06549 | 0.00481 | 0.02859 | 0.00511 | 0.74553 | 0.05215 | 0.08258 | 0.00235 | 0.406821 | 111 | 790.1  | 146.9  | 511.5  | 14    | 565.6  | 30.34 | 569.8  | 100.4  | <b>511.5</b>  |
| <b>74326_55</b> | 0.06028 | 0.00257 | 0.02563 | 0.00554 | 0.71348 | 0.02942 | 0.08585 | 0.00165 | 0.466104 | 103 | 613.8  | 89.42  | 530.9  | 9.82  | 546.8  | 17.44 | 511.5  | 109.16 | <b>530.9</b>  |
| <b>74326_56</b> | 0.11978 | 0.00513 | 0.10249 | 0.01906 | 4.75236 | 0.19604 | 0.28778 | 0.00572 | 0.481837 | 109 | 1953   | 74.56  | 1630.4 | 28.64 | 1776.5 | 34.6  | 1972.1 | 349.47 | <b>1953</b>   |
| <b>74326_57</b> | 0.05708 | 0.00326 | 0.03426 | 0.0067  | 0.63978 | 0.03502 | 0.08131 | 0.00186 | 0.417911 | 100 | 493.9  | 121.76 | 503.9  | 11.11 | 502.2  | 21.68 | 680.9  | 130.91 | <b>503.9</b>  |
| <b>74326_58</b> | 0.0628  | 0.00307 | 0.03426 | 0.00663 | 0.75833 | 0.03551 | 0.08758 | 0.00183 | 0.446225 | 106 | 701.6  | 100.72 | 541.2  | 10.83 | 573    | 20.5  | 680.9  | 129.63 | <b>541.2</b>  |
| <b>74326_59</b> | 0.06454 | 0.00308 | 0.03739 | 0.00744 | 0.86308 | 0.03942 | 0.09699 | 0.00199 | 0.449222 | 106 | 759.5  | 97.57  | 596.8  | 11.72 | 631.8  | 21.49 | 742    | 144.98 | <b>596.8</b>  |
| <b>74326_60</b> | 0.05108 | 0.00242 | 0.01786 | 0.00366 | 0.31929 | 0.01449 | 0.04533 | 0.00091 | 0.442357 | 98  | 244.6  | 105.6  | 285.8  | 5.62  | 281.4  | 11.15 | 357.7  | 72.68  | <b>285.8</b>  |
| <b>74326_61</b> | 0.10577 | 0.00297 | 0.09291 | 0.00576 | 4.25188 | 0.11957 | 0.29158 | 0.00523 | 0.637827 | 102 | 1727.8 | 50.68  | 1649.4 | 26.09 | 1684.1 | 23.12 | 1795.7 | 106.43 | <b>1727.8</b> |
| <b>74326_62</b> | 0.04837 | 0.00374 | 0.00795 | 0.00068 | 0.17023 | 0.01269 | 0.02553 | 0.00068 | 0.3573   | 98  | 117.5  | 172.61 | 162.5  | 4.27  | 159.6  | 11.01 | 160.1  | 13.68  | <b>162.5</b>  |
| <b>74326_63</b> | 0.09411 | 0.00401 | 0.04106 | 0.00324 | 2.10708 | 0.08613 | 0.1624  | 0.00356 | 0.536279 | 119 | 1510.4 | 78.37  | 970.1  | 19.76 | 1151.1 | 28.15 | 813.4  | 62.88  | <b>970.1</b>  |
| <b>74326_64</b> | 0.06381 | 0.0017  | 0.03593 | 0.00257 | 0.78794 | 0.0213  | 0.08956 | 0.00145 | 0.598918 | 107 | 735.5  | 55.29  | 552.9  | 8.56  | 590    | 12.1  | 713.4  | 50.09  | <b>552.9</b>  |
| <b>74326_65</b> | 0.1449  | 0.00382 | 0.10886 | 0.00806 | 6.90759 | 0.18242 | 0.34578 | 0.00612 | 0.670202 | 110 | 2286.6 | 44.63  | 1914.4 | 29.29 | 2099.6 | 23.42 | 2088.6 | 146.92 | <b>2286.6</b> |
| <b>74326_66</b> | 0.06537 | 0.00143 | 0.03653 | 0.00278 | 1.01112 | 0.02315 | 0.11219 | 0.00171 | 0.665723 | 104 | 786.4  | 45.24  | 685.4  | 9.9   | 709.4  | 11.69 | 725.1  | 54.24  | <b>685.4</b>  |
| <b>74326_67</b> | 0.05151 | 0.00231 | 0.02113 | 0.00187 | 0.42094 | 0.01843 | 0.05928 | 0.00115 | 0.443082 | 96  | 263.6  | 99.53  | 371.2  | 6.99  | 356.7  | 13.17 | 422.6  | 36.98  | <b>371.2</b>  |

|                 |         |         |         |         |         |         |         |         |          |     |        |        |        |       |        |       |        |        |               |
|-----------------|---------|---------|---------|---------|---------|---------|---------|---------|----------|-----|--------|--------|--------|-------|--------|-------|--------|--------|---------------|
| <b>74326_68</b> | 0.06534 | 0.0024  | 0.03226 | 0.00288 | 0.88964 | 0.03204 | 0.09877 | 0.00181 | 0.508833 | 106 | 785.1  | 75.19  | 607.2  | 10.63 | 646.2  | 17.22 | 641.7  | 56.44  | <b>607.2</b>  |
| <b>74326_69</b> | 0.06639 | 0.00347 | 0.03135 | 0.00295 | 0.84767 | 0.0426  | 0.09261 | 0.00209 | 0.449061 | 109 | 818.7  | 105.47 | 571    | 12.34 | 623.4  | 23.41 | 623.9  | 57.86  | <b>571</b>    |
| <b>74326_70</b> | 0.07498 | 0.00256 | 0.04463 | 0.00454 | 1.40619 | 0.04717 | 0.13603 | 0.00245 | 0.53692  | 108 | 1068   | 67.11  | 822.2  | 13.91 | 891.6  | 19.91 | 882.5  | 87.92  | <b>822.2</b>  |
| <b>74326_71</b> | 0.05198 | 0.00333 | 0.01289 | 0.00108 | 0.27496 | 0.01709 | 0.03838 | 0.00086 | 0.360513 | 102 | 284.4  | 139.99 | 242.8  | 5.33  | 246.7  | 13.61 | 258.9  | 21.59  | <b>242.8</b>  |
| <b>74326_72</b> | 0.06797 | 0.00166 | 0.03831 | 0.00325 | 1.18162 | 0.02942 | 0.12612 | 0.00192 | 0.611438 | 103 | 867.8  | 49.95  | 765.7  | 10.97 | 792.1  | 13.7  | 759.8  | 63.27  | <b>765.7</b>  |
| <b>74326_73</b> | 0.0547  | 0.00311 | 0.01401 | 0.00134 | 0.32286 | 0.01777 | 0.04282 | 0.00093 | 0.394605 | 105 | 400.1  | 122.33 | 270.3  | 5.73  | 284.1  | 13.64 | 281.3  | 26.65  | <b>270.3</b>  |
| <b>74326_74</b> | 0.05341 | 0.00302 | 0.00499 | 0.0005  | 0.10685 | 0.00584 | 0.01451 | 0.00031 | 0.390891 | 111 | 346.2  | 122.27 | 92.9   | 1.96  | 103.1  | 5.36  | 100.7  | 9.99   | <b>92.9</b>   |
| <b>74326_75</b> | 0.1541  | 0.00368 | 0.10799 | 0.01017 | 8.02677 | 0.19479 | 0.37793 | 0.00567 | 0.618224 | 108 | 2391.9 | 40.08  | 2066.6 | 26.51 | 2234   | 21.91 | 2072.7 | 185.44 | <b>2391.9</b> |
| <b>74326_76</b> | 0.0586  | 0.00281 | 0.01675 | 0.00174 | 0.39311 | 0.0182  | 0.04867 | 0.00098 | 0.434918 | 110 | 552.3  | 101.29 | 306.4  | 6.01  | 336.6  | 13.26 | 335.8  | 34.58  | <b>306.4</b>  |
| <b>74326_77</b> | 0.12542 | 0.00339 | 0.09448 | 0.00991 | 5.77009 | 0.15535 | 0.33377 | 0.0052  | 0.578665 | 105 | 2034.8 | 47     | 1856.7 | 25.11 | 1941.9 | 23.3  | 1824.8 | 182.93 | <b>2034.8</b> |
| <b>74326_78</b> | 0.05341 | 0.00379 | 0.01314 | 0.00166 | 0.28413 | 0.01943 | 0.0386  | 0.00097 | 0.367476 | 104 | 346    | 152.74 | 244.1  | 6     | 253.9  | 15.36 | 263.9  | 33.02  | <b>244.1</b>  |
| <b>74326_79</b> | 0.06614 | 0.00213 | 0.04011 | 0.00469 | 1.21085 | 0.03827 | 0.13281 | 0.00219 | 0.521729 | 100 | 810.9  | 66.08  | 803.9  | 12.45 | 805.6  | 17.58 | 794.8  | 91.21  | <b>803.9</b>  |
| <b>74326_80</b> | 0.05839 | 0.01298 | 0.00376 | 0.00062 | 0.12711 | 0.02726 | 0.01579 | 0.00096 | 0.283493 | 120 | 544.5  | 423.65 | 101    | 6.12  | 121.5  | 24.56 | 75.8   | 12.51  | <b>101</b>    |

# 74317

*n* = 64/80, 90-100% Concordant

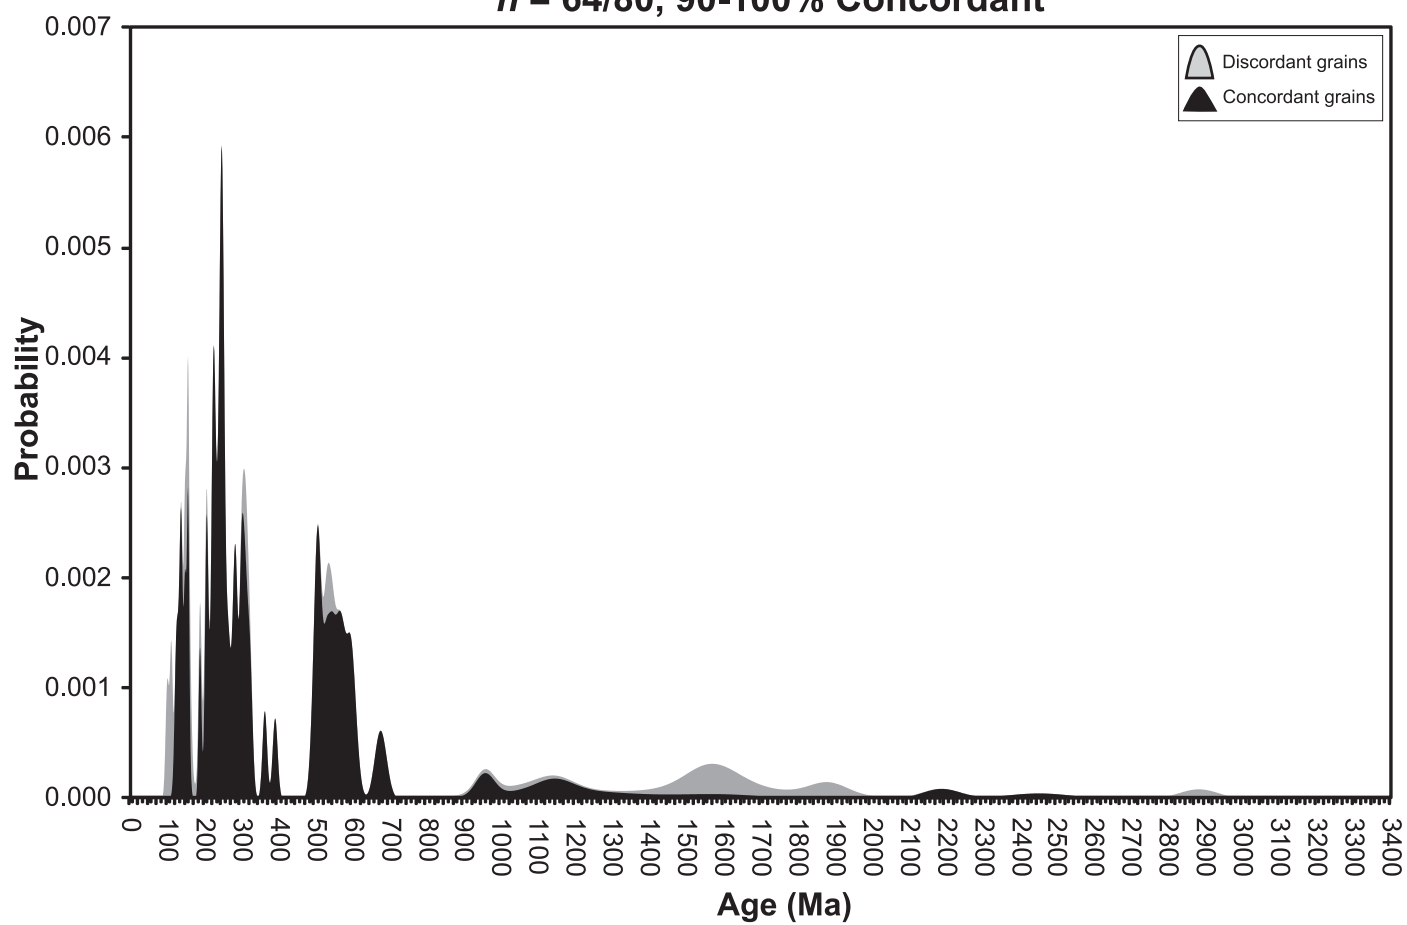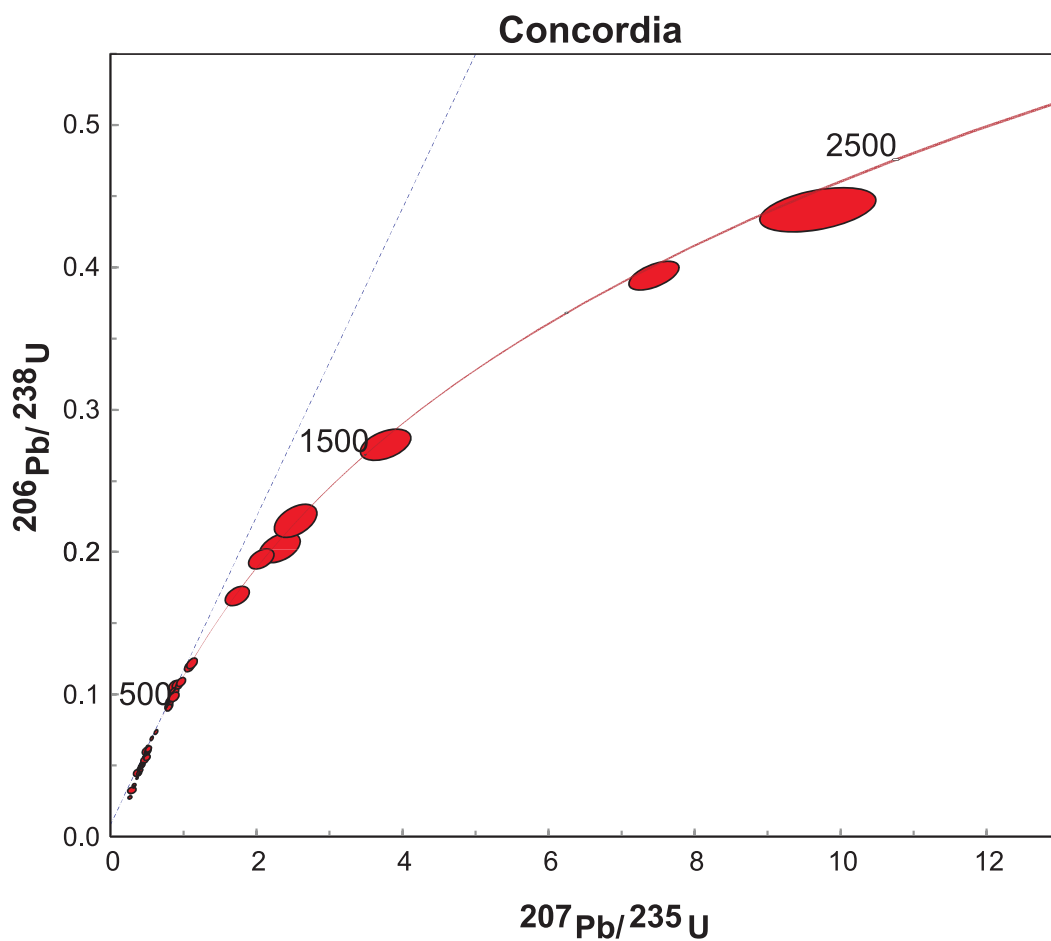

# 74318

$n = 56/79$ , 90-100% Concordant

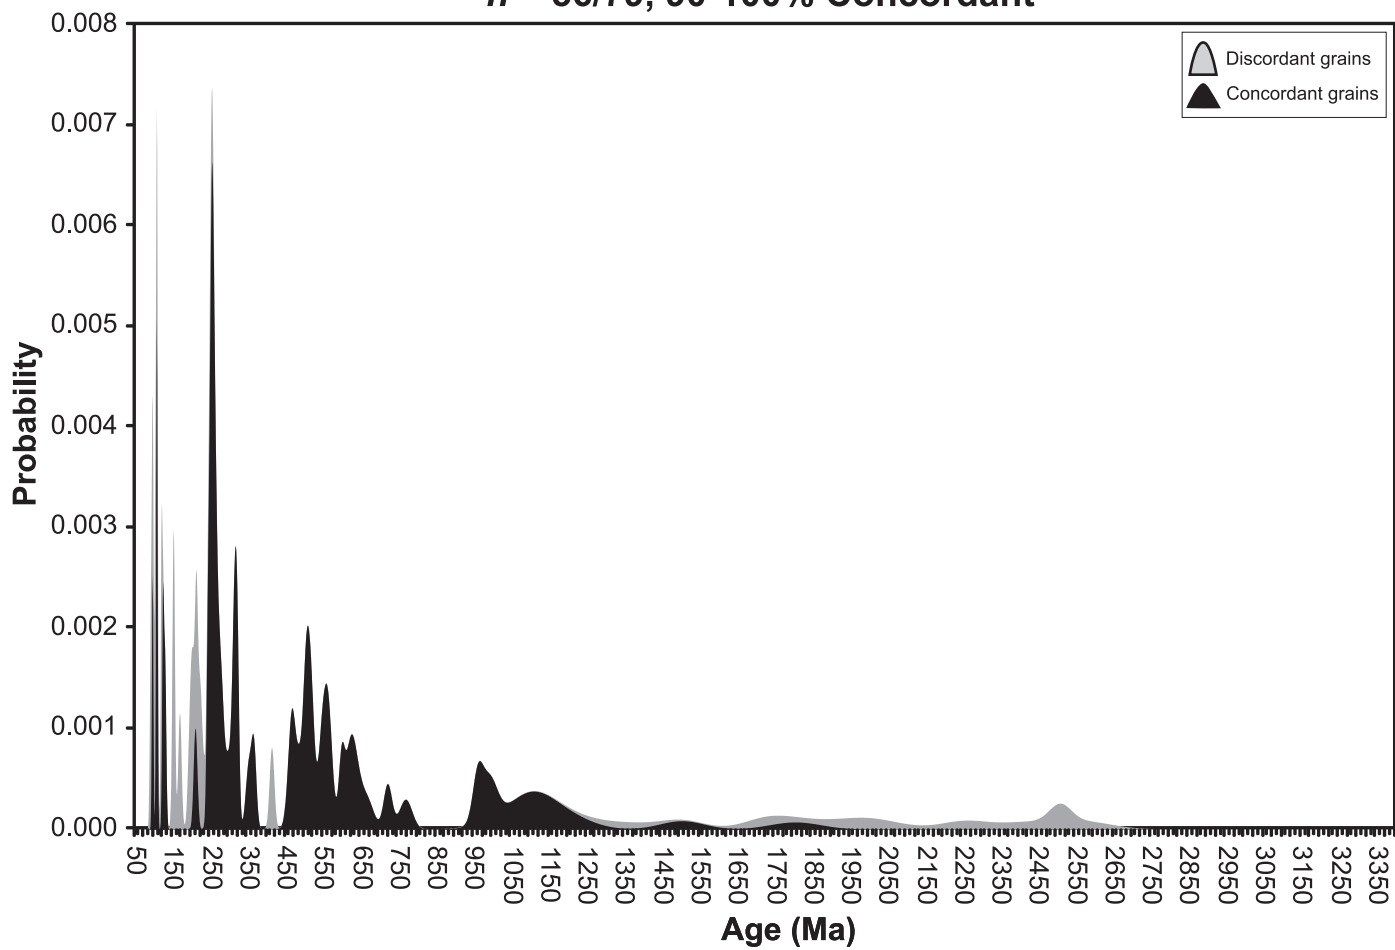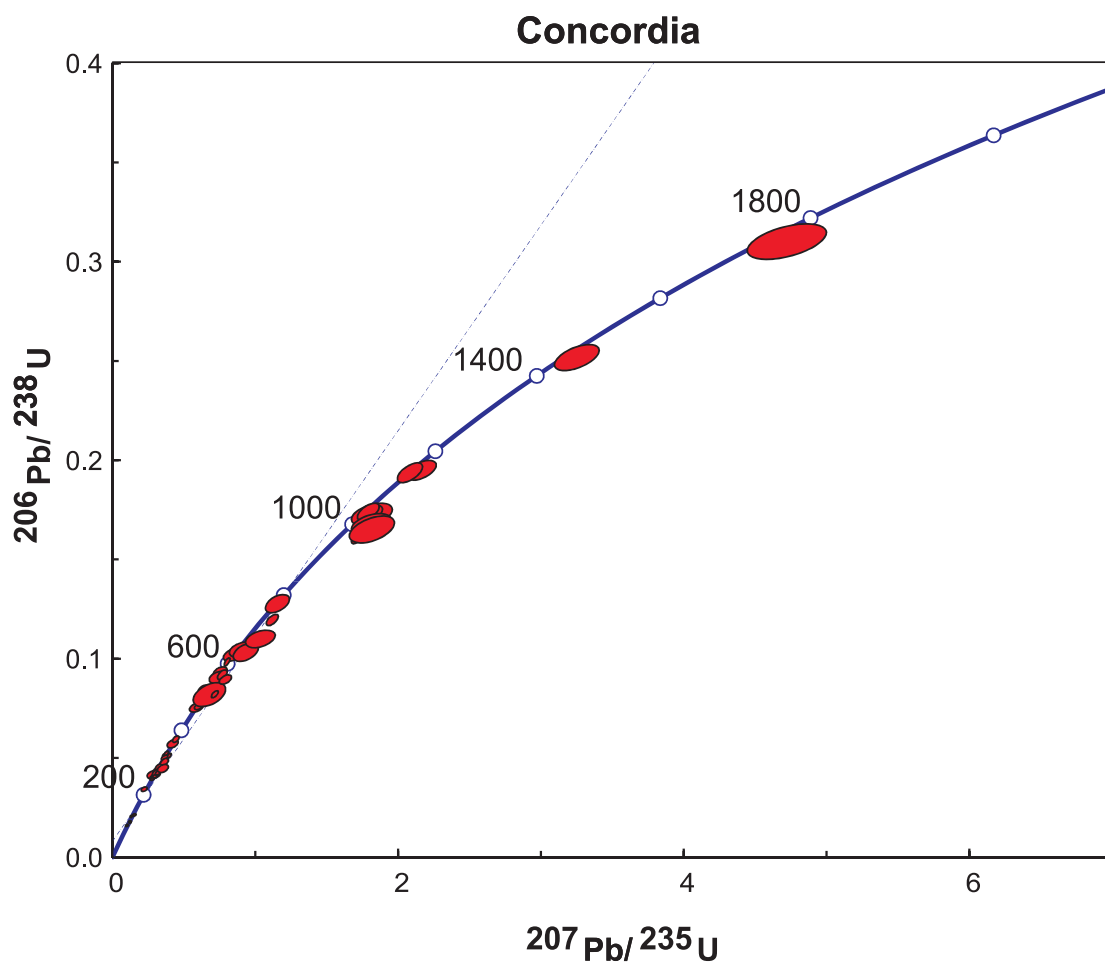

# 74319

$n = 58/80$ , 90-100% Concordant

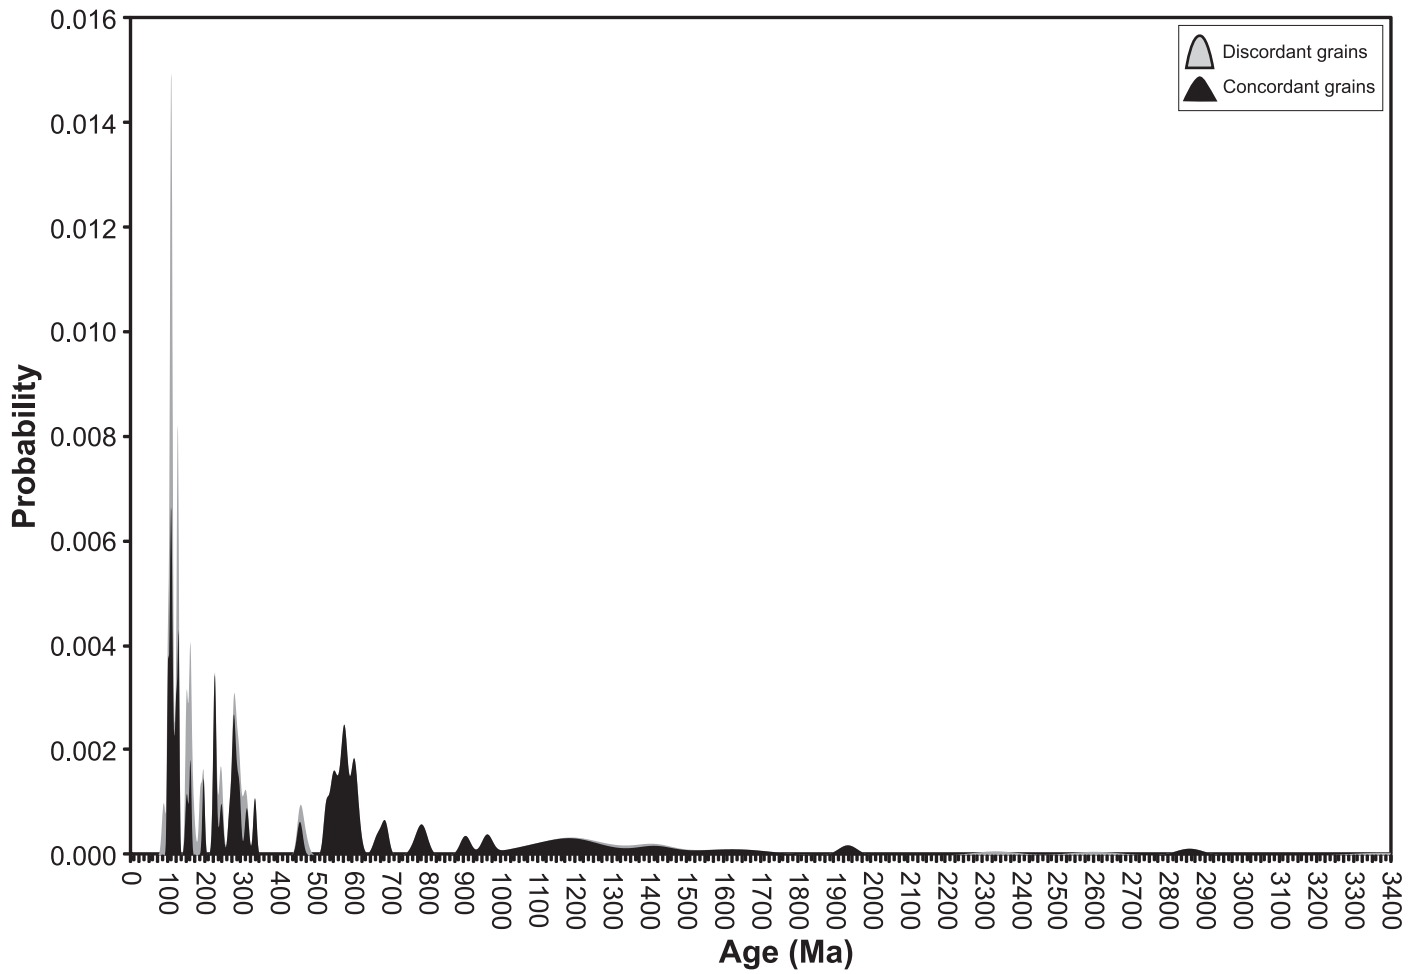

## Concordia

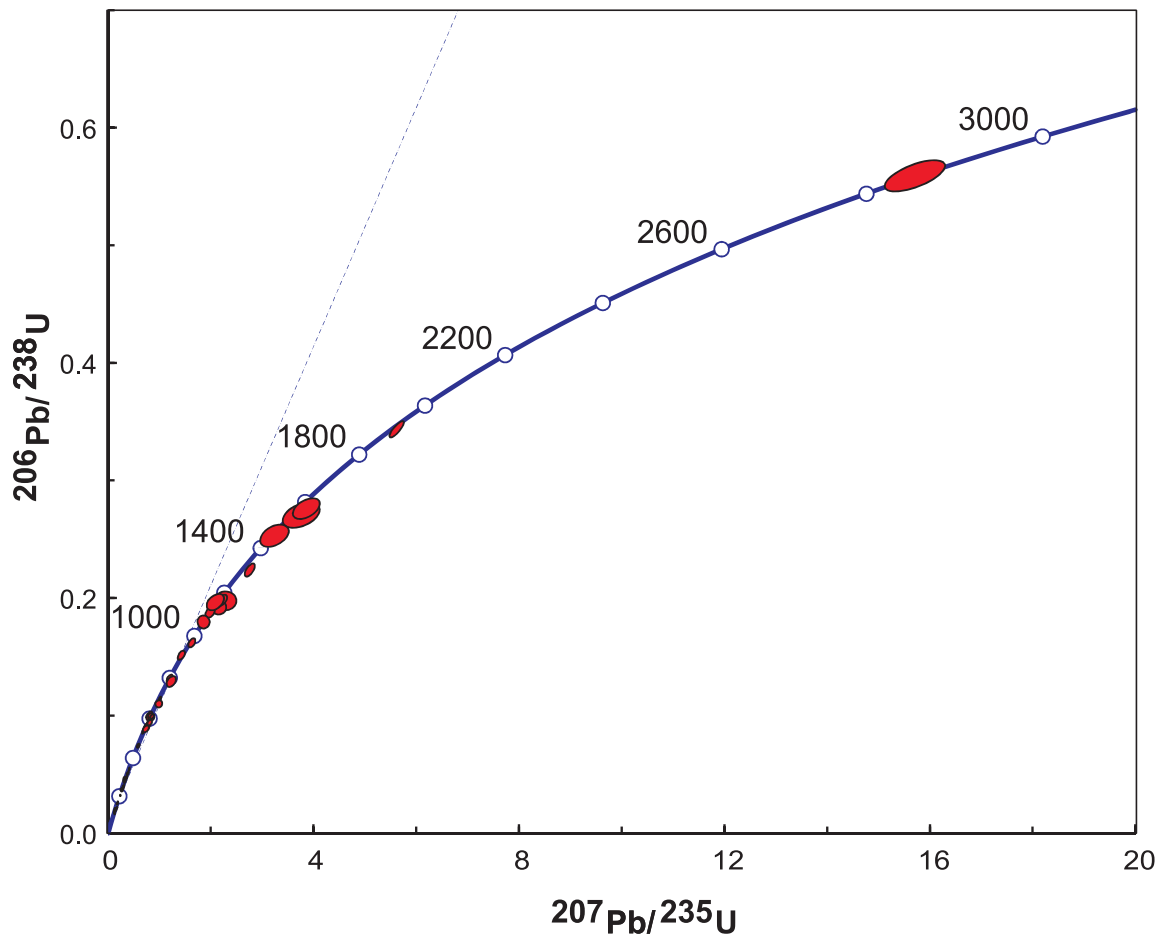



# 74320

$n = 41/78$ , 90-100% Concordant

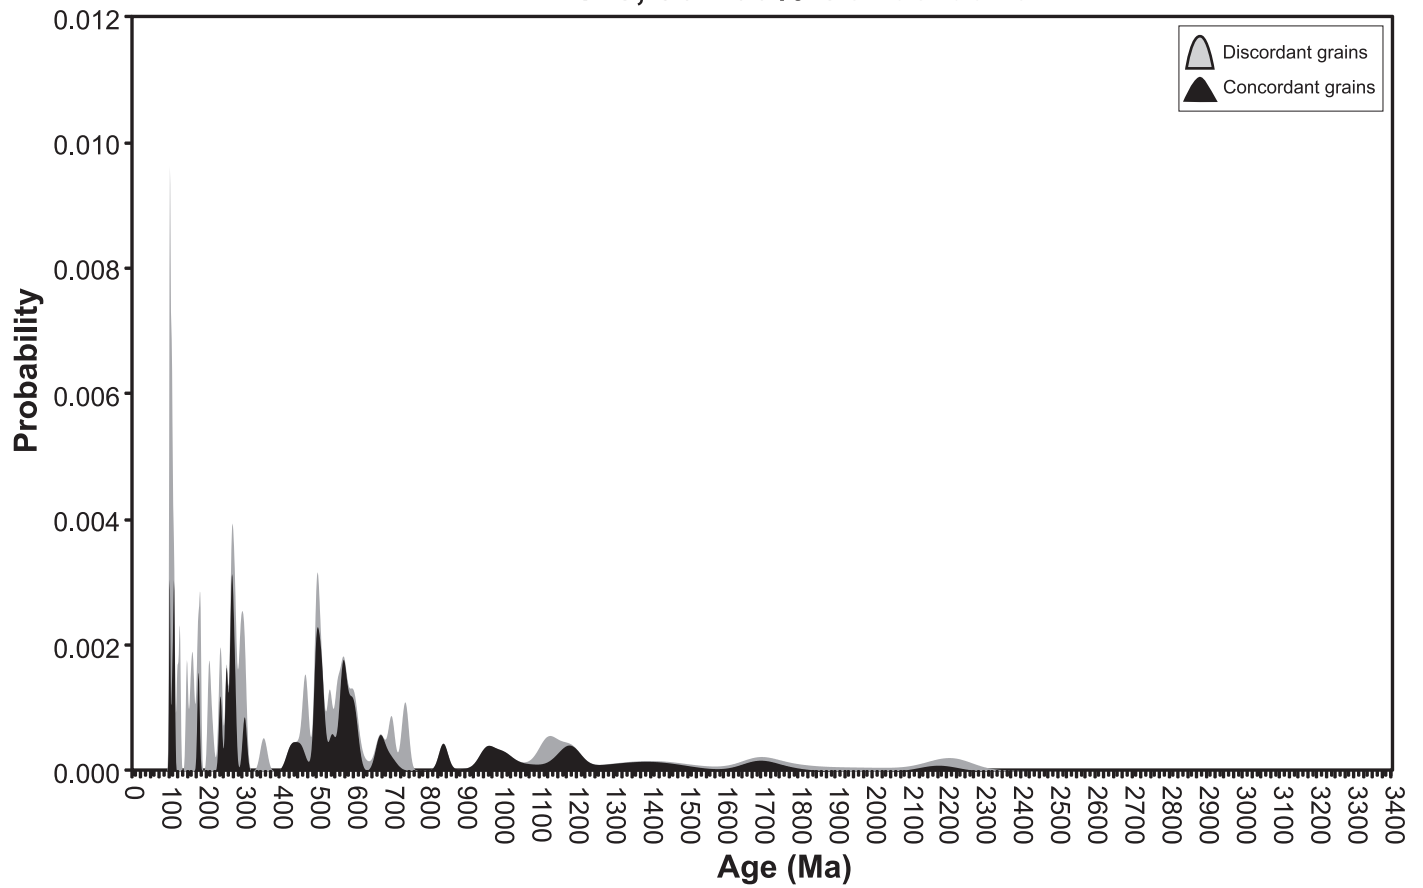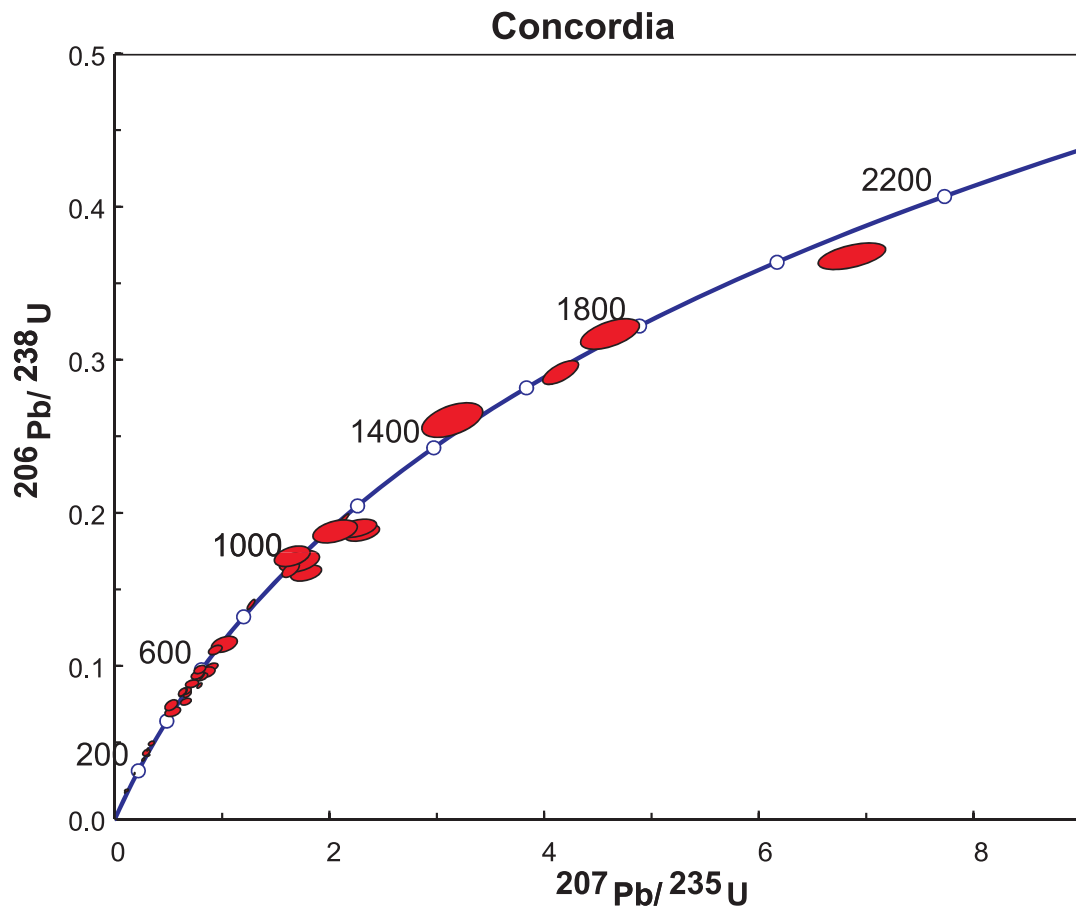

# 74321

$n = 49/79$ , 90-100% Concordant

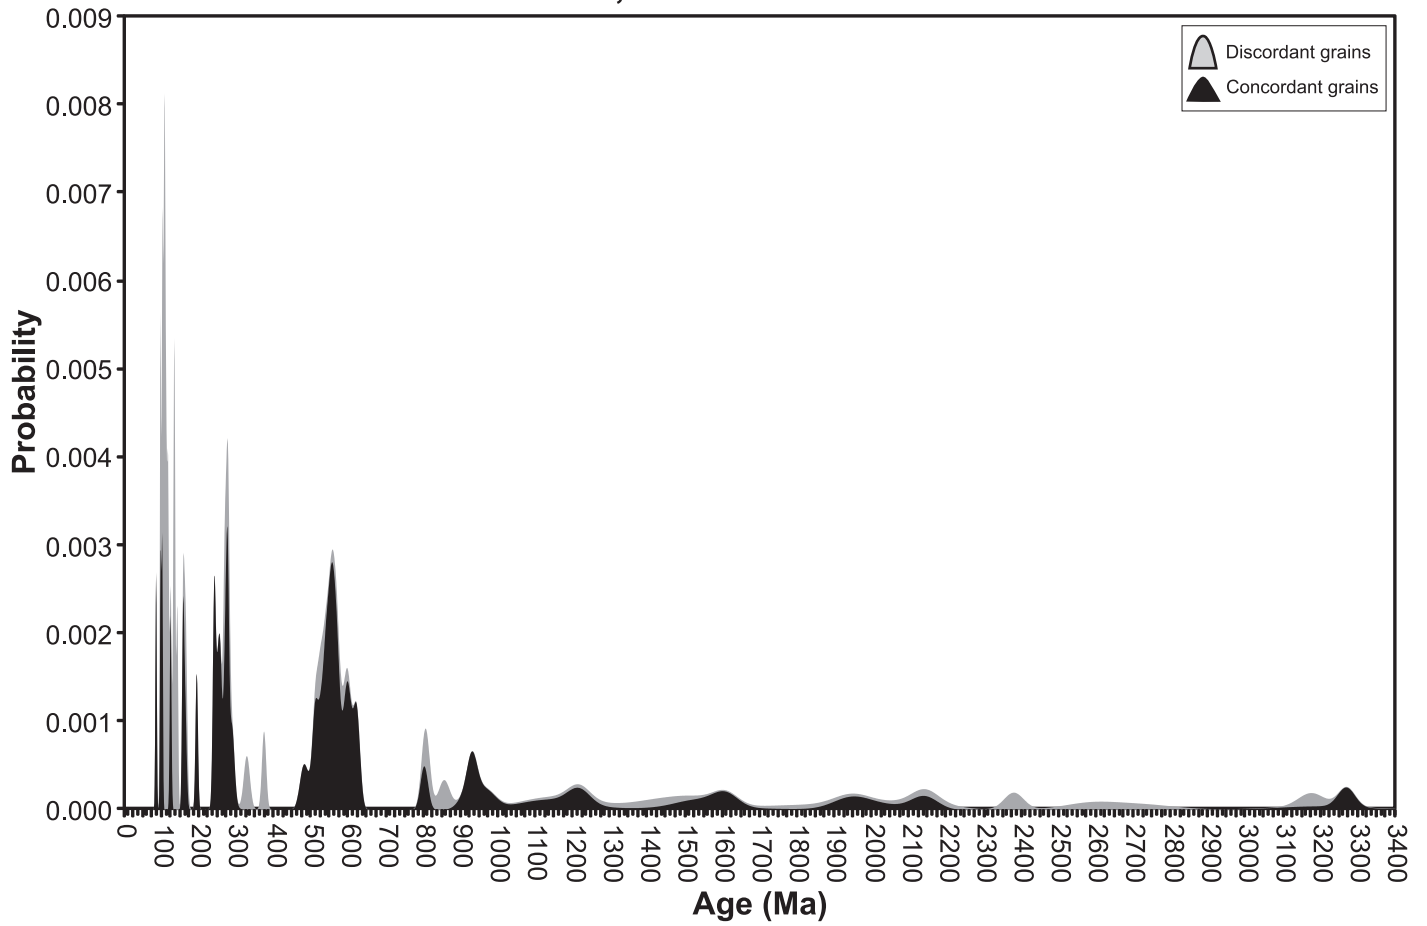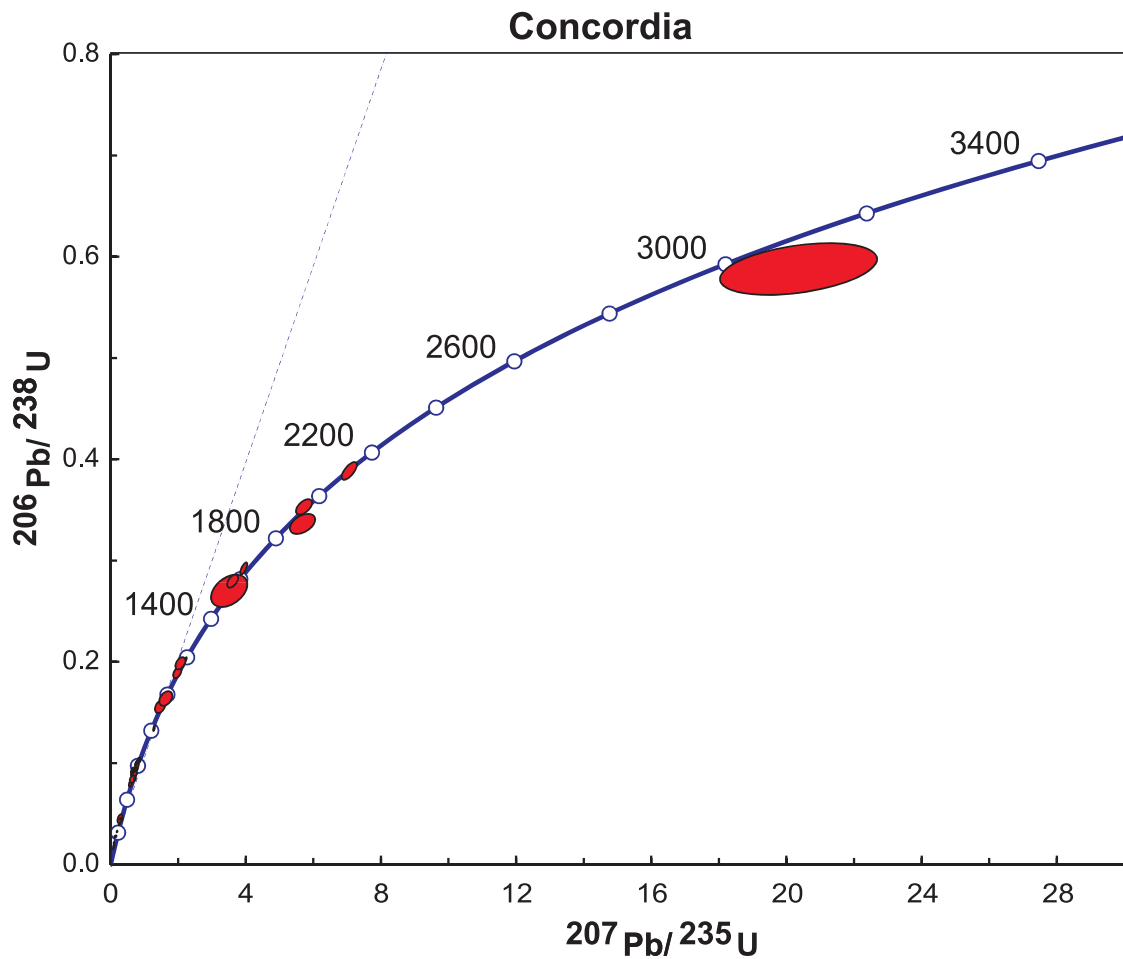

# 74322

*n* = 62/80, 90-100% Concordant

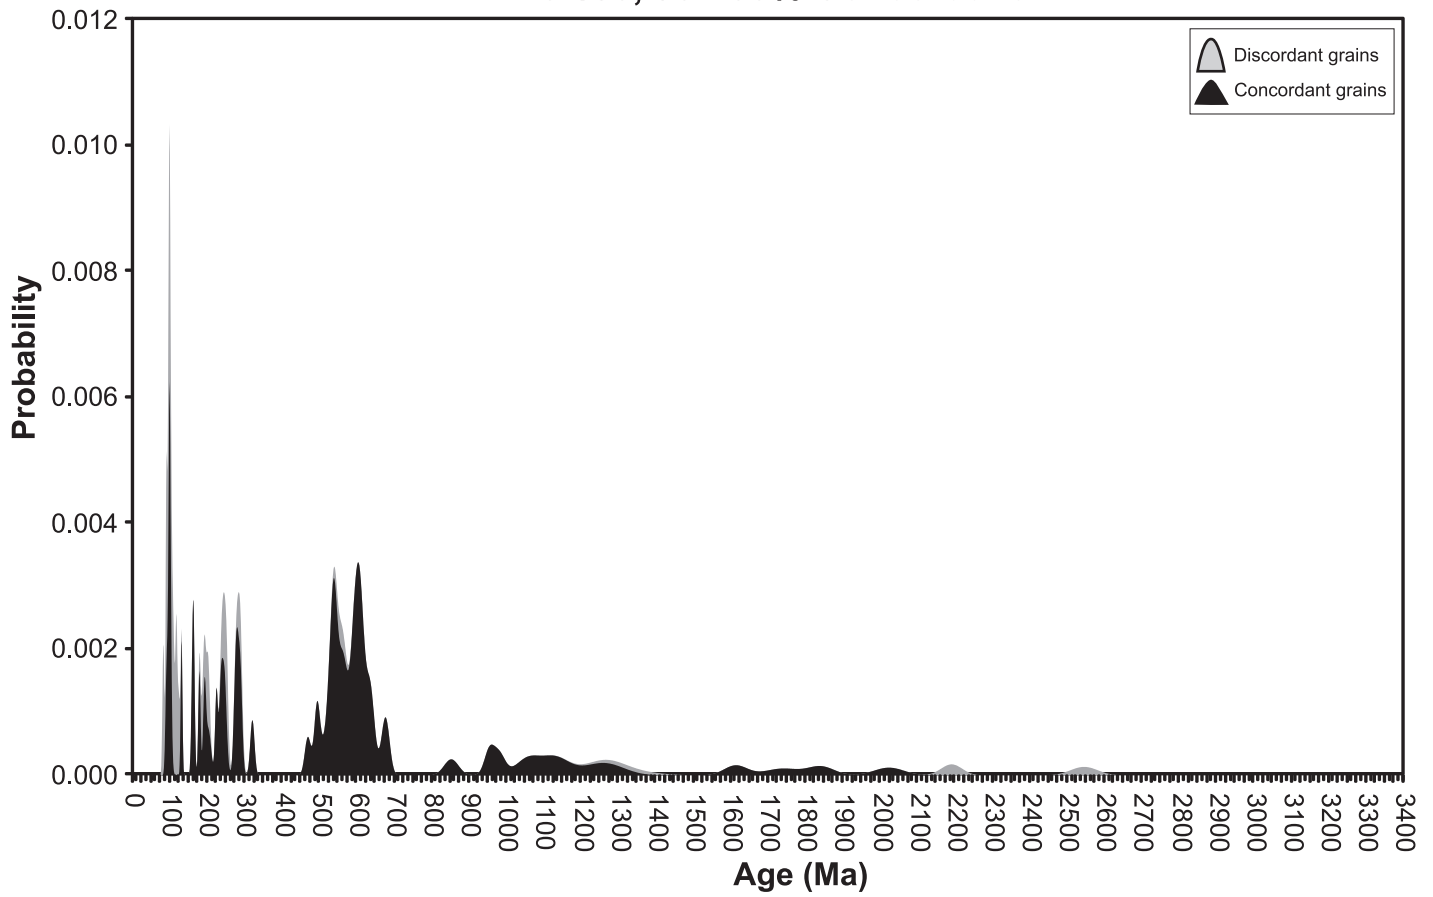

## Concordia

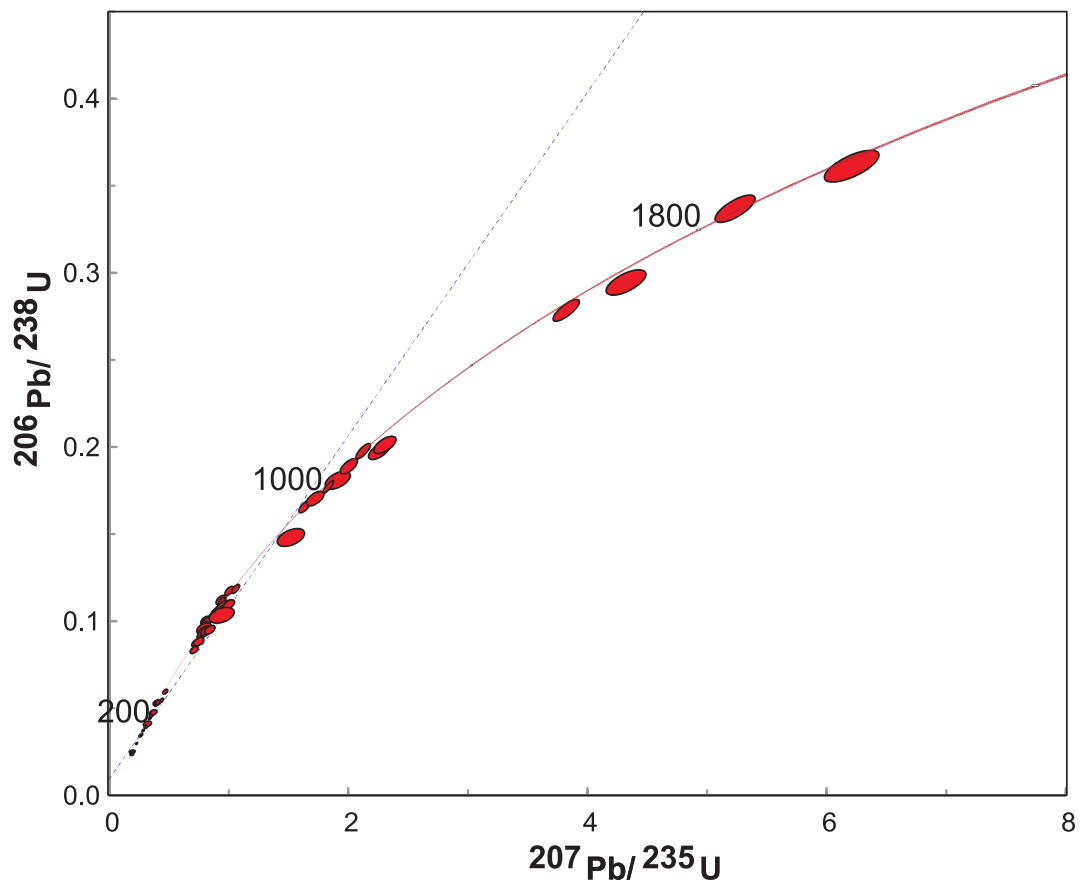

# 74323

$n = 62/73$ , 90-100% Concordant

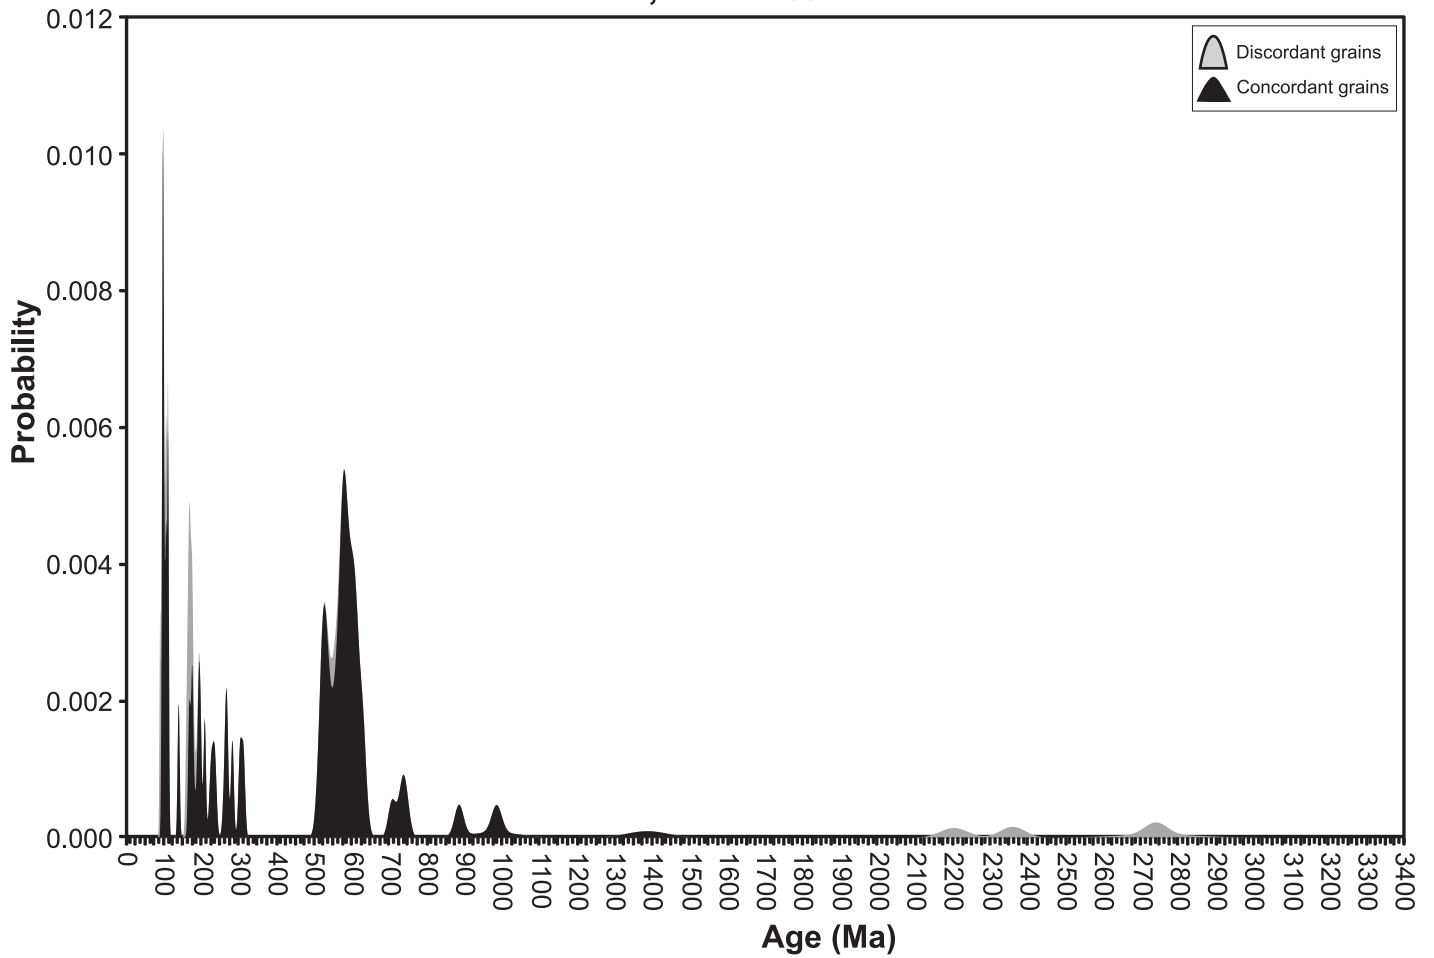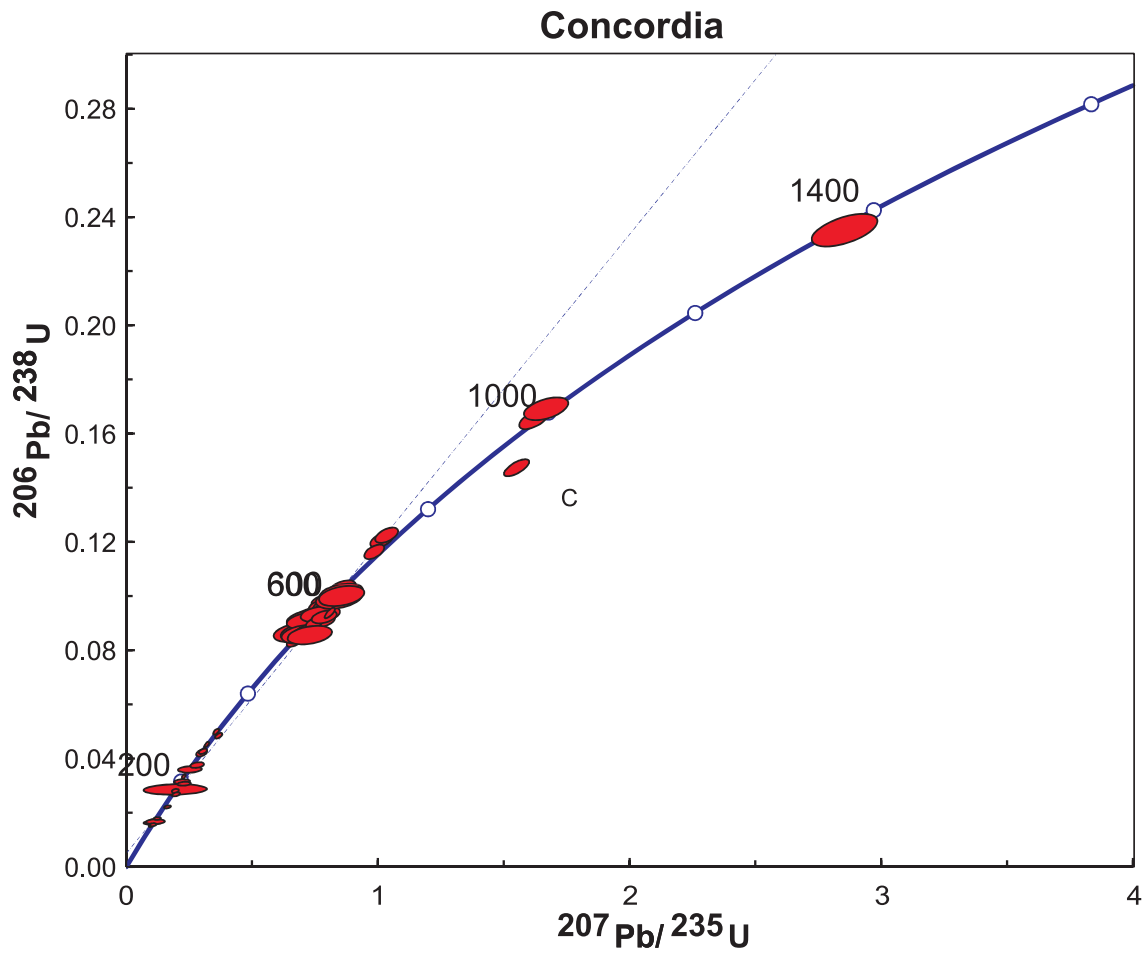

# 74324

$n = 62/80$ , 90-100% Concordant

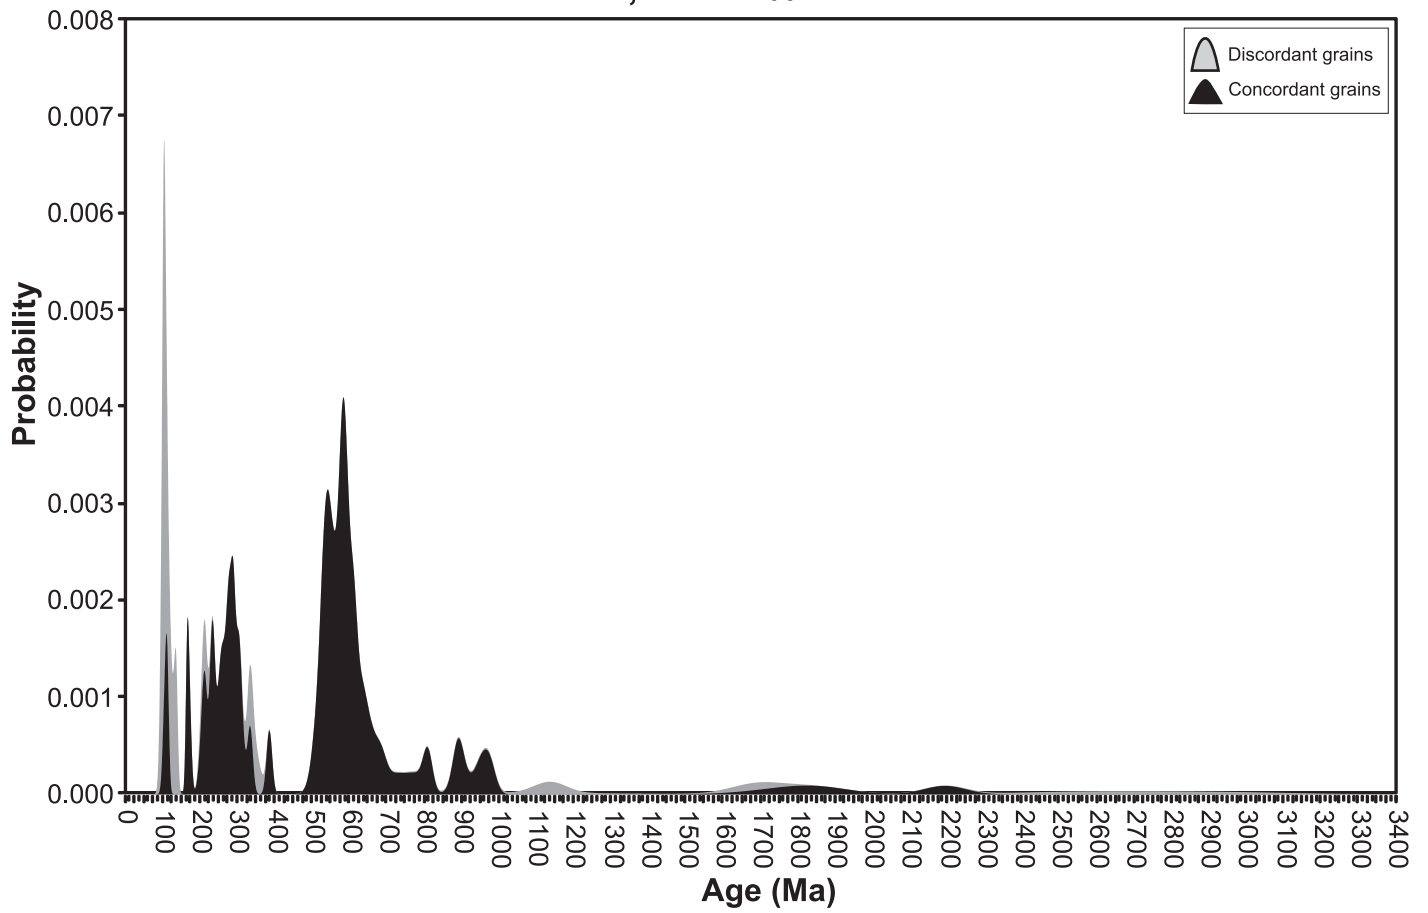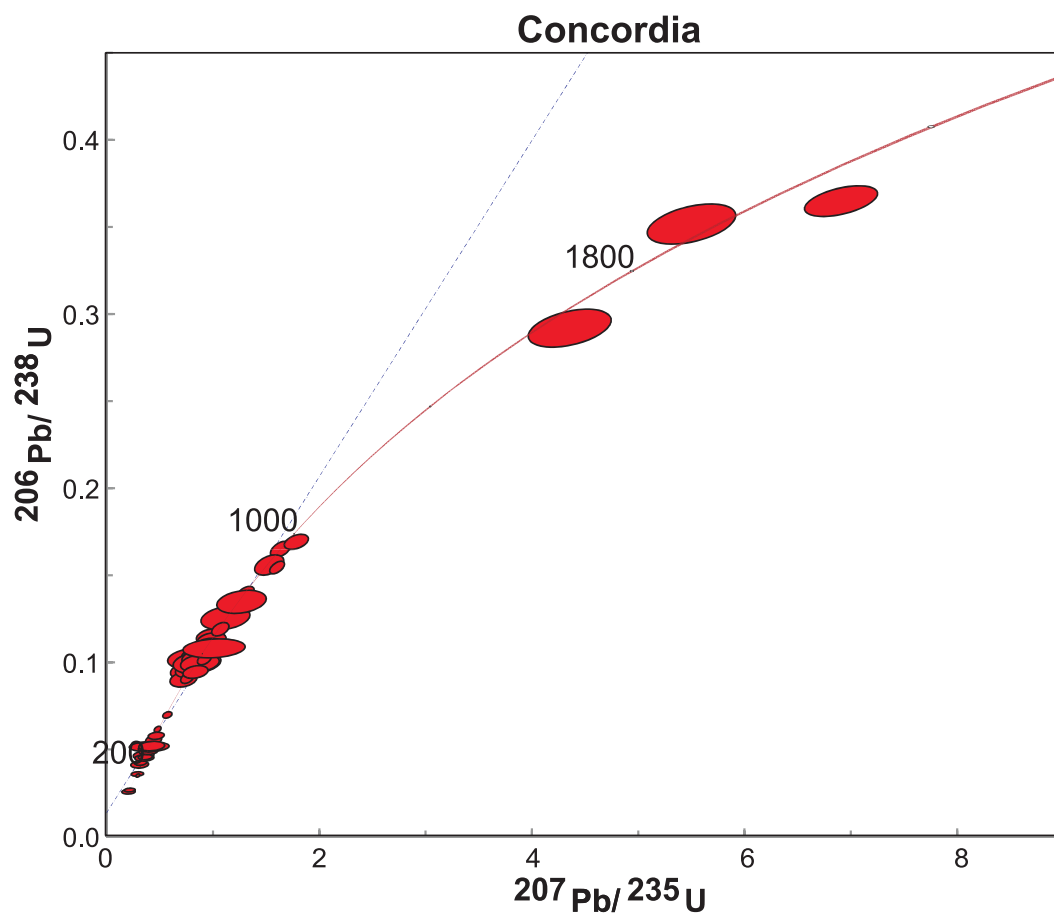

# 74325

$n = 45/76$ , 90-100% Concordant

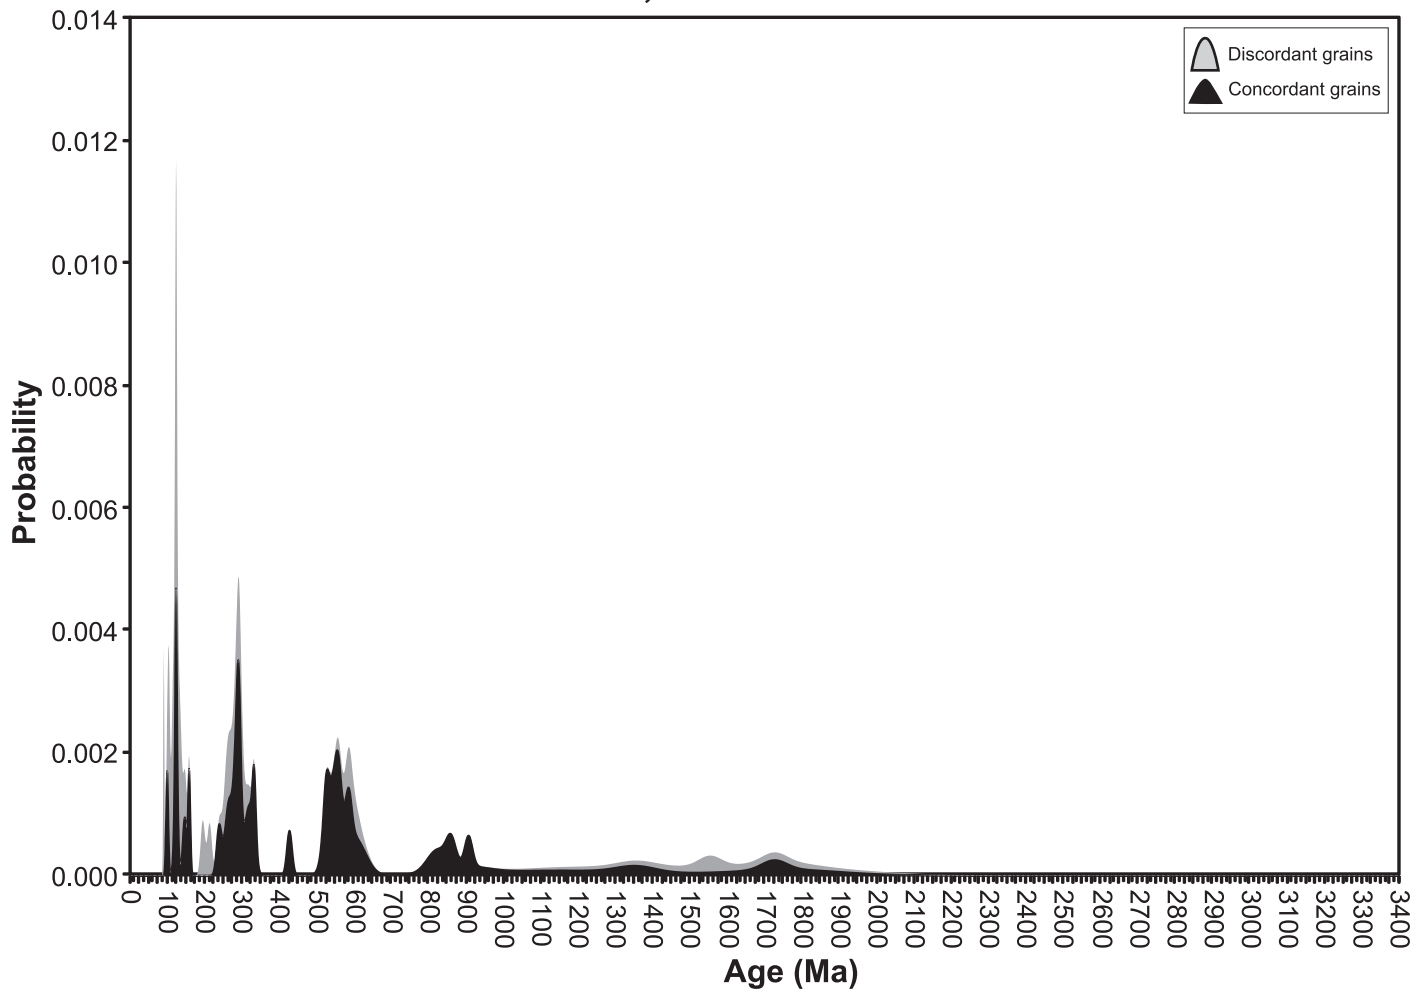

## Concordia

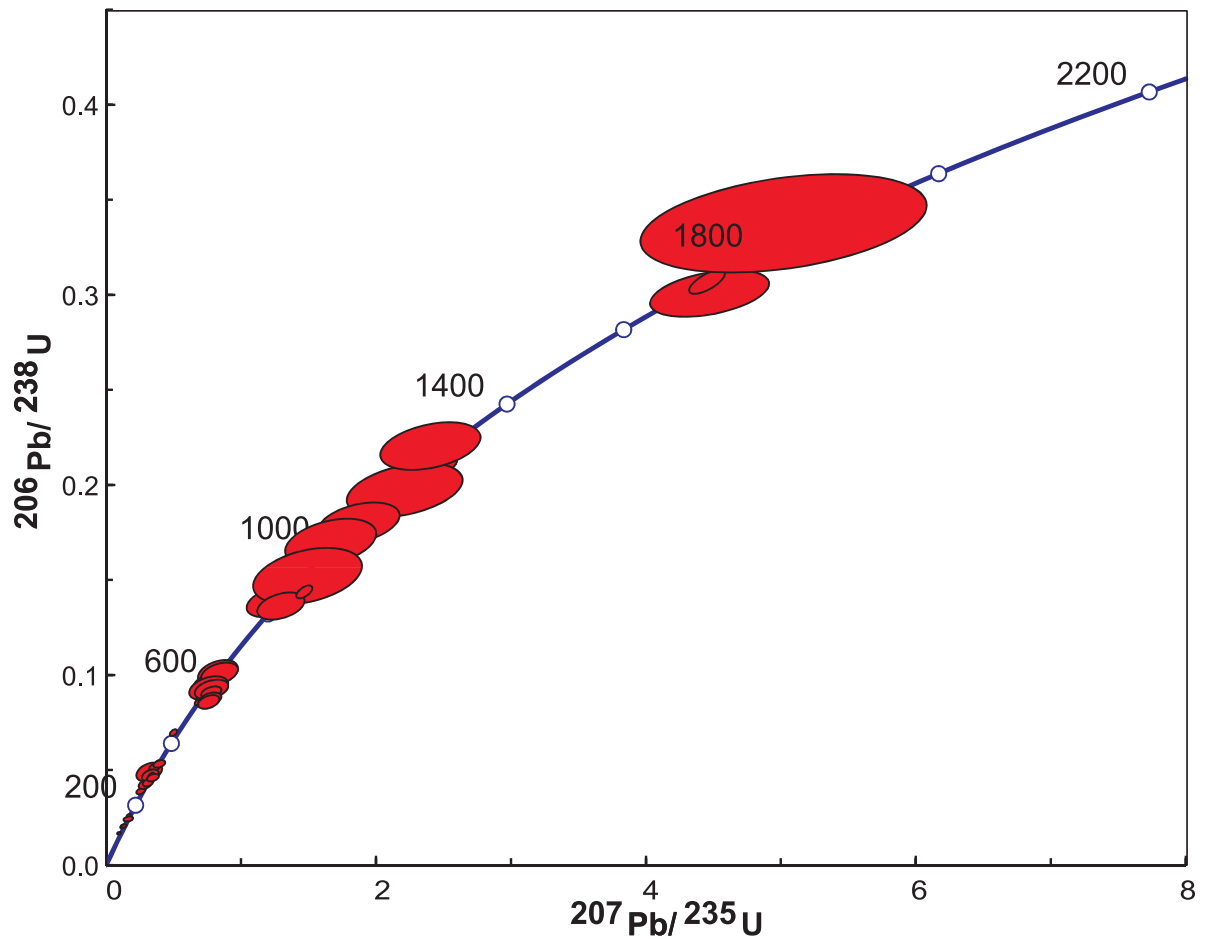

# 74326

$n = 68/80$ , 90-100% Concordant

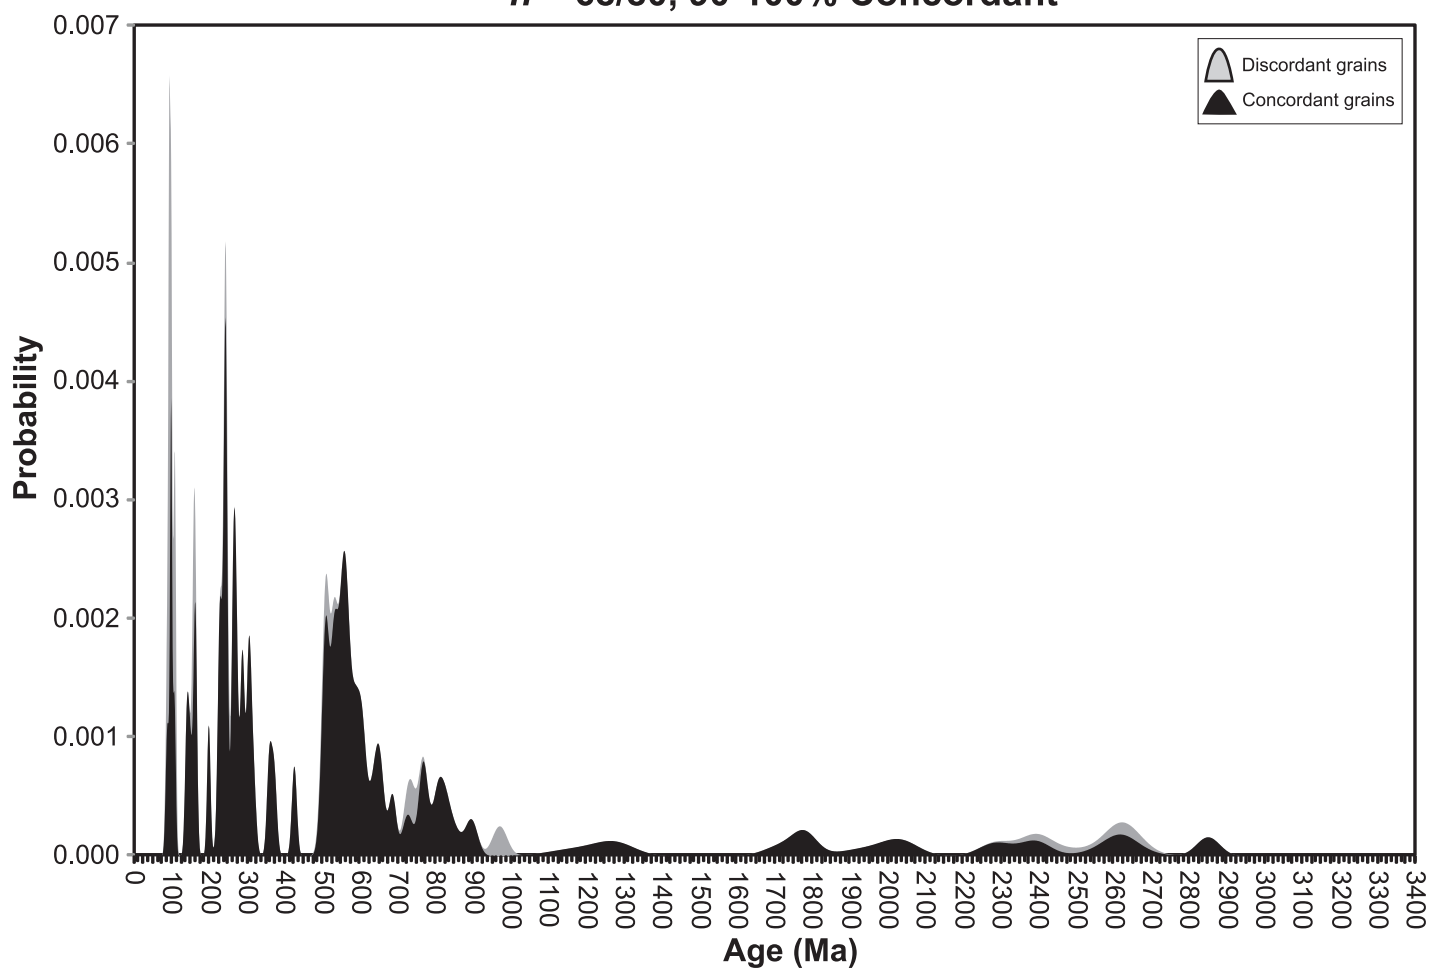

Concordia

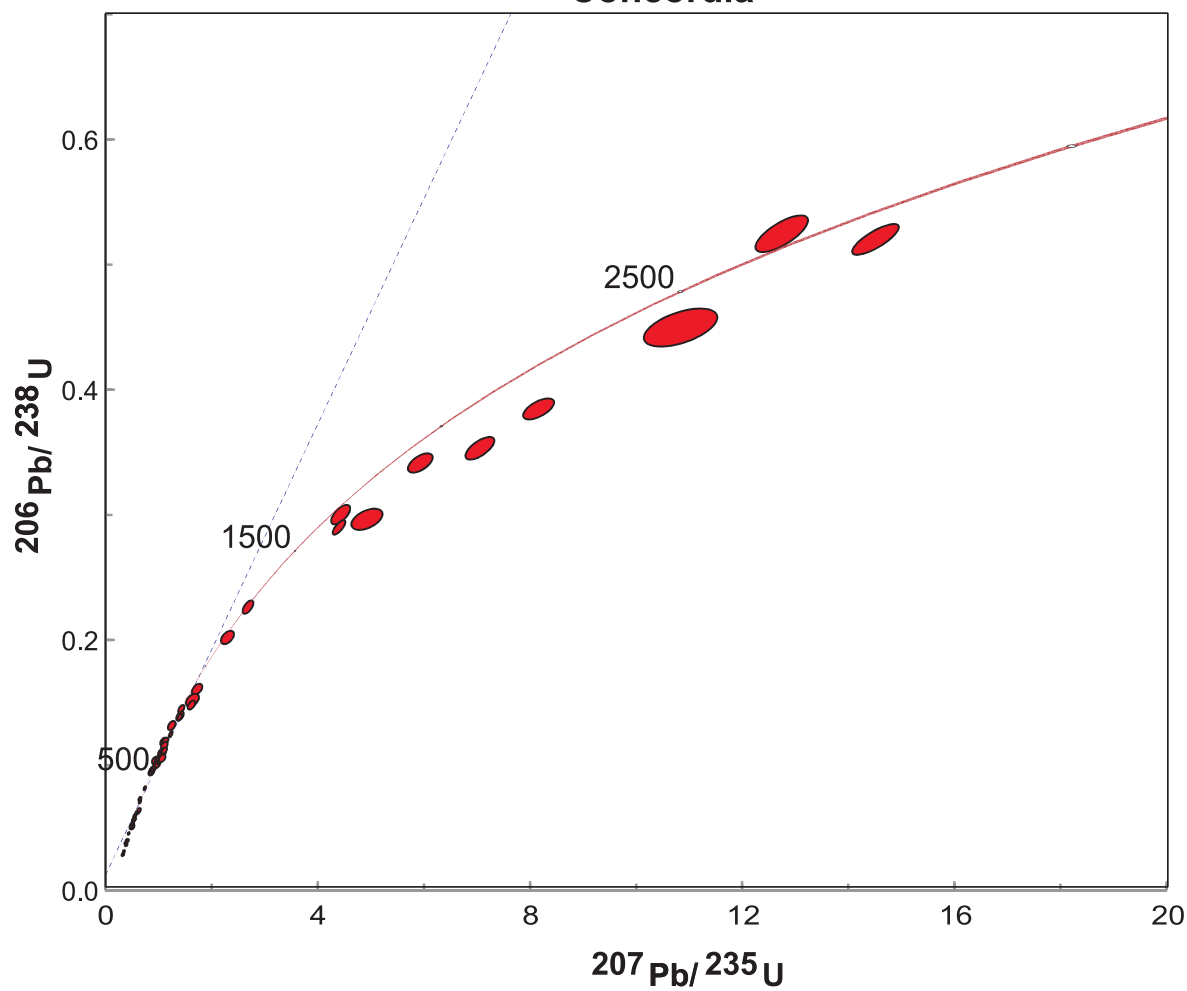

## Supplementary Data

## LA-ICP-MS Methodology



## **Analytical procedures: LA–ICP–MS U–Pb zircon Geochronology**

U–Pb geochronology was conducted using the Laser Ablation Inductively Coupled Plasma Mass Spectrometer (LA–ICP–MS) at Adelaide Microscopy, University of Adelaide. Samples for zircon geochronology were crushed using a jaw crusher, placed in a tungsten carbide mill for 3–5 seconds and sieved using 75  $\mu\text{m}$  and 425  $\mu\text{m}$  mesh, retaining a size fraction between 75–425  $\mu\text{m}$ . Zircon grains were subsequently separated using traditional panning techniques, followed by removal of magnetic mineral grains from the heavier mineral fraction using conventional and neodymium magnets. Approximately 80 zircon grains per sample were randomly handpicked and mounted in epoxy resin. Mounted zircon grains were ground down to approximately half their width.

Epoxy mounts were imaged using a Phillips XL20 SEM with attached Gatan cathodoluminescence (CL) detector at Adelaide Microscopy to determine internal chemical zonation of zircon. A beam accelerating voltage of 12 kV was used, combined with a spot size of 7 when zircon mounts were imaged using CL detector.

U–Pb analysis of zircon was undertaken using an Agilent 7500cs ICPMS with a New Wave 213 nm Nd-YAG laser in a helium ablation atmosphere, following similar methods and operating procedures outlined by Payne et al. (2008; 2010). A laser spot size of 30  $\mu\text{m}$  and repetition rate of 5 Hz was used for zircon analyses. A 40 second gas blank was initially measured followed by 60 seconds of zircon sample ablation. The laser was fired for 10 seconds with the shutter closed seconds prior to ablation in order to allow for beam and crystal stabilisation.

The real-time correction program Glitter version 4.0 (Griffin et al., 2008) was used to correct zircon data. Mass bias and fractionation were corrected for zircon analyses using the GEMOC standard GJ-1 (TIMS normalisation data:  $^{207}\text{Pb}/^{206}\text{Pb} = 608.3$  Ma,  $^{206}\text{Pb}/^{238}\text{U} = 600.7$  Ma and  $^{207}\text{Pb}/^{235}\text{U} = 602.2$  Ma, Jackson et al., 2004). An uncertainty of 1% was assigned to the age of the GJ-1 zircon standard for sample age error calculations to avoid inaccurate age reporting.

Over the duration of this study the reported average normalised ages for GJ-1 are  $609.1 \pm 6.0$  Ma,  $600.5 \pm 1.4$  Ma and  $602.6 \pm 1.3$  Ma for the  $^{207}\text{Pb}/^{206}\text{Pb}$ ,  $^{206}\text{Pb}/^{238}\text{U}$  and  $^{207}\text{Pb}/^{235}\text{U}$  ratios. The ages used for provenance determination are  $^{206}\text{Pb}/^{238}\text{U}$  ages for grains less than 1000 Ma, and  $^{207}\text{Pb}/^{206}\text{Pb}$  ages for grains older than 1000 Ma. This cut-off is placed due to the well-known effect of a reduction in precision of  $^{207}\text{Pb}/^{206}\text{Pb}$  ages in younger zircons (e.g. Ireland et al., 1998; Collins et al., 2007).

An internal standard, the Plesovice zircon standard (ID TIMS U–Pb  $^{206}\text{Pb}/^{238}\text{U}$  age =  $337.13 \pm 0.37$  Ma; Sláma et al., 2008) was used to assess accuracy before and during the analysis of unknowns. Average Plesovice ages obtained during this study were  $^{207}\text{Pb}/^{235}\text{U} = 340.7 \pm 2.1$  Ma,  $^{207}\text{Pb}/^{206}\text{Pb} = 342 \pm 11$  Ma and  $^{206}\text{Pb}/^{238}\text{U} = 340.6 \pm 2.3$  Ma.

Conventional concordia, weighted averages, and probability density distribution plots were generated using Isoplot vers. 4.11 (Ludwig, 2003). Due to the inability of the LA–ICP–MS to measure common Pb, correction for the unknowns was carried out

using the 'CommPbcorr' macro in Microsoft Excel (Andersen, 2002). In most samples, negligible (<0.5% 206Pb) common Pb was inferred in the analyses when the 3D concordia method was employed by 'CommPbcorr'.

## References

- Andersen, T. 2002. Correction of common lead in U–Pb analyses that do not report Pb-204. *Chemical Geology*, **192** (1/2), 59-79.
- Collins, A.S., Santosh, M., Braun, I. & Clark, C. 2007. Age and sedimentary provenance of the Southern Granulites, South India: U–Th–Pb SHRIMP secondary ion mass spectrometry. *Precambrian Research*, **155** (1/2), 125-138.
- Griffin, W.L., Powell, W.J., Pearson, N.J., & O'Reilly, S.Y. 2008. GLITTER: data reduction software for laser ablation ICP-MS. In: Sylvester, P., (ed) *Laser Ablation ICP-MS in the Earth Sciences: Current Practices and Outstanding Issues*, Mineralogical Association of Canada. *Short Course Series*, **40**, 308-311.
- Ireland, T.R., Flottmann, T., Fanning, C.M., Gibson, G.M. & Preiss, W.V. 1998. Development of the early Paleozoic Pacific margin of Gondwana from detrital-zircon ages across the Delamerian orogen. *Geology*, **26** (3), 243-246.
- Jackson, S.E., Pearson, N.J., Griffin, W.L., & Belousova, E.A. 2004. The application of laser ablation-inductively coupled plasma-mass spectrometry to in-situ U/Pb zircon geochronology. *Chemical Geology*, **211**, 47-69.
- Ludwig, K.R. 2003. User's Manual for Isoplot 3.00. *Berkeley Geochronological Center, Special Publication*, **4**, 71.
- Payne, J.L., Ferris, G., Barovich, K.M., & Hand, M. 2010. Pitfalls of classifying ancient magmatic suites with tectonic discrimination diagrams: An example from the Paleoproterozoic Tunkillia Suite, southern Australia. *Precambrian Research*, **177**, 227-240.
- Payne, J.L., Hand, M., Barovich, K.M., & Wade, B.P. 2008. Temporal constraints on the timing of high-grade metamorphism in the northern Gawler Craton; implications for assembly of the Australian Proterozoic. *Australian Journal of Earth Sciences*, **55**, 623-640.
- Sláma, J., Kosler, J., Condon, D.J., Crowley, J.L., Gerdes, A., Hanchar, J.M., Horstwood, M.S.A., Morris, G.A., Nasdala, L., Norberg, N., Schaltegger, U., Schoene, B., Tubrett, M.N., & Whitehouse, M.J. 2008. Plesovice zircon – A new natural reference material for U-Pb and Hf isotopic microanalysis. *Chemical Geology*, **249**, 1-35.

## Supplementary Data

### Zircon Fission Track Data

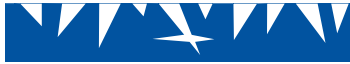

GC743-17 Zircon  
Counted by: PFG

Gnarly Knots-1 1825-1950m

| Slide ref  | Current grain no | N <sub>s</sub> | N <sub>i</sub> | N <sub>a</sub> | ρ <sub>s</sub> | ρ <sub>i</sub> | RATIO | U (ppm) | F.T. AGE (Ma) |
|------------|------------------|----------------|----------------|----------------|----------------|----------------|-------|---------|---------------|
| G1098-5 2  |                  | 260            | 70             | 40             | 1.033E+07      | 2.781E+06      | 3.714 | 91.8    | 257.8 ± 35.2  |
| G1098-5 3  |                  | 287            | 93             | 40             | 1.140E+07      | 3.695E+06      | 3.086 | 121.9   | 214.9 ± 26.1  |
| G1098-5 6  |                  | 294            | 50             | 40             | 1.168E+07      | 1.986E+06      | 5.880 | 65.6    | 403.5 ± 62.4  |
| G1098-5 7  |                  | 509            | 76             | 30             | 2.696E+07      | 4.026E+06      | 6.697 | 132.9   | 457.6 ± 57.2  |
| G1098-5 9  |                  | 121            | 104            | 50             | 3.846E+06      | 3.305E+06      | 1.163 | 109.1   | 81.9 ± 11.1   |
| G1098-5 10 |                  | 187            | 64             | 21             | 1.415E+07      | 4.843E+06      | 2.922 | 159.8   | 203.6 ± 29.8  |
| G1098-5 11 |                  | 149            | 48             | 20             | 1.184E+07      | 3.814E+06      | 3.104 | 125.9   | 216.1 ± 36.2  |
| G1098-5 13 |                  | 229            | 85             | 40             | 9.097E+06      | 3.377E+06      | 2.694 | 111.5   | 188.0 ± 24.2  |
| G1098-5 16 |                  | 272            | 125            | 40             | 1.081E+07      | 4.966E+06      | 2.176 | 163.9   | 152.3 ± 16.8  |
| G1098-5 18 |                  | 360            | 196            | 50             | 1.144E+07      | 6.229E+06      | 1.837 | 205.6   | 128.8 ± 11.8  |
| G1098-5 22 |                  | 393            | 68             | 40             | 1.561E+07      | 2.701E+06      | 5.779 | 89.2    | 396.8 ± 52.8  |
| G1098-5 23 |                  | 233            | 144            | 40             | 9.256E+06      | 5.721E+06      | 1.618 | 188.8   | 113.6 ± 12.3  |
| G1098-5 24 |                  | 227            | 97             | 50             | 7.214E+06      | 3.083E+06      | 2.340 | 101.8   | 163.6 ± 20.2  |
| G1098-5 25 |                  | 465            | 75             | 40             | 1.847E+07      | 2.980E+06      | 6.200 | 98.3    | 424.7 ± 53.7  |
| G1098-5 31 |                  | 272            | 80             | 40             | 1.081E+07      | 3.178E+06      | 3.400 | 104.9   | 236.4 ± 30.5  |
| G1098-5 32 |                  | 188            | 40             | 30             | 9.958E+06      | 2.119E+06      | 4.700 | 69.9    | 324.5 ± 57.0  |
| G1098-5 33 |                  | 158            | 24             | 30             | 8.369E+06      | 1.271E+06      | 6.583 | 42.0    | 450.1 ± 99.1  |
|            |                  | 4604           | 1439           |                | 1.141E+07      | 3.567E+06      |       | 117.7   |               |

Area of basic unit = 6.293E-07 cm<sup>-2</sup>

$\chi^2 = 289.301$  with 16 degrees of freedom

P( $\chi^2$ ) = 0.0%

Age Dispersion = 49.140%

Ns / Ni = 3.199 ± 0.097

Mean Ratio = 3.759 ± 0.447

Ages calculated using a zeta of 87.7 ± 0.8 for U3 glass

ρ<sub>D</sub> = 1.615E+06cm<sup>-2</sup> ND = 2478

ρ<sub>D</sub> interpolated between top of can; ρ<sub>D</sub> = 1.644E+06cm<sup>-2</sup> ND = 1293  
bottom of can; ρ<sub>D</sub> = 1.506E+06cm<sup>-2</sup> ND = 1185

POOLED AGE = 222.7 ± 8.3 Ma

**CENTRAL AGE = 216.9 ± 27.1 Ma**

A:

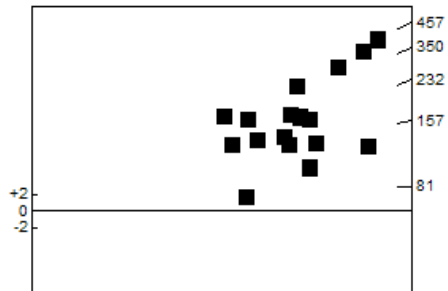



GC743-18 Zircon  
Counted by: PFG

Gnarly Knots-1 2500-2600m

| Slide ref  | Current grain no | N <sub>s</sub> | N <sub>i</sub> | N <sub>a</sub> | ρ <sub>s</sub> | ρ <sub>i</sub> | RATIO | U (ppm) | F.T. AGE (Ma) |
|------------|------------------|----------------|----------------|----------------|----------------|----------------|-------|---------|---------------|
| G1098-6 1  |                  | 98             | 43             | 12             | 1.298E+07      | 5.694E+06      | 2.279 | 188.8   | 158.7 ± 29.2  |
| G1098-6 4  |                  | 162            | 76             | 20             | 1.287E+07      | 6.038E+06      | 2.132 | 200.2   | 148.5 ± 20.9  |
| G1098-6 5  |                  | 111            | 58             | 9              | 1.960E+07      | 1.024E+07      | 1.914 | 339.5   | 133.5 ± 21.8  |
| G1098-6 6  |                  | 92             | 98             | 38             | 3.847E+06      | 4.098E+06      | 0.939 | 135.9   | 65.8 ± 9.7    |
| G1098-6 7  |                  | 162            | 111            | 50             | 5.149E+06      | 3.528E+06      | 1.459 | 117.0   | 102.1 ± 12.8  |
| G1098-6 8  |                  | 73             | 28             | 25             | 4.640E+06      | 1.780E+06      | 2.607 | 59.0    | 181.2 ± 40.5  |
| G1098-6 10 |                  | 145            | 37             | 20             | 1.152E+07      | 2.940E+06      | 3.919 | 97.5    | 270.5 ± 50.2  |
| G1098-6 11 |                  | 117            | 80             | 28             | 6.640E+06      | 4.540E+06      | 1.462 | 150.5   | 102.3 ± 15.0  |
| G1098-6 16 |                  | 264            | 192            | 50             | 8.390E+06      | 6.102E+06      | 1.375 | 202.3   | 96.2 ± 9.4    |
| G1098-6 23 |                  | 225            | 54             | 40             | 8.939E+06      | 2.145E+06      | 4.167 | 71.1    | 287.2 ± 44.0  |
| G1098-6 24 |                  | 163            | 40             | 20             | 1.295E+07      | 3.178E+06      | 4.075 | 105.4   | 281.0 ± 50.0  |
| G1098-6 28 |                  | 165            | 93             | 40             | 6.555E+06      | 3.695E+06      | 1.774 | 122.5   | 123.9 ± 16.3  |
| G1098-6 29 |                  | 116            | 104            | 60             | 3.072E+06      | 2.754E+06      | 1.115 | 91.3    | 78.2 ± 10.7   |
| G1098-6 31 |                  | 212            | 133            | 80             | 4.211E+06      | 2.642E+06      | 1.594 | 87.6    | 111.4 ± 12.6  |
| G1098-6 33 |                  | 108            | 45             | 24             | 7.151E+06      | 2.980E+06      | 2.400 | 98.8    | 167.0 ± 29.9  |
| G1098-6 38 |                  | 555            | 304            | 100            | 8.819E+06      | 4.831E+06      | 1.826 | 160.2   | 127.4 ± 9.5   |
| G1098-6 39 |                  | 100            | 165            | 40             | 3.973E+06      | 6.555E+06      | 0.606 | 217.3   | 42.6 ± 5.5    |
| G1098-6 44 |                  | 90             | 47             | 25             | 5.721E+06      | 2.987E+06      | 1.915 | 99.0    | 133.6 ± 24.2  |
| G1098-6 49 |                  | 217            | 55             | 20             | 1.724E+07      | 4.370E+06      | 3.945 | 144.9   | 272.3 ± 41.5  |
| G1098-6 56 |                  | 203            | 54             | 20             | 1.613E+07      | 4.290E+06      | 3.759 | 142.3   | 259.7 ± 40.2  |
|            |                  | 3378           | 1817           |                | 7.445E+06      | 4.005E+06      |       | 132.8   |               |

Area of basic unit = 6.293E-07 cm<sup>-2</sup>

$\chi^2 = 266.059$  with 19 degrees of freedom

P( $\chi^2$ ) = 0.0%

Age Dispersion = 48.024%

Ns / Ni = 1.859 ± 0.054

Mean Ratio = 2.263 ± 0.251

Ages calculated using a zeta of 87.7 ± 0.8 for U3 glass

ρ<sub>D</sub> = 1.608E+06cm<sup>-2</sup> ND = 2478

ρ<sub>D</sub> interpolated between top of can; ρ<sub>D</sub> = 1.644E+06cm<sup>-2</sup> ND = 1293  
bottom of can; ρ<sub>D</sub> = 1.506E+06cm<sup>-2</sup> ND = 1185

POOLED AGE = 129.7 ± 4.7 Ma

**CENTRAL AGE = 134.1 ± 15.3 Ma**

A:

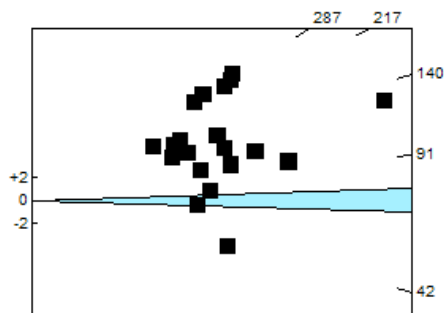



GC743-19 Zircon  
Counted by: PFG

Gnarly Knots-1 2890-2990m

| Slide ref  | Current grain no | N <sub>s</sub> | N <sub>i</sub> | N <sub>a</sub> | ρ <sub>s</sub> | ρ <sub>i</sub> | RATIO | U (ppm) | F.T. AGE (Ma) |
|------------|------------------|----------------|----------------|----------------|----------------|----------------|-------|---------|---------------|
| G1098-7 1  |                  | 183            | 101            | 40             | 7.270E+06      | 4.012E+06      | 1.812 | 133.6   | 125.9 ± 15.9  |
| G1098-7 4  |                  | 272            | 53             | 40             | 1.081E+07      | 2.106E+06      | 5.132 | 70.1    | 350.4 ± 53.2  |
| G1098-7 6  |                  | 143            | 58             | 20             | 1.136E+07      | 4.608E+06      | 2.466 | 153.5   | 170.7 ± 26.8  |
| G1098-7 10 |                  | 188            | 40             | 20             | 1.494E+07      | 3.178E+06      | 4.700 | 105.8   | 321.7 ± 56.5  |
| G1098-7 11 |                  | 142            | 51             | 20             | 1.128E+07      | 4.052E+06      | 2.784 | 135.0   | 192.5 ± 31.7  |
| G1098-7 13 |                  | 97             | 69             | 40             | 3.853E+06      | 2.741E+06      | 1.406 | 91.3    | 97.9 ± 15.6   |
| G1098-7 15 |                  | 173            | 80             | 40             | 6.873E+06      | 3.178E+06      | 2.162 | 105.8   | 150.0 ± 20.5  |
| G1098-7 16 |                  | 103            | 76             | 25             | 6.547E+06      | 4.831E+06      | 1.355 | 160.9   | 94.4 ± 14.4   |
| G1098-7 17 |                  | 208            | 137            | 50             | 6.611E+06      | 4.354E+06      | 1.518 | 145.0   | 105.7 ± 11.9  |
| G1098-7 19 |                  | 104            | 85             | 50             | 3.305E+06      | 2.701E+06      | 1.224 | 90.0    | 85.3 ± 12.6   |
| G1098-7 21 |                  | 139            | 26             | 20             | 1.104E+07      | 2.066E+06      | 5.346 | 68.8    | 364.7 ± 78.3  |
| G1098-7 26 |                  | 98             | 66             | 25             | 6.229E+06      | 4.195E+06      | 1.485 | 139.7   | 103.4 ± 16.6  |
| G1098-7 27 |                  | 303            | 100            | 50             | 9.630E+06      | 3.178E+06      | 3.030 | 105.8   | 209.2 ± 24.6  |
| G1098-7 38 |                  | 126            | 24             | 25             | 8.009E+06      | 1.526E+06      | 5.250 | 50.8    | 358.3 ± 80.2  |
| G1098-7 43 |                  | 161            | 90             | 50             | 5.117E+06      | 2.860E+06      | 1.789 | 95.3    | 124.3 ± 16.6  |
| G1098-7 44 |                  | 167            | 96             | 50             | 5.307E+06      | 3.051E+06      | 1.740 | 101.6   | 120.9 ± 15.7  |
| G1098-7 45 |                  | 197            | 207            | 100            | 3.130E+06      | 3.289E+06      | 0.952 | 109.6   | 66.4 ± 6.8    |
| G1098-7 47 |                  | 214            | 200            | 50             | 6.801E+06      | 6.356E+06      | 1.070 | 211.7   | 74.7 ± 7.5    |
| G1098-7 48 |                  | 248            | 192            | 80             | 4.926E+06      | 3.814E+06      | 1.292 | 127.0   | 90.0 ± 8.9    |
| G1098-7 59 |                  | 141            | 124            | 50             | 4.481E+06      | 3.941E+06      | 1.137 | 131.3   | 79.3 ± 9.9    |
|            |                  | 3407           | 1875           |                | 6.407E+06      | 3.526E+06      |       | 117.4   |               |

Area of basic unit = 6.293E-07 cm<sup>-2</sup>

$\chi^2 = 289.086$  with 19 degrees of freedom

P( $\chi^2$ ) = 0.0%

Age Dispersion = 47.803%

Ns / Ni = 1.817 ± 0.052

Mean Ratio = 2.382 ± 0.337

Ages calculated using a zeta of 87.7 ± 0.8 for U3 glass

ρ<sub>D</sub> = 1.600E+06cm<sup>-2</sup> ND=2478

ρ<sub>D</sub> interpolated between top of can; ρ<sub>D</sub> = 1.644E+06cm<sup>-2</sup> ND=1293  
bottom of can; ρ<sub>D</sub> = 1.506E+06cm<sup>-2</sup> ND=1185

POOLED AGE = 126.3 ± 4.6 Ma

**CENTRAL AGE = 133.1 ± 15.1 Ma**

A:

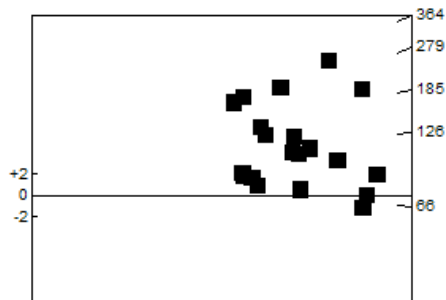

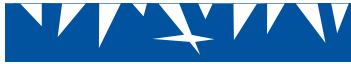

GC743-20 Zircon  
Counted by: PFG

Gnarly Knots-1 3400-3500m

| Slide<br>ref | Current<br>grain no | N <sub>s</sub> | N <sub>i</sub> | N <sub>a</sub> | ρ <sub>s</sub> | ρ <sub>i</sub> | RATIO | U<br>(ppm) | F.T. AGE<br>(Ma) |
|--------------|---------------------|----------------|----------------|----------------|----------------|----------------|-------|------------|------------------|
| G1098-8 1    |                     | 83             | 82             | 16             | 8.243E+06      | 8.144E+06      | 1.012 | 272.5      | 70.3 ± 11.1      |
| G1098-8 3    |                     | 115            | 34             | 15             | 1.218E+07      | 3.602E+06      | 3.382 | 120.5      | 232.1 ± 45.6     |
| G1098-8 4    |                     | 174            | 63             | 20             | 1.382E+07      | 5.006E+06      | 2.762 | 167.5      | 190.1 ± 28.3     |
| G1098-8 5    |                     | 90             | 71             | 16             | 8.939E+06      | 7.051E+06      | 1.268 | 235.9      | 88.0 ± 14.1      |
| G1098-8 10   |                     | 118            | 60             | 25             | 7.500E+06      | 3.814E+06      | 1.967 | 127.6      | 135.9 ± 21.8     |
| G1098-8 11   |                     | 251            | 120            | 40             | 9.971E+06      | 4.767E+06      | 2.092 | 159.5      | 144.5 ± 16.3     |
| G1098-8 12   |                     | 85             | 49             | 24             | 5.628E+06      | 3.244E+06      | 1.735 | 108.5      | 120.1 ± 21.7     |
| G1098-8 18   |                     | 146            | 28             | 25             | 9.280E+06      | 1.780E+06      | 5.214 | 59.5       | 354.3 ± 73.5     |
| G1098-8 20   |                     | 71             | 93             | 24             | 4.701E+06      | 6.158E+06      | 0.763 | 206.0      | 53.1 ± 8.5       |
| G1098-8 27   |                     | 63             | 43             | 20             | 5.006E+06      | 3.416E+06      | 1.465 | 114.3      | 101.5 ± 20.2     |
| G1098-8 28   |                     | 102            | 69             | 28             | 5.789E+06      | 3.916E+06      | 1.478 | 131.0      | 102.5 ± 16.1     |
| G1098-8 36   |                     | 145            | 151            | 18             | 1.280E+07      | 1.333E+07      | 0.960 | 446.0      | 66.7 ± 7.9       |
| G1098-8 38   |                     | 101            | 19             | 25             | 6.420E+06      | 1.208E+06      | 5.316 | 40.4       | 361.1 ± 90.6     |
| G1098-8 39   |                     | 40             | 42             | 25             | 2.543E+06      | 2.670E+06      | 0.952 | 89.3       | 66.2 ± 14.7      |
| G1098-8 40   |                     | 89             | 36             | 20             | 7.071E+06      | 2.860E+06      | 2.472 | 95.7       | 170.4 ± 33.9     |
| G1098-8 47   |                     | 78             | 53             | 25             | 4.958E+06      | 3.369E+06      | 1.472 | 112.7      | 102.0 ± 18.3     |
| G1098-8 48   |                     | 118            | 17             | 15             | 1.250E+07      | 1.801E+06      | 6.941 | 60.3       | 467.5 ± 121.7    |
| G1098-8 50   |                     | 131            | 48             | 50             | 4.163E+06      | 1.526E+06      | 2.729 | 51.0       | 187.9 ± 32.0     |
| G1098-8 53   |                     | 94             | 17             | 15             | 9.958E+06      | 1.801E+06      | 5.529 | 60.3       | 375.2 ± 99.2     |
| G1098-8 58   |                     | 77             | 44             | 24             | 5.098E+06      | 2.913E+06      | 1.750 | 97.5       | 121.1 ± 23.0     |
|              |                     | 2171           | 1139           |                | 7.340E+06      | 3.851E+06      |       | 128.8      |                  |

Area of basic unit = 6.293E-07 cm<sup>-2</sup>

$\chi^2 = 226.367$  with 19 degrees of freedom

P( $\chi^2$ ) = 0.0%

Age Dispersion = 54.637%

Ns / Ni = 1.906 ± 0.070

Mean Ratio = 2.563 ± 0.402

Ages calculated using a zeta of 87.7 ± 0.8 for U3 glass

ρ<sub>D</sub> = 1.593E+06cm<sup>-2</sup> ND=2478

ρ<sub>D</sub> interpolated between top of can; ρ<sub>D</sub> = 1.644E+06cm<sup>-2</sup> ND = 1293  
bottom of can; ρ<sub>D</sub> = 1.506E+06cm<sup>-2</sup> ND = 1185

POOLED AGE = 131.8 ± 5.6 Ma

**CENTRAL AGE = 134.7 ± 17.5 Ma**

A:

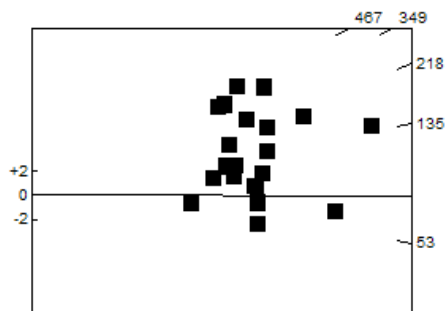

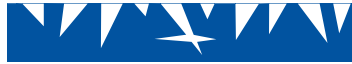

GC743-21 Zircon  
Counted by: PFG

Gnarly Knots-1 3800-3900m

| Slide ref  | Current grain no | N <sub>s</sub> | N <sub>i</sub> | N <sub>a</sub> | ρ <sub>s</sub> | ρ <sub>i</sub> | RATIO | U (ppm) | F.T. AGE (Ma) |      |
|------------|------------------|----------------|----------------|----------------|----------------|----------------|-------|---------|---------------|------|
| G1098-9 1  |                  | 223            | 53             | 25             | 1.417E+07      | 3.369E+06      | 4.208 | 113.2   | 286.2 ±       | 44.2 |
| G1098-9 3  |                  | 258            | 38             | 50             | 8.200E+06      | 1.208E+06      | 6.789 | 40.6    | 455.7 ±       | 79.8 |
| G1098-9 4  |                  | 110            | 55             | 25             | 6.992E+06      | 3.496E+06      | 2.000 | 117.5   | 137.6 ±       | 22.9 |
| G1098-9 14 |                  | 63             | 31             | 20             | 5.006E+06      | 2.463E+06      | 2.032 | 82.8    | 139.8 ±       | 30.8 |
| G1098-9 15 |                  | 81             | 28             | 21             | 6.129E+06      | 2.119E+06      | 2.893 | 71.2    | 198.1 ±       | 43.6 |
| G1098-9 22 |                  | 95             | 37             | 9              | 1.677E+07      | 6.533E+06      | 2.568 | 219.6   | 176.1 ±       | 34.4 |
| G1098-9 23 |                  | 159            | 33             | 20             | 1.263E+07      | 2.622E+06      | 4.818 | 88.1    | 326.7 ±       | 62.9 |
| G1098-9 24 |                  | 180            | 98             | 20             | 1.430E+07      | 7.786E+06      | 1.837 | 261.7   | 126.5 ±       | 16.1 |
| G1098-9 25 |                  | 147            | 59             | 30             | 7.786E+06      | 3.125E+06      | 2.492 | 105.0   | 171.0 ±       | 26.6 |
| G1098-9 28 |                  | 85             | 62             | 20             | 6.754E+06      | 4.926E+06      | 1.371 | 165.6   | 94.6 ±        | 15.9 |
| G1098-9 30 |                  | 113            | 114            | 100            | 1.796E+06      | 1.812E+06      | 0.991 | 60.9    | 68.6 ±        | 9.2  |
| G1098-9 31 |                  | 119            | 36             | 25             | 7.564E+06      | 2.288E+06      | 3.306 | 76.9    | 225.9 ±       | 43.3 |
| G1098-9 34 |                  | 223            | 68             | 20             | 1.772E+07      | 5.403E+06      | 3.279 | 181.6   | 224.1 ±       | 31.4 |
| G1098-9 36 |                  | 103            | 18             | 20             | 8.184E+06      | 1.430E+06      | 5.722 | 48.1    | 386.1 ±       | 99.0 |
| G1098-9 38 |                  | 109            | 31             | 20             | 8.660E+06      | 2.463E+06      | 3.516 | 82.8    | 240.0 ±       | 49.1 |
| G1098-9 40 |                  | 257            | 41             | 20             | 2.042E+07      | 3.258E+06      | 6.268 | 109.5   | 421.8 ±       | 71.5 |
| G1098-9 47 |                  | 106            | 63             | 18             | 9.358E+06      | 5.562E+06      | 1.683 | 186.9   | 116.0 ±       | 18.6 |
| G1098-9 50 |                  | 197            | 144            | 20             | 1.565E+07      | 1.144E+07      | 1.368 | 384.5   | 94.4 ±        | 10.6 |
| G1098-9 57 |                  | 154            | 67             | 20             | 1.224E+07      | 5.323E+06      | 2.299 | 178.9   | 157.9 ±       | 23.4 |
| G1098-9 66 |                  | 78             | 76             | 40             | 3.099E+06      | 3.019E+06      | 1.026 | 101.5   | 71.0 ±        | 11.5 |
|            |                  | 2860           | 1152           |                | 8.370E+06      | 3.371E+06      |       | 113.3   |               |      |

Area of basic unit = 6.293E-07 cm<sup>-2</sup>

$\chi^2 = 256.280$  with 19 degrees of freedom

P( $\chi^2$ ) = 0.0%

Age Dispersion = 51.244%

Ns / Ni = 2.483 ± 0.087

Mean Ratio = 3.023 ± 0.387

Ages calculated using a zeta of 87.7 ± 0.8 for U3 glass

ρ<sub>D</sub> = 1.586E+06cm<sup>-2</sup> ND = 2478

ρ<sub>D</sub> interpolated between top of can; ρ<sub>D</sub> = 1.644E+06cm<sup>-2</sup> ND = 1293  
bottom of can; ρ<sub>D</sub> = 1.506E+06cm<sup>-2</sup> ND = 1185

POOLED AGE = 170.4 ± 7.0 Ma

**CENTRAL AGE = 167.4 ± 20.4 Ma**

A:

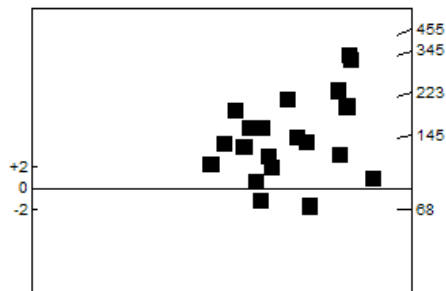





GC743-22 Zircon  
Counted by: PFG

Gnarly Knots-1 4000-4110m

| Slide<br>ref | Current<br>grain no | N <sub>s</sub> | N <sub>i</sub> | N <sub>a</sub> | ρ <sub>s</sub> | ρ <sub>i</sub> | RATIO | U<br>(ppm) | F.T. AGE<br>(Ma) |      |
|--------------|---------------------|----------------|----------------|----------------|----------------|----------------|-------|------------|------------------|------|
| G1098-1 5    |                     | 134            | 47             | 25             | 8.517E+06      | 2.987E+06      | 2.851 | 100.9      | 194.4 ±          | 33.2 |
| G1098-1 6    |                     | 160            | 62             | 24             | 1.059E+07      | 4.105E+06      | 2.581 | 138.6      | 176.2 ±          | 26.6 |
| G1098-1 8    |                     | 117            | 102            | 16             | 1.162E+07      | 1.013E+07      | 1.147 | 342.0      | 78.9 ±           | 10.8 |
| G1098-1 10   |                     | 145            | 93             | 25             | 9.217E+06      | 5.911E+06      | 1.559 | 199.6      | 107.0 ±          | 14.4 |
| G1098-1 16   |                     | 118            | 144            | 36             | 5.209E+06      | 6.356E+06      | 0.819 | 214.6      | 56.5 ±           | 7.1  |
| G1098-1 18   |                     | 72             | 55             | 15             | 7.628E+06      | 5.827E+06      | 1.309 | 196.7      | 90.0 ±           | 16.2 |
| G1098-1 19   |                     | 93             | 47             | 12             | 1.232E+07      | 6.224E+06      | 1.979 | 210.1      | 135.5 ±          | 24.4 |
| G1098-1 27   |                     | 175            | 222            | 30             | 9.270E+06      | 1.176E+07      | 0.788 | 397.0      | 54.3 ±           | 5.6  |
| G1098-1 28   |                     | 192            | 48             | 16             | 1.907E+07      | 4.767E+06      | 4.000 | 161.0      | 271.1 ±          | 44.2 |
| G1098-1 32   |                     | 227            | 69             | 20             | 1.804E+07      | 5.482E+06      | 3.290 | 185.1      | 223.8 ±          | 31.2 |
| G1098-1 33   |                     | 118            | 99             | 50             | 3.750E+06      | 3.146E+06      | 1.192 | 106.2      | 82.0 ±           | 11.3 |
| G1098-1 38   |                     | 121            | 107            | 30             | 6.409E+06      | 5.668E+06      | 1.131 | 191.4      | 77.8 ±           | 10.5 |
| G1098-1 39   |                     | 321            | 99             | 40             | 1.275E+07      | 3.933E+06      | 3.242 | 132.8      | 220.6 ±          | 25.8 |
| G1098-1 42   |                     | 98             | 71             | 16             | 9.733E+06      | 7.051E+06      | 1.380 | 238.1      | 94.8 ±           | 14.9 |
| G1098-1 44   |                     | 133            | 53             | 40             | 5.284E+06      | 2.106E+06      | 2.509 | 71.1       | 171.4 ±          | 28.1 |
| G1098-1 45   |                     | 74             | 24             | 25             | 4.704E+06      | 1.526E+06      | 3.083 | 51.5       | 210.0 ±          | 49.5 |
| G1098-1 46   |                     | 63             | 17             | 15             | 6.674E+06      | 1.801E+06      | 3.706 | 60.8       | 251.6 ±          | 69.0 |
| G1098-1 55   |                     | 189            | 60             | 25             | 1.201E+07      | 3.814E+06      | 3.150 | 128.8      | 214.5 ±          | 32.1 |
| G1098-1 57   |                     | 363            | 114            | 40             | 1.442E+07      | 4.529E+06      | 3.184 | 152.9      | 216.7 ±          | 23.8 |
| G1098-1 63   |                     | 102            | 85             | 40             | 4.052E+06      | 3.377E+06      | 1.200 | 114.0      | 82.5 ±           | 12.3 |
|              |                     | 3015           | 1618           |                | 8.872E+06      | 4.761E+06      |       | 160.8      |                  |      |

Area of basic unit = 6.293E-07 cm<sup>-2</sup>

$\chi^2 = 309.550$  with 19 degrees of freedom

P( $\chi^2$ ) = 0.0%

Age Dispersion = 49.262%

Ns / Ni = 1.863 ± 0.057

Mean Ratio = 2.205 ± 0.236

Ages calculated using a zeta of 87.7 ± 0.8 for U3 glass

ρ<sub>D</sub> = 1.579E+06cm<sup>-2</sup> ND = 2478

ρ<sub>D</sub> interpolated between top of can; ρ<sub>D</sub> = 1.644E+06cm<sup>-2</sup> ND = 1293  
bottom of can; ρ<sub>D</sub> = 1.506E+06cm<sup>-2</sup> ND = 1185

POOLED AGE = 127.7 ± 4.8 Ma

**CENTRAL AGE = 127.8 ± 15.0 Ma**

A:

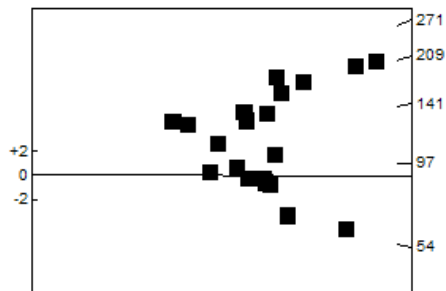



GC743-23 Zircon  
Counted by: PFG

Gnarly Knots-1 4200-4300m

| Slide<br>ref | Current<br>grain no | N <sub>s</sub> | N <sub>i</sub> | N <sub>a</sub> | ρ <sub>s</sub> | ρ <sub>i</sub> | RATIO | U<br>(ppm) | F.T. AGE<br>(Ma) |
|--------------|---------------------|----------------|----------------|----------------|----------------|----------------|-------|------------|------------------|
| G1098-1 1    |                     | 119            | 107            | 30             | 6.303E+06      | 5.668E+06      | 1.112 | 192.2      | 76.2 ± 10.3      |
| G1098-1 4    |                     | 123            | 47             | 20             | 9.773E+06      | 3.734E+06      | 2.617 | 126.7      | 177.9 ± 30.8     |
| G1098-1 8    |                     | 145            | 66             | 25             | 9.217E+06      | 4.195E+06      | 2.197 | 142.3      | 149.6 ± 22.5     |
| G1098-1 9    |                     | 130            | 82             | 40             | 5.164E+06      | 3.258E+06      | 1.585 | 110.5      | 108.3 ± 15.5     |
| G1098-1 11   |                     | 152            | 33             | 25             | 9.662E+06      | 2.098E+06      | 4.606 | 71.1       | 309.8 ± 59.9     |
| G1098-1 12   |                     | 155            | 126            | 50             | 4.926E+06      | 4.004E+06      | 1.230 | 135.8      | 84.2 ± 10.3      |
| G1098-1 14   |                     | 448            | 109            | 40             | 1.780E+07      | 4.330E+06      | 4.110 | 146.9      | 277.2 ± 30.2     |
| G1098-1 16   |                     | 99             | 75             | 16             | 9.832E+06      | 7.449E+06      | 1.320 | 252.6      | 90.3 ± 14.0      |
| G1098-1 23   |                     | 74             | 71             | 15             | 7.839E+06      | 7.522E+06      | 1.042 | 255.1      | 71.4 ± 12.0      |
| G1098-1 38   |                     | 276            | 121            | 40             | 1.096E+07      | 4.807E+06      | 2.281 | 163.0      | 155.3 ± 17.3     |
| G1098-1 42   |                     | 299            | 48             | 25             | 1.901E+07      | 3.051E+06      | 6.229 | 103.5      | 415.6 ± 65.3     |
| G1098-1 50   |                     | 140            | 142            | 50             | 4.449E+06      | 4.513E+06      | 0.986 | 153.1      | 67.6 ± 8.2       |
| G1098-1 55   |                     | 89             | 74             | 20             | 7.071E+06      | 5.880E+06      | 1.203 | 199.4      | 82.3 ± 13.1      |
| G1098-1 62   |                     | 81             | 13             | 25             | 5.149E+06      | 8.263E+05      | 6.231 | 28.0       | 415.7 ± 124.5    |
| G1098-1 64   |                     | 138            | 20             | 20             | 1.096E+07      | 1.589E+06      | 6.900 | 53.9       | 458.8 ± 110.2    |
| G1098-1 69   |                     | 124            | 96             | 15             | 1.314E+07      | 1.017E+07      | 1.292 | 344.9      | 88.4 ± 12.2      |
| G1098-1 73   |                     | 239            | 98             | 50             | 7.596E+06      | 3.115E+06      | 2.439 | 105.6      | 165.9 ± 20.2     |
| G1098-1 74   |                     | 196            | 41             | 20             | 1.557E+07      | 3.258E+06      | 4.780 | 110.5      | 321.3 ± 55.6     |
| G1098-1 75   |                     | 254            | 52             | 25             | 1.614E+07      | 3.305E+06      | 4.885 | 112.1      | 328.1 ± 50.5     |
| G1098-1 76   |                     | 66             | 21             | 15             | 6.992E+06      | 2.225E+06      | 3.143 | 75.5       | 213.0 ± 53.6     |
|              |                     | 3347           | 1442           |                | 9.397E+06      | 4.048E+06      |       | 137.3      |                  |

Area of basic unit = 6.293E-07 cm<sup>-2</sup>

$\chi^2 = 365.717$  with 19 degrees of freedom

P( $\chi^2$ ) = 0.0%

Age Dispersion = 59.217%

Ns / Ni = 2.321 ± 0.073

Mean Ratio = 3.009 ± 0.441

Ages calculated using a zeta of 87.7 ± 0.8 for U3 glass

ρ<sub>D</sub> = 1.571E+06cm<sup>-2</sup> ND=2478

ρ<sub>D</sub> interpolated between top of can; ρ<sub>D</sub> = 1.644E+06cm<sup>-2</sup> ND = 1293  
bottom of can; ρ<sub>D</sub> = 1.506E+06cm<sup>-2</sup> ND = 1185

POOLED AGE = 158.0 ± 6.1 Ma

**CENTRAL AGE = 152.4 ± 21.1 Ma**

A:

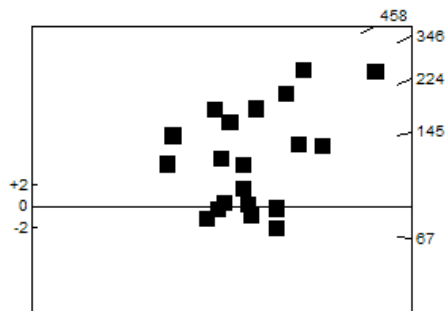



GC743-24 Zircon  
Counted by: PFG

Gnarly Knots-1 4350-4450m

| Slide<br>ref | Current<br>grain no | N <sub>s</sub> | N <sub>i</sub> | N <sub>a</sub> | ρ <sub>s</sub> | ρ <sub>i</sub> | RATIO | U<br>(ppm) | F.T. AGE<br>(Ma) |
|--------------|---------------------|----------------|----------------|----------------|----------------|----------------|-------|------------|------------------|
| G1098-1 2    |                     | 176            | 100            | 50             | 5.594E+06      | 3.178E+06      | 1.760 | 108.3      | 119.6 ± 15.2     |
| G1098-1 8    |                     | 125            | 104            | 30             | 6.621E+06      | 5.509E+06      | 1.202 | 187.7      | 81.9 ± 11.0      |
| G1098-1 11   |                     | 207            | 40             | 25             | 1.316E+07      | 2.543E+06      | 5.175 | 86.6       | 345.5 ± 60.2     |
| G1098-1 13   |                     | 273            | 34             | 20             | 2.169E+07      | 2.701E+06      | 8.029 | 92.0       | 528.5 ± 96.8     |
| G1098-1 17   |                     | 69             | 15             | 20             | 5.482E+06      | 1.192E+06      | 4.600 | 40.6       | 308.0 ± 88.0     |
| G1098-1 18   |                     | 215            | 83             | 40             | 8.541E+06      | 3.297E+06      | 2.590 | 112.4      | 175.3 ± 23.0     |
| G1098-1 19   |                     | 237            | 27             | 36             | 1.046E+07      | 1.192E+06      | 8.778 | 40.6       | 575.6 ± 117.6    |
| G1098-1 24   |                     | 161            | 33             | 25             | 1.023E+07      | 2.098E+06      | 4.879 | 71.5       | 326.2 ± 62.8     |
| G1098-1 26   |                     | 130            | 28             | 20             | 1.033E+07      | 2.225E+06      | 4.643 | 75.8       | 310.8 ± 65.1     |
| G1098-1 32   |                     | 223            | 96             | 40             | 8.859E+06      | 3.814E+06      | 2.323 | 129.9      | 157.4 ± 19.5     |
| G1098-1 36   |                     | 209            | 74             | 30             | 1.107E+07      | 3.920E+06      | 2.824 | 133.6      | 190.9 ± 26.2     |
| G1098-1 38   |                     | 98             | 54             | 25             | 6.229E+06      | 3.432E+06      | 1.815 | 117.0      | 123.3 ± 21.1     |
| G1098-1 43   |                     | 109            | 114            | 50             | 3.464E+06      | 3.623E+06      | 0.956 | 123.5      | 65.3 ± 8.9       |
| G1098-1 44   |                     | 83             | 74             | 50             | 2.638E+06      | 2.352E+06      | 1.122 | 80.1       | 76.5 ± 12.3      |
| G1098-1 45   |                     | 180            | 35             | 25             | 1.144E+07      | 2.225E+06      | 5.143 | 75.8       | 343.4 ± 63.9     |
| G1098-1 50   |                     | 211            | 51             | 20             | 1.676E+07      | 4.052E+06      | 4.137 | 138.1      | 277.7 ± 43.8     |
| G1098-1 51   |                     | 179            | 128            | 40             | 7.111E+06      | 5.085E+06      | 1.398 | 173.3      | 95.2 ± 11.2      |
| G1098-1 53   |                     | 180            | 101            | 40             | 7.151E+06      | 4.012E+06      | 1.782 | 136.7      | 121.1 ± 15.3     |
| G1098-1 56   |                     | 114            | 79             | 36             | 5.032E+06      | 3.487E+06      | 1.443 | 118.8      | 98.2 ± 14.5      |
| G1098-1 70   |                     | 137            | 99             | 50             | 4.354E+06      | 3.146E+06      | 1.384 | 107.2      | 94.2 ± 12.6      |
|              |                     | 3316           | 1369           |                | 7.841E+06      | 3.237E+06      |       | 110.3      |                  |

Area of basic unit = 6.293E-07 cm<sup>-2</sup>

$\chi^2 = 350.776$  with 19 degrees of freedom

P( $\chi^2$ ) = 0.0%

Age Dispersion = 59.229%

Ns / Ni = 2.422 ± 0.078

Mean Ratio = 3.299 ± 0.513

Ages calculated using a zeta of 87.7 ± 0.8 for U3 glass

ρ<sub>D</sub> = 1.564E+06cm<sup>-2</sup> ND = 2478

ρ<sub>D</sub> interpolated between top of can; ρ<sub>D</sub> = 1.644E+06cm<sup>-2</sup> ND = 1293  
bottom of can; ρ<sub>D</sub> = 1.506E+06cm<sup>-2</sup> ND = 1185

POOLED AGE = 164.0 ± 6.4 Ma

**CENTRAL AGE = 163.3 ± 22.6 Ma**

A:

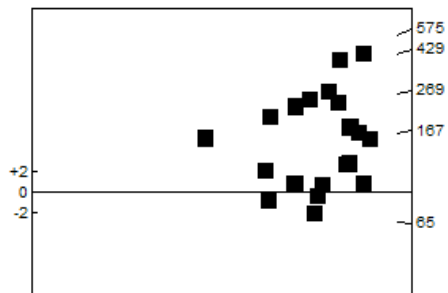



GC743-25 Zircon  
Counted by: PFG

Gnarly Knots-1 4500-4600m

| Slide<br>ref | Current<br>grain no | N <sub>s</sub> | N <sub>i</sub> | N <sub>a</sub> | ρ <sub>s</sub> | ρ <sub>i</sub> | RATIO | U<br>(ppm) | F.T. AGE<br>(Ma) |
|--------------|---------------------|----------------|----------------|----------------|----------------|----------------|-------|------------|------------------|
| G1098-1 3    |                     | 215            | 187            | 40             | 8.541E+06      | 7.429E+06      | 1.150 | 254.3      | 78.0 ± 8.0       |
| G1098-1 4    |                     | 93             | 50             | 20             | 7.389E+06      | 3.973E+06      | 1.860 | 136.0      | 125.8 ± 22.2     |
| G1098-1 7    |                     | 256            | 93             | 30             | 1.356E+07      | 4.926E+06      | 2.753 | 168.6      | 185.3 ± 22.8     |
| G1098-1 11   |                     | 173            | 108            | 25             | 1.100E+07      | 6.865E+06      | 1.602 | 235.0      | 108.4 ± 13.5     |
| G1098-1 12   |                     | 96             | 58             | 20             | 7.628E+06      | 4.608E+06      | 1.655 | 157.8      | 112.0 ± 18.8     |
| G1098-1 15   |                     | 72             | 72             | 60             | 1.907E+06      | 1.907E+06      | 1.000 | 65.3       | 67.9 ± 11.4      |
| G1098-1 25   |                     | 137            | 39             | 16             | 1.361E+07      | 3.873E+06      | 3.513 | 132.6      | 235.5 ± 43.1     |
| G1098-1 32   |                     | 196            | 39             | 25             | 1.246E+07      | 2.479E+06      | 5.026 | 84.9       | 334.3 ± 59.1     |
| G1098-1 41   |                     | 132            | 18             | 20             | 1.049E+07      | 1.430E+06      | 7.333 | 49.0       | 482.2 ± 121.6    |
| G1098-1 44   |                     | 87             | 55             | 25             | 5.530E+06      | 3.496E+06      | 1.582 | 119.7      | 107.1 ± 18.6     |
| G1098-1 45   |                     | 118            | 89             | 36             | 5.209E+06      | 3.929E+06      | 1.326 | 134.5      | 89.9 ± 12.8      |
| G1098-1 46   |                     | 165            | 38             | 30             | 8.740E+06      | 2.013E+06      | 4.342 | 68.9       | 289.8 ± 52.5     |
| G1098-1 49   |                     | 251            | 150            | 50             | 7.977E+06      | 4.767E+06      | 1.673 | 163.2      | 113.2 ± 12.0     |
| G1098-1 54   |                     | 199            | 48             | 20             | 1.581E+07      | 3.814E+06      | 4.146 | 130.6      | 277.0 ± 45.0     |
| G1098-1 55   |                     | 321            | 102            | 30             | 1.700E+07      | 5.403E+06      | 3.147 | 185.0      | 211.4 ± 24.5     |
| G1098-1 56   |                     | 285            | 184            | 50             | 9.058E+06      | 5.848E+06      | 1.549 | 200.2      | 104.9 ± 10.2     |
| G1098-1 58   |                     | 38             | 31             | 20             | 3.019E+06      | 2.463E+06      | 1.226 | 84.3       | 83.2 ± 20.2      |
| G1098-1 59   |                     | 169            | 61             | 16             | 1.678E+07      | 6.058E+06      | 2.770 | 207.4      | 186.4 ± 28.1     |
| G1098-1 63   |                     | 154            | 52             | 25             | 9.789E+06      | 3.305E+06      | 2.962 | 113.1      | 199.1 ± 32.2     |
| G1098-1 66   |                     | 140            | 94             | 30             | 7.416E+06      | 4.979E+06      | 1.489 | 170.4      | 100.9 ± 13.6     |
|              |                     | 3297           | 1568           |                | 8.910E+06      | 4.238E+06      |       | 145.1      |                  |

Area of basic unit = 6.293E-07 cm<sup>-2</sup>

$\chi^2 = 230.770$  with 19 degrees of freedom

P( $\chi^2$ ) = 0.0%

Age Dispersion = 46.879%

Ns / Ni = 2.103 ± 0.065

Mean Ratio = 2.605 ± 0.362

Ages calculated using a zeta of 87.7 ± 0.8 for U3 glass

ρ<sub>D</sub> = 1.557E+06cm<sup>-2</sup> ND=2478

ρ<sub>D</sub> interpolated between top of can; ρ<sub>D</sub> = 1.644E+06cm<sup>-2</sup> ND = 1293  
bottom of can; ρ<sub>D</sub> = 1.506E+06cm<sup>-2</sup> ND = 1185

POOLED AGE = 142.0 ± 5.4 Ma

**CENTRAL AGE = 143.2 ± 16.1 Ma**

A:

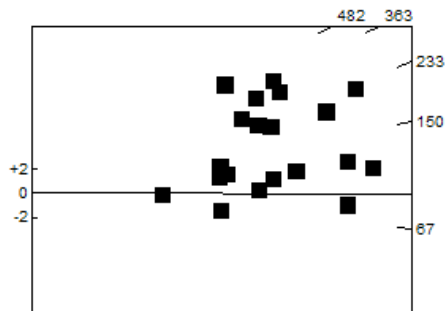



GC743-26 Zircon  
Counted by: PFG

Gnarly Knots-1 4625-4725m

| Slide ref  | Current grain no | N <sub>s</sub> | N <sub>i</sub> | N <sub>a</sub> | ρ <sub>s</sub> | ρ <sub>i</sub> | RATIO | U (ppm) | F.T. AGE (Ma) |
|------------|------------------|----------------|----------------|----------------|----------------|----------------|-------|---------|---------------|
| G1098-1 1  |                  | 268            | 171            | 40             | 1.065E+07      | 6.793E+06      | 1.567 | 233.6   | 105.6 ± 10.6  |
| G1098-1 3  |                  | 149            | 48             | 25             | 9.471E+06      | 3.051E+06      | 3.104 | 104.9   | 207.6 ± 34.8  |
| G1098-1 7  |                  | 55             | 47             | 25             | 3.496E+06      | 2.987E+06      | 1.170 | 102.7   | 79.0 ± 15.8   |
| G1098-1 8  |                  | 276            | 124            | 50             | 8.772E+06      | 3.941E+06      | 2.226 | 135.5   | 149.5 ± 16.5  |
| G1098-1 9  |                  | 190            | 116            | 40             | 7.548E+06      | 4.608E+06      | 1.638 | 158.5   | 110.4 ± 13.2  |
| G1098-1 11 |                  | 129            | 90             | 20             | 1.025E+07      | 7.151E+06      | 1.433 | 245.9   | 96.7 ± 13.4   |
| G1098-1 20 |                  | 315            | 52             | 40             | 1.251E+07      | 2.066E+06      | 6.058 | 71.0    | 399.1 ± 60.4  |
| G1098-1 28 |                  | 126            | 58             | 25             | 8.009E+06      | 3.687E+06      | 2.172 | 126.8   | 146.0 ± 23.4  |
| G1098-1 29 |                  | 251            | 74             | 40             | 9.971E+06      | 2.940E+06      | 3.392 | 101.1   | 226.5 ± 30.4  |
| G1098-1 33 |                  | 265            | 76             | 25             | 1.684E+07      | 4.831E+06      | 3.487 | 166.1   | 232.7 ± 30.7  |
| G1098-1 35 |                  | 82             | 82             | 40             | 3.258E+06      | 3.258E+06      | 1.000 | 112.0   | 67.6 ± 10.7   |
| G1098-1 36 |                  | 134            | 73             | 36             | 5.915E+06      | 3.222E+06      | 1.836 | 110.8   | 123.6 ± 18.2  |
| G1098-1 37 |                  | 142            | 63             | 28             | 8.059E+06      | 3.575E+06      | 2.254 | 123.0   | 151.4 ± 23.2  |
| G1098-1 46 |                  | 174            | 120            | 40             | 6.912E+06      | 4.767E+06      | 1.450 | 164.0   | 97.8 ± 11.8   |
| G1098-1 51 |                  | 101            | 26             | 12             | 1.337E+07      | 3.443E+06      | 3.885 | 118.4   | 258.7 ± 57.2  |
| G1098-1 65 |                  | 135            | 65             | 50             | 4.290E+06      | 2.066E+06      | 2.077 | 71.0    | 139.6 ± 21.3  |
| G1098-1 72 |                  | 336            | 150            | 40             | 1.335E+07      | 5.959E+06      | 2.240 | 204.9   | 150.5 ± 15.1  |
| G1098-1 73 |                  | 202            | 73             | 50             | 6.420E+06      | 2.320E+06      | 2.767 | 79.8    | 185.4 ± 25.6  |
| G1098-1 80 |                  | 337            | 83             | 50             | 1.071E+07      | 2.638E+06      | 4.060 | 90.7    | 270.2 ± 33.6  |
| G1098-1 82 |                  | 193            | 47             | 40             | 7.667E+06      | 1.867E+06      | 4.106 | 64.2    | 273.2 ± 44.8  |
|            |                  | 3860           | 1638           |                | 8.567E+06      | 3.635E+06      |       | 125.0   |               |

Area of basic unit = 6.293E-07 cm<sup>-2</sup>

$\chi^2 = 208.487$  with 19 degrees of freedom

P( $\chi^2$ ) = 0.0%

Age Dispersion = 41.434%

Ns / Ni = 2.357 ± 0.069

Mean Ratio = 2.596 ± 0.283

Ages calculated using a zeta of 87.7 ± 0.8 for U3 glass

ρ<sub>D</sub> = 1.550E+06cm<sup>-2</sup> ND=2478

ρ<sub>D</sub> interpolated between top of can; ρ<sub>D</sub> = 1.644E+06cm<sup>-2</sup> ND = 1293  
bottom of can; ρ<sub>D</sub> = 1.506E+06cm<sup>-2</sup> ND = 1185

POOLED AGE = 158.2 ± 5.8 Ma

**CENTRAL AGE = 151.6 ± 15.2 Ma**

A:

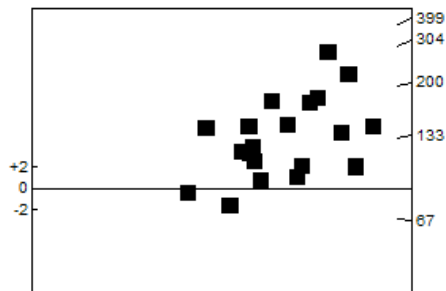

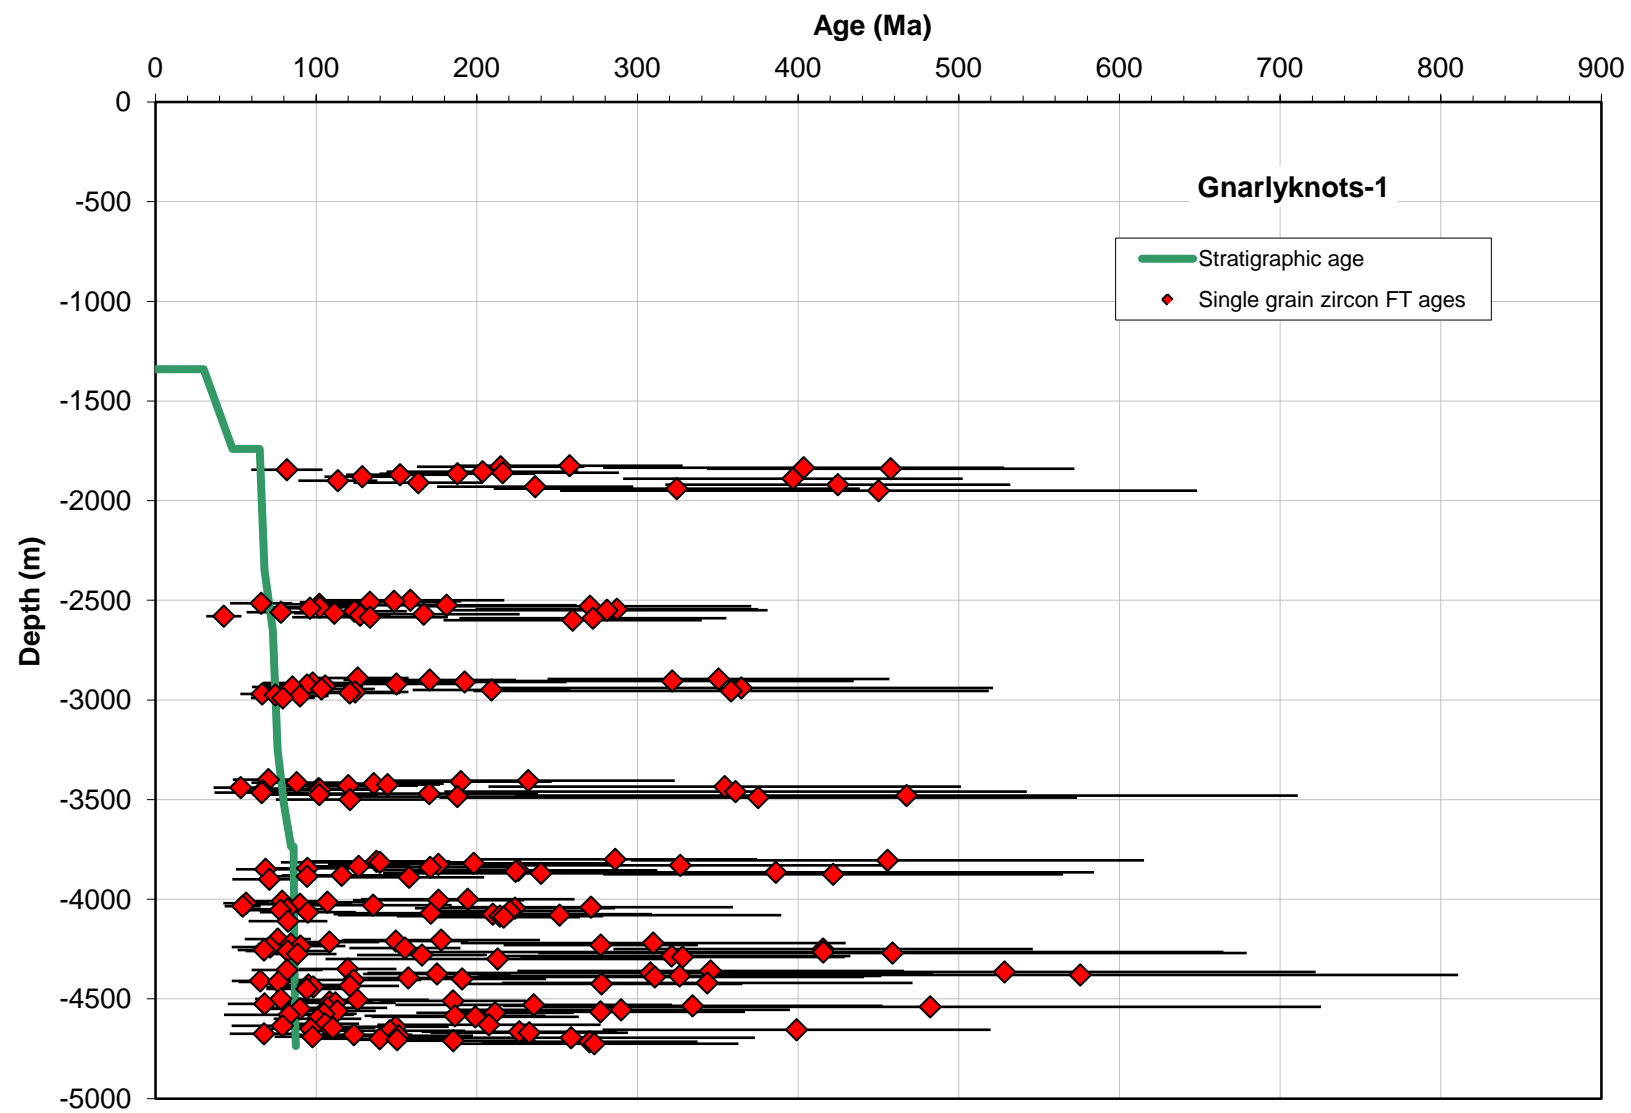

## Supplementary Data

### Well and Sample Information

| <b>Well</b>    | <b>Sample #</b> | <b>Depth (m)</b> | <b>Strat. Age</b> | <b>Formation Name</b> |
|----------------|-----------------|------------------|-------------------|-----------------------|
| Gnarlyknots-1A | 74317           | 1825-1950        | Maastrichtian     | Potoroo Fm.           |
| Gnarlyknots-1A | 74318           | 2500-2600        | Campanian-        | Potoroo Fm.           |
| Gnarlyknots-1A | 74319           | 2890-2990        | Maastrichtian     | Potoroo Fm.           |
| Gnarlyknots-1A | 74320           | 3400-3500        | Campanian         | Potoroo Fm.           |
| Gnarlyknots-1A | 74321           | 3800-3900        | Santonian         | Potoroo Fm.           |
| Gnarlyknots-1A | 74322           | 4000-4110        | Santonian         | Potoroo-Wigunda Fms.  |
| Gnarlyknots-1A | 74323           | 4200-4300        | Santonian         | Potoroo-Wigunda Fms.  |
| Gnarlyknots-1A | 74324           | 4350-4450        | Santonian         | Potoroo-Wigunda Fms.  |
| Gnarlyknots-1A | 74325           | 4500-4600        | Coniacian         | Potoroo-Wigunda Fms.  |
| Gnarlyknots-1A | 74326           | 4625-4725        | Coniacian-        | Potoroo-Wigunda Fms.  |
| Gnarlyknots-1A |                 |                  | Turonian          | Potoroo-Wigunda Fms.  |

Coordinates - Gnarlyknots-1A

| <b>LAT</b>       | <b>LONG</b>       |             |
|------------------|-------------------|-------------|
| 34° 17' 39.06" S | 131° 23' 03.01" E | WGS 84      |
| <b>EASTING</b>   | <b>NORTHING</b>   |             |
| 719 434.2 m      | 6 202 651.4 m     | UTM Zone 52 |
